# Supplementary material for: Minimalist revision and description of 403 new species in 11 subfamilies of Costa Rican braconid parasitoid wasps, including host records for 219 species
Source: PubMed Central journal article supplement (PMC8390796; doi:10.3897/zookeys.1013.55600), 2021-02-02

## 2. Braconinae BOLD TaxonID Tree

Title : Tree Result - Search: Sample IDs (203 records returned) (203 records selected)

Date : 17-Nov-2020

Data Type : Nucleotide

Distance Model : Kimura 2 Parameter

Marker : COI-5P

Colourization : [blue]=Stop Codons [red]=Contamination or misidentification

Label : Sample ID

Label : Taxon

Label : Extra Info

Label : Sequence Length

Label : Barcode Cluster (BIN)

Filter : exclude records with stop codons

Sequence Count : 201

Species count : 77

Genus count : 7

Family count : 1

Unidentified : 6

BIN Count : 77

10 %

Compsobracon Malaise205[1]BIOUG28719-D05|Malaise trap PL12-6A|591[0n]|BOLD:ADB0205  
 Bracon juliodiazi[2]BIOUG05280-F06|BSE Malaise Trap|658[0n]|BOLD:ACG3370  
 Bracon juliodiazi[3]BIOUG05346-A12|BSE Malaise Trap|582[0n]|BOLD:ACG3370  
 Bracon juliodiazi[4]BIOUG05279-B05|BSE Malaise Trap|658[0n]|BOLD:ACG3370  
 Bracon juliodiazi[5]BIOUG05334-A05|BSE Malaise Trap|658[0n]|BOLD:ACG3370  
 Bracon juliodiazi[6]BIOUG05279-C06|BSE Malaise Trap|658[0n]|BOLD:ACG3370  
 Bracon juliodiazi[7]BIOUG54480-C12|Malaise trap PL12-3D|655[0n]|BOLD:ACG3370  
 Bracon juliodiazi[8]BIOUG53191-E01|Malaise trap PL12-3C|652[0n]|BOLD:ACG3370  
 Bracon juliodiazi[9]BIOUG56452-B05|Malaise trap PL12-7D|653[0n]|BOLD:ACG3370  
 Bracon juliodiazi[10]BIOUG54923-B11|Malaise trap PL12-5C|655[0n]|BOLD:ACG3370  
 Bracon juliodiazi[11]BIOUG50568-E08|Malaise trap PL12-6B|655[0n]|BOLD:ACG3370  
 Bracon juliodiazi[12]BIOUG54316-G12|Malaise trap PL12-5C|655[0n]|BOLD:ACG3370  
 Bracon juliodiazi[13]BIOUG56494-E08|Malaise trap PL12-9D|651[0n]|BOLD:ACG3370  
 Bracon juliodiazi[14]BIOUG52985-C06|Malaise trap PL12-3C|652[0n]|BOLD:ACG3370  
 Bracon juliodiazi[15]BIOUG50485-F09|Malaise trap PL12-5A|655[0n]|BOLD:ACG3370  
 Bracon juliodiazi[16]BIOUG55951-D10|Malaise trap PL12-4D|651[0n]|BOLD:ACG3370  
 Bracon juliodiazi[17]BIOUG55981-G09|Malaise trap PL12-7D|654[0n]|BOLD:ACG3370  
 Bracon juliodiazi[18]BIOUG57109-C12|Malaise trap PL12-5D|654[0n]|BOLD:ACG3370  
 Bracon juliodiazi[19]BIOUG54484-A02|Malaise trap PL12-3D|652[0n]|BOLD:ACG3370  
 Bracon juliodiazi[20]BIOUG56053-A07|Malaise trap PL12-3D|654[0n]|BOLD:ACG3370  
 Bracon juliodiazi[21]BIOUG54480-G10|Malaise trap PL12-3D|655[0n]|BOLD:ACG3370  
 Bracon juliodiazi[22]BIOUG09430-D04|BSE Malaise Trap|567[0n]|BOLD:ACG3370  
 Bracon juliodiazi[23]BIOUG08768-F10|BSE Malaise Trap|598[0n]|BOLD:ACG3370  
 Bracon juliodiazi[24]BIOUG17534-A07|BSE Malaise Trap|594[0n]|BOLD:ACG3370  
 Bracon juliodiazi[25]BIOUG05346-C08|BSE Malaise Trap|603[0n]|BOLD:ACG3370  
 Bracon juliodiazi[26]BIOUG09074-B02|BSE Malaise Trap|598[0n]|BOLD:ACG3370  
 Bracon juliodiazi[27]BIOUG09074-B05|BSE Malaise Trap|599[0n]|BOLD:ACG3370  
 Bracon juliodiazi[28]BIOUG17534-A11|BSE Malaise Trap|603[0n]|BOLD:ACG3370  
 Bracon juliodiazi[29]BIOUG18551-C02|BSE Malaise Trap|588[0n]|BOLD:ACG3370  
 Bracon juliodiazi[30]BIOUG17969-A05|BSE Malaise Trap|588[0n]|BOLD:ACG3370  
 Bracon juliodiazi[31]BIOUG09074-C11|BSE Malaise Trap|595[0n]|BOLD:ACG3370  
 Bracon juliodiazi[32]BIOUG17494-E08|BSE Malaise Trap|603[0n]|BOLD:ACG3370  
 Bracon juliodiazi[33]BIOUG05334-H11|BSE Malaise Trap|604[0n]|BOLD:ACG3370  
 Bracon juliodiazi[34]BIOUG05414-B11|BSE Malaise Trap|628[0n]|BOLD:ACG3370  
 Bracon juliodiazi[35]BIOUG05414-G02|BSE Malaise Trap|625[0n]|BOLD:ACG3370  
 Bracon juliodiazi[36]BIOUG17530-E09|BSE Malaise Trap|588[0n]|BOLD:ACG3370  
 Bracon juliodiazi[37]BIOUG54347-E07|Malaise trap PL12-5C|653[0n]|BOLD:ACG3370  
 Bracon juliodiazi[38]BIOUG54337-F05|Malaise trap PL12-5C|651[0n]|BOLD:ACG3370  
 Bracon juliodiazi[39]BIOUG54701-A03|Malaise trap PL12-3D|654[0n]|BOLD:ACG3370  
 Bracon juliodiazi[40]BIOUG53325-B01|Malaise trap PL12-3C|695[0n]|BOLD:ACG3370  
 Bracon juliodiazi[41]BIOUG08768-D10|BSE Malaise Trap|589[0n]|BOLD:ACG3370  
 Bracon juliodiazi[42]BIOUG54484-C04|Malaise trap PL12-3D|655[0n]|BOLD:ACG3370  
 Bracon juliodiazi[43]BIOUG55951-E02|Malaise trap PL12-4D|654[0n]|BOLD:ACG3370  
 Bracon Malaise3370[44]DHJPAP0064557|Portentomorpha xanthialis|658[0n]|BOLD:AEB6240  
 Bracon josejaramilloi[45]DHJPAP0049094|Lerema liris|658[0n]|BOLD:ACK7911  
 Bracon josejaramilloi[46]DHJPAP0028977|Lerema liris|657[0n]|BOLD:ACK7911  
 Bracon josejaramilloi[47]DHJPAP0058913|Morys valerius valda|658[0n]|BOLD:ACK7911  
 Digonogastra Janzen03[48]DHJPAP0062749|Argon lota|658[0n]|BOLD:ADP8311  
 Digonogastra Janzen02[49]DHJPAP0058979|Argon lota|661[0n]|BOLD:ADB2063  
 Bracon Malaise104[50]BIOUG44686-A07|Malaise trap PL12-3B|653[0n]|BOLD:ADY0104  
 Bracon gerardovegai[51]BIOUG22966-G03|ESG Malaise Trap|528[0n]|BOLD:ACW3155  
 Bracon gerardovegai[52]BIOUG27938-F06|ESG Malaise Trap|576[0n]|BOLD:ACW3155  
 Bracon jimlewisii[53]BIOUG36967-F06|Derrumbe Malaise Trap|577[0n]|BOLD:ADL5861  
 Atanycolus Malaise3400[54]BIOUG29324-G12|Malaise trap PL12-6A|588[0n]|BOLD:ADB3400  
 Atanycolus Malaise3400[55]BIOUG29207-H04|Malaise trap PL12-6A|588[0n]|BOLD:ADB3400  
 Atanycolus Malaise3400[56]BIOUG29208-E03|Malaise trap PL12-6A|585[0n]|BOLD:ADB3400  
 Digonogastra nickgrishini[57]DHJPAP0061042|light trap|658[0n]|BOLD:ADJ3490  
 Digonogastra Malaise1192[58]BIOUG48403-F09|Malaise trap PL12-5A|651[0n]|BOLD:AEA1192  
 Digonogastra Malaise3488[59]BIOUG29207-G01|Malaise trap PL12-6A|591[0n]|BOLD:ADB3488  
 Digonogastra montyloydii[60]DHJPAP0028323|Oiketeticus kirbyi|387[0n]|BOLD:ADD0356  
 Digonogastra montyloydii[61]DHJPAP0028321|Oiketeticus kirbyi|576[0n]|BOLD:ADD0356  
 Digonogastra montyloydii[62]DHJPAP0028324|Oiketeticus kirbyi|654[0n]|BOLD:ADD0356  
 Digonogastra montyloydii[63]DHJPAP0028320|Oiketeticus kirbyi|654[0n]|BOLD:ADD0356  
 Digonogastra motohasegawai[64]DHJPAP0061039|light trap|658[0n]|BOLD:ADJ4657  
 Digonogastra motohasegawai[65]DHJPAP0061037|light trap|658[0n]|BOLD:ADJ4657  
 Digonogastra natwheelwrightii[66]DHJPAP0062413|light trap|658[0n]|BOLD:ADM7321  
 Digonogastra montywoodii[67]DHJPAP0061034|light trap|658[0n]|BOLD:ADJ0327  
 Digonogastra Malaise0873[68]BIOUG50477-G08|Malaise trap PL12-6B|654[0n]|BOLD:AEB0873



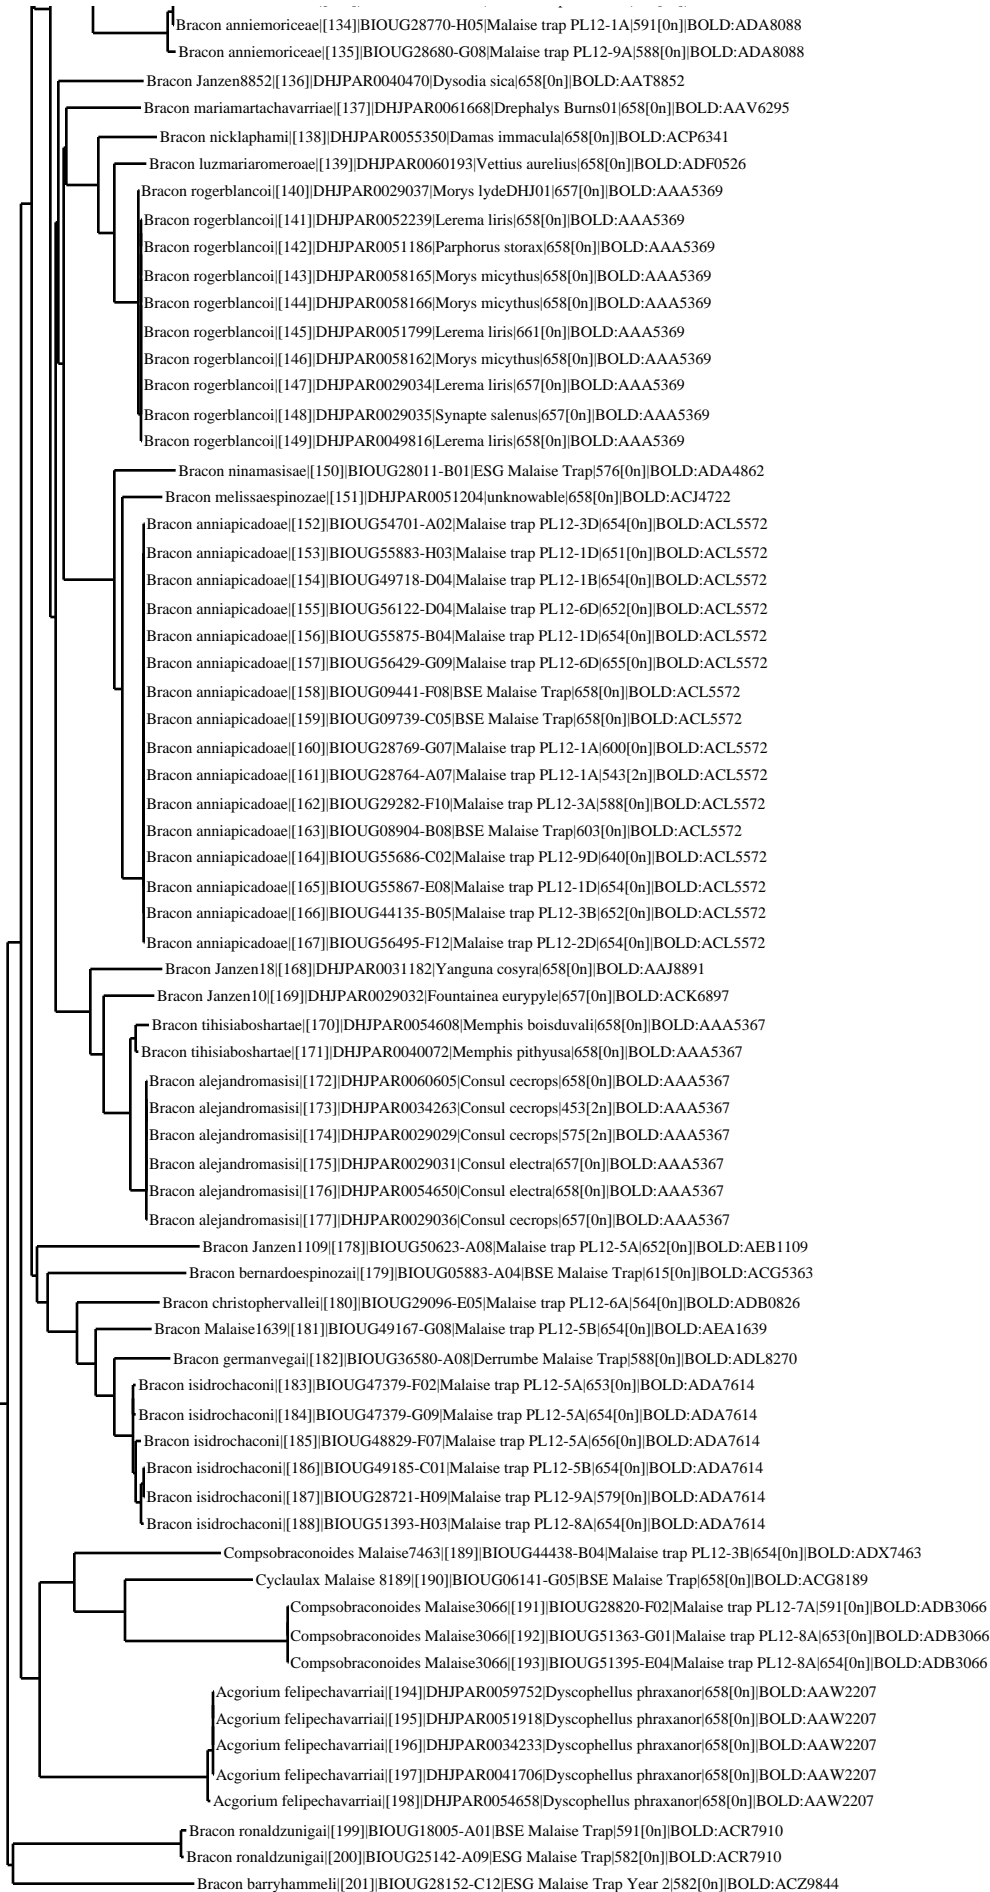

Supplement: zookeys-1013-001-s002.pdf [file zookeys-1013-001-s002.pdf]
