# Supplementary material for: Minimalist revision and description of 403 new species in 11 subfamilies of Costa Rican braconid parasitoid wasps, including host records for 219 species
Source: PubMed Central journal article supplement (PMC8390796; doi:10.3897/zookeys.1013.55600), 2021-02-02
Supplement: zookeys-1013-001-s001.pdf [file zookeys-1013-001-s001.pdf]

# 1. Agathidinae BOLD TaxonID Tree

Title : Tree Result - Search: Sample IDs (2130 records returned) (2130 records selected)

Date : 23-Nov-2020

Data Type : Nucleotide

Distance Model : Kimura 2 Parameter

Marker : COI-5P

Colourization : [blue]=Stop Codons [red]=Contamination or misidentification

Label : Sample ID

Label : Taxon

Label : Extra Info

Label : Sequence Length

Label : Barcode Cluster (BIN)

Filter : exclude records with stop codons

Sequence Count : 1693

Species count : 142

Genus count : 14

Family count : 1

Unidentified : 0

BIN Count : 139



Hemichoma frankhovorei[98]DHJP0029303Halysidota pectnella[654]0nBOLD:ACM2584  
 Hemichoma frankhovorei[99]DHJP0037925Halysidota orientalis[658]0nBOLD:ACM2584  
 Hemichoma frankhovorei[100]DHJP0037926Halysidota orientalis[658]0nBOLD:ACM2584  
 Hemichoma frankhovorei[101]DHJP0054503Halysidota schausi[658]0nBOLD:ACM2584  
 Hemichoma frankhovorei[102]DHJP0036708Halysidota pectnella[642]0nBOLD:ACM2584  
 Hemichoma frankhovorei[103]DHJP0036689Halysidota pectnella[627]0nBOLD:ACM2584  
 Hemichoma frankhovorei[104]DHJP0036713Halysidota pectnella[627]0nBOLD:ACM2584  
 Hemichoma frankhovorei[105]DHJP0041155Halysidota underwoodi[291]0n  
 Hemichoma frankhovorei[106]DHJP0041160Halysidota underwoodi[291]0n  
 Hemichoma frankhovorei[107]DHJP0041161Halysidota underwoodi[291]0n  
 Hemichoma frankhovorei[108]DHJP0041158Halysidota underwoodi[291]0n  
 Hemichoma frankhovorei[109]DHJP0041154Halysidota underwoodi[288]0n  
 Hemichoma frankhovorei[110]DHJP0028250Halysidota pectnella[321]0nBOLD:ACM2584  
 Hemichoma frankhovorei[111]DHJP0028249Halysidota pectnella[255]0n  
 Hemichoma frankhovorei[112]DHJP0028252Halysidota pectnella[258]0n  
 Hemichoma frankhovorei[113]DHJP0028263Halysidota pectnella[258]0n  
 Hemichoma frankhovorei[114]DHJP0028247Halysidota pectnella[261]0n  
 Hemichoma frankhovorei[115]DHJP0028248Halysidota pectnella[261]0n  
 Hemichoma frankhovorei[116]DHJP0028242Halysidota pectnella[261]0n  
 Hemichoma frankhovorei[117]DHJP0028258Halysidota pectnella[261]0n  
 Hemichoma frankhovorei[118]DHJP0028260Halysidota pectnella[261]0n  
 Hemichoma frankhovorei[119]DHJP0028246Halysidota pectnella[261]0n  
 Hemichoma frankhovorei[120]DHJP0028254Halysidota pectnella[261]0n  
 Hemichoma frankhovorei[121]DHJP0028243Halysidota pectnella[261]0n  
 Hemichoma frankhovorei[122]DHJP0028262Halysidota pectnella[261]0n  
 Hemichoma frankhovorei[123]DHJP0028259Halysidota pectnella[261]0n  
 Hemichoma frankhovorei[124]DHJP0028244Halysidota pectnella[261]0n  
 Hemichoma frankhovorei[125]DHJP0006774Halysidota orientalis[234]0n  
 Hemichoma frankhovorei[126]DHJP0028264Halysidota pectnella[267]0n  
 Hemichoma frankhovorei[127]DHJP0054502Halysidota schausi[658]0nBOLD:ACM2584  
 Hemichoma frankhovorei[128]DHJP0054501Halysidota schausi[658]0nBOLD:ACM2584  
 Hemichoma johnkingsolveri[129]DHJP0060429Pachydota saduca[558]0nBOLD:ABU8130  
 Hemichoma johnkingsolveri[130]DHJP0038613Carathis septentrionalis[606]0nBOLD:ABU8130  
 Hemichoma johnkingsolveri[131]DHJP0041168Pachydota saduca[622]0nBOLD:ABU8130  
 Hemichoma johnkingsolveri[132]DHJP0015560Pachydota saduca[555]0nBOLD:ABU8130  
 Hemichoma johnkingsolveri[133]DHJP0022195Pachydota saduca[591]0nBOLD:ABU8130  
 Hemichoma johnkingsolveri[134]DHJP0062414Pachydota saduca[658]0nBOLD:ABU8130  
 Hemichoma johnkingsolveri[135]DHJP0046730Pachydota saduca[658]0nBOLD:ABU8130  
 Hemichoma johnkingsolveri[136]DHJP0036333Pachydota saduca[654]0nBOLD:ABU8130  
 Hemichoma johnkingsolveri[137]DHJP0058547Pachydota saduca[658]0nBOLD:ABU8130  
 Hemichoma johnkingsolveri[138]DHJP0042359Pachydota saduca[658]0nBOLD:ABU8130  
 Hemichoma johnkingsolveri[139]DHJP0061015Pachydota saduca[658]0nBOLD:ABU8130  
 Hemichoma johnkingsolveri[140]DHJP0061442Pachydota saduca[658]0nBOLD:ABU8130  
 Hemichoma johnkingsolveri[141]DHJP0062416Pachydota saduca[658]0nBOLD:ABU8130  
 Hemichoma johnkingsolveri[142]DHJP0042358Pachydota saduca[658]0nBOLD:ABU8130  
 Hemichoma johnkingsolveri[143]DHJP0057646Pachydota saduca[658]0nBOLD:ABU8130  
 Hemichoma johnkingsolveri[144]DHJP0057457Pachydota saduca[658]0nBOLD:ABU8130  
 Hemichoma johnkingsolveri[145]DHJP0060428Pachydota saduca[658]0nBOLD:ABU8130  
 Hemichoma johnkingsolveri[146]DHJP0063374Pachydota saduca[658]0nBOLD:ABU8130  
 Hemichoma johnkingsolveri[147]DHJP0046732Pachydota saduca[658]0nBOLD:ABU8130  
 Hemichoma johnkingsolveri[148]DHJP0062011Pachydota saduca[658]0nBOLD:ABU8130  
 Hemichoma johnkingsolveri[149]DHJP0015558Pachydota saduca[654]0nBOLD:ABU8130  
 Hemichoma johnkingsolveri[150]DHJP0062013Pachydota drucei[658]0nBOLD:ABU8130  
 Hemichoma johnkingsolveri[151]DHJP0058548Pachydota saduca[658]0nBOLD:ABU8130  
 Hemichoma johnkingsolveri[152]DHJP0061016Pachydota saduca[658]1nBOLD:ABU8130  
 Hemichoma johnkingsolveri[153]DHJP0060427Carathis septentrionalis[633]0nBOLD:ABU8130  
 Hemichoma johnkingsolveri[154]DHJP0015559Pachydota saduca[556]15n  
 Hemichoma johnkingsolveri[155]DHJP0057945Pachydota saduca[614]0nBOLD:ABU8130  
 Hemichoma johnkingsolveri[156]DHJP0062010Pachydota saduca[658]0nBOLD:ABU8130  
 Hemichoma johnkingsolveri[157]DHJP0046731Pachydota saduca[658]0nBOLD:ABU8130  
 Zelomorpha Janzen4431[158]DHJP0064388Oraesia serpens[653]0nBOLD:ADJ4431  
 Zelomorpha Janzen4431[159]DHJP0065127Gonodonta sinaldus[621]0nBOLD:ADJ4431  
 Zelomorpha Janzen4431[160]DHJP0061441Graphigona Poole01[658]0nBOLD:ADJ4431  
 Zelomorpha willsflowersi[161]DHJP0009412Coenipeta bibitrix[624]0nBOLD:ADD0170  
 Zelomorpha willsflowersi[162]DHJP0009413Coenipeta bibitrix[624]0nBOLD:ADD0170  
 Zelomorpha willsflowersi[163]DHJP0009414Coenipeta bibitrix[624]0nBOLD:ADD0170  
 Zelomorpha willsflowersi[164]DHJP0009415Coenipeta bibitrix[624]0nBOLD:ADD0170  
 Zelomorpha willsflowersi[165]DHJP0009418Coenipeta bibitrix[597]0nBOLD:ADD0170  
 Zelomorpha willsflowersi[166]DHJP0021205Goniobelia Poole02[654]0nBOLD:ADD0170  
 Zelomorpha willsflowersi[167]DHJP0010194Coenipeta bibitrix[658]0nBOLD:ADD0170  
 Zelomorpha willsflowersi[168]DHJP0057944Cyclopteryx niveinotata[387]2nBOLD:ADD0170  
 Zelomorpha willsflowersi[169]DHJP0021146Tyrissa acygonia[645]0nBOLD:ADD0170  
 Zelomorpha paulgoldsteini[170]DHJP0041159Nicetas Poole22[255]1n  
 Zelomorpha paulgoldsteini[171]DHJP0040222Callopietria mexicana[540]0nBOLD:AAZ6457  
 Zelomorpha paulgoldsteini[172]DHJP0009404Rejectaria splendida[624]0nBOLD:AAZ6457  
 Zelomorpha paulgoldsteini[173]DHJP0041152Rejectaria splendida[622]0nBOLD:AAZ6457  
 Zelomorpha paulgoldsteini[174]DHJP0041153Rejectaria splendida[623]0nBOLD:AAZ6457  
 Zelomorpha paulgoldsteini[175]BIOUG27746-F03ESG Malaise Trap[621]0nBOLD:AAZ6457  
 Zelomorpha paulgoldsteini[176]DHJP0054485Rejectaria splendida[620]0nBOLD:AAZ6457  
 Zelomorpha paulgoldsteini[177]BIOUG22611-D10ESG Malaise Trap[627]0nBOLD:AAZ6457  
 Zelomorpha paulgoldsteini[178]DHJP0036684Nicetas Janzen02[618]0nBOLD:AAZ6457  
 Zelomorpha paulgoldsteini[179]DHJP0016426Rejectaria Janzen02[658]1nBOLD:AAZ6457  
 Zelomorpha paulgoldsteini[180]DHJP0030382Rejectaria Janzen06[654]0nBOLD:AAZ6457  
 Zelomorpha paulgoldsteini[181]DHJP0064387Salia Poole03[658]0nBOLD:AAZ6457  
 Zelomorpha paulgoldsteini[182]DHJP0042810Nicetas Poole20[658]0nBOLD:AAZ6457  
 Zelomorpha paulgoldsteini[183]DHJP0057458Rejectaria Janzen02[658]0nBOLD:AAZ6457  
 Zelomorpha paulgoldsteini[184]DHJP0042808Nicetas Poole20[658]0nBOLD:AAZ6457  
 Zelomorpha paulgoldsteini[185]DHJP0042357Callopietria floridensis[658]0nBOLD:AAZ6457  
 Zelomorpha paulgoldsteini[186]DHJP0065134Callopietria floridensis[658]0nBOLD:AAZ6457  
 Zelomorpha paulgoldsteini[187]DHJP0052697Callopietria floridensis[658]0nBOLD:AAZ6457  
 Zelomorpha paulgoldsteini[188]DHJP0057443Nicetas antonalisDHJ02[658]0nBOLD:AAZ6457  
 Zelomorpha paulgoldsteini[189]DHJP0028032Rejectaria Janzen06[658]0nBOLD:AAZ6457  
 Zelomorpha paulgoldsteini[190]DHJP0044986Nicetas Poole21[661]0nBOLD:AAZ6457  
 Zelomorpha paulgoldsteini[191]DHJP0054469Rejectaria splendida[658]0nBOLD:AAZ6457  
 Zelomorpha paulgoldsteini[192]DHJP0054470Rejectaria splendida[658]0nBOLD:AAZ6457  
 Zelomorpha paulgoldsteini[193]DHJP0016425Rejectaria Janzen02[658]0nBOLD:AAZ6457  
 Zelomorpha paulgoldsteini[194]DHJP0057447Rejectaria Janzen06[658]0nBOLD:AAZ6457  
 Zelomorpha paulgoldsteini[195]DHJP0057649Rejectaria splendidaDHJ01[658]0nBOLD:AAZ6457  
 Zelomorpha paulgoldsteini[196]BIOUG27999-D09ESG Malaise Trap[600]0nBOLD:AAZ6457  
 Zelomorpha paulgoldsteini[197]DHJP0064391Dusponera fannia[653]0nBOLD:AAZ6457  
 Zelomorpha paulgoldsteini[198]DHJP0015539Rejectaria Poole11[645]0nBOLD:AAZ6457  
 Zelomorpha paulgoldsteini[199]BIOUG27762-C12ESG Malaise Trap Year 2[564]0nBOLD:AAZ6457  
 Zelomorpha paulgoldsteini[200]BIOUG27762-C12ESG Malaise Trap Year 1[564]0nBOLD:AAZ6457

Zelomorpha paulgoldsteini[198]DHJPAR0015539|Rejectaria Poole1|645[0n]|BOLD:AAZ6457  
Zelomorpha paulgoldsteini[199]BIOUG27762-C12|ESG Malaise Trap Year 2|564[0n]|BOLD:AAZ6457  
Zelomorpha paulgoldsteini[200]DHJPAR0057460|Nicetas Poole20|632[0n]|BOLD:AAZ6457  
Zelomorpha paulgoldsteini[201]BIOUG22611-D08|ESG Malaise Trap|628[0n]|BOLD:AAZ6457  
Zelomorpha paulgoldsteini[202]BIOUG23959-F01|ESG Malaise Trap|588[0n]|BOLD:AAZ6457  
Zelomorpha danjohnsoni[203]DHJPAR0009409|Diastema morata|624[0n]|BOLD:ADC9984  
Zelomorpha larrykirkendalli[204]DHJPAR0052087|Opisthoxia uncinata|574[0n]|BOLD:ACC2880  
Zelomorpha larrykirkendalli[205]DHJPAR0063795|Opisthoxia molpadia|609[0n]|BOLD:ACC2880  
Zelomorpha larrykirkendalli[206]DHJPAR0064520|Opisthoxia amabilis|658[0n]|BOLD:ACC2880  
Zelomorpha larrykirkendalli[207]DHJPAR0063996|Argyrotome alba|658[0n]|BOLD:ACC2880  
Zelomorpha larrykirkendalli[208]DHJPAR0055084|Opisthoxia molpadia|658[0n]|BOLD:ACC2880  
Zelomorpha larrykirkendalli[209]DHJPAR0064515|Argyrotome alba|658[0n]|BOLD:ACC2880  
Zelomorpha larrykirkendalli[210]DHJPAR0064509|Opisthoxia amabilis|658[0n]|BOLD:ACC2880  
Zelomorpha larrykirkendalli[211]DHJPAR0064514|Opisthoxia amabilis|658[0n]|BOLD:ACC2880  
Zelomorpha larrykirkendalli[212]DHJPAR0064519|Opisthoxia asopis|658[0n]|BOLD:ACC2880  
Zelomorpha larrykirkendalli[213]DHJPAR0015540|Opisthoxia bella|654[0n]|BOLD:ACC2880  
Zelomorpha larrykirkendalli[214]DHJPAR0055988|Opisthoxia molpadia|407[0n]|BOLD:ACC2880  
Zelomorpha larrykirkendalli[215]DHJPAR0055981|Opisthoxia uncinata|670[0n]|BOLD:ACC2880  
Zelomorpha arizonensis[216]DHJPAR0062199|Bulia mexicana|586[1n]|BOLD:AAG7943  
Zelomorpha arizonensis[217]DHJPAR0062200|Bulia mexicana|512[3n]|BOLD:AAG7943  
Zelomorpha arizonensis[218]DHJPAR0062206|Bulia mexicana|586[1n]|BOLD:AAG7943  
Zelomorpha arizonensis[219]DHJPAR0062202|Bulia mexicana|586[0n]|BOLD:AAG7943  
Zelomorpha arizonensis[220]DHJPAR0062207|Bulia mexicana|511[2n]|BOLD:AAG7943  
Zelomorpha arizonensis[221]DHJPAR0062201|Bulia mexicana|586[0n]|BOLD:AAG7943  
Zelomorpha arizonensis[222]DHJPAR0062208|Bulia mexicana|526[3n]|BOLD:AAG7943  
Zelomorpha arizonensis[223]DHJPAR0052702|Bulia mexicana|605[0n]|BOLD:AAG7943  
Zelomorpha arizonensis[224]DHJPAR0062204|Bulia mexicana|615[0n]|BOLD:AAG7943  
Zelomorpha arizonensis[225]DHJPAR0062205|Bulia mexicana|622[0n]|BOLD:AAG7943  
Zelomorpha arizonensis[226]DHJPAR0052705|Bulia mexicana|658[1n]|BOLD:AAG7943  
Zelomorpha arizonensis[227]DHJPAR0052707|Bulia mexicana|658[0n]|BOLD:AAG7943  
Zelomorpha arizonensis[228]DHJPAR0052704|Bulia mexicana|658[0n]|BOLD:AAG7943  
Zelomorpha arizonensis[229]DHJPAR0052708|Bulia mexicana|658[1n]|BOLD:AAG7943  
Zelomorpha arizonensis[230]DHJPAR0052703|Bulia mexicana|658[1n]|BOLD:AAG7943  
Zelomorpha arizonensis[231]DHJPAR0052709|Bulia mexicana|658[0n]|BOLD:AAG7943  
Zelomorpha arizonensis[232]DHJPAR0062203|Bulia mexicana|616[2n]|BOLD:AAG7943  
Zelomorpha donwindsori[233]DHJPAR0052679|Paectes lunodes|573[11n]  
Zelomorpha donwindsori[234]DHJPAR0048721|Paectes fuscescens|658[0n]|BOLD:ACB1906  
Zelomorpha mariyavladimirovnae[235]DHJPAR0023528|Ormetica sicilia|654[0n]|BOLD:ADD0088  
Zelomorpha kellyanneae[236]DHJPAR0029301|Nephodia Janzen18|618[0n]|BOLD:ADD0384  
Zelomorpha kellyanneae[237]DHJPAR0042809|Nephodia Janzen18|658[0n]|BOLD:ADD0384  
Zelomorpha kellyanneae[238]DHJPAR0015543|Nephodia Janzen18|654[0n]|BOLD:ADD0384  
Zelomorpha kellyanneae[239]DHJPAR0015536|Nephodia Janzen18|654[0n]|BOLD:ADD0384  
Zelomorpha kellyanneae[240]DHJPAR0009395|Nephodia Janzen18|609[2n]|BOLD:ADD0384  
Zelomorpha kellyanneae[241]DHJPAR0015542|Nephodia Janzen18|654[0n]|BOLD:ADD0384  
Zelomorpha kellyanneae[242]DHJPAR0042806|Nephodia Janzen18|658[0n]|BOLD:ADD0384  
Zelomorpha kellyanneae[243]DHJPAR0009394|Nephodia Janzen18|654[0n]|BOLD:ADD0384  
Zelomorpha noahjaneae[244]DHJPAR0048723|Paectes fuscescens|658[0n]|BOLD:AAV7758  
Zelomorpha noahjaneae[245]DHJPAR0028023|Paectes Poole10|657[0n]|BOLD:AAV7758  
Zelomorpha noahjaneae[246]DHJPAR0028024|Paectes Poole10|627[0n]|BOLD:AAV7758  
Zelomorpha noahjaneae[247]DHJPAR0052678|Eutelia chrysoterminalis|658[1n]|BOLD:AAV7758  
Zelomorpha noahjaneae[248]DHJPAR0048719|Paectes fuscescens|636[0n]|BOLD:AAV7758  
Zelomorpha noahjaneae[249]DHJPAR0048720|Paectes fuscescens|658[0n]|BOLD:AAV7758  
Zelomorpha effugia[250]DHJPAR0009330|Cosmosoma hercyna|606[8n]  
Zelomorpha effugia[251]DHJPAR0064000|Cosmosoma hercyna|619[0n]|BOLD:ACM2491  
Zelomorpha effugia[252]DHJPAR0009380|Cosmosoma hercyna|615[5n]|BOLD:ACM2491  
Zelomorpha effugia[253]DHJPAR0009337|Cosmosoma hercyna|654[2n]|BOLD:ACM2491  
Zelomorpha effugia[254]DHJPAR0009341|Cosmosoma hercyna|654[2n]|BOLD:ACM2491  
Zelomorpha effugia[255]DHJPAR0009336|Cosmosoma hercyna|651[4n]|BOLD:ACM2491  
Zelomorpha effugia[256]DHJPAR0009332|Cosmosoma hercyna|654[4n]|BOLD:ACM2491  
Zelomorpha effugia[257]DHJPAR0009333|Cosmosoma hercyna|654[3n]|BOLD:ACM2491  
Zelomorpha effugia[258]DHJPAR0009328|Cosmosoma hercyna|654[2n]|BOLD:ACM2491  
Zelomorpha effugia[259]DHJPAR0015545|Cosmosoma hercyna|645[0n]|BOLD:ACM2491  
Zelomorpha effugia[260]DHJPAR0009342|Cosmosoma hercyna|651[6n]|BOLD:ACM2491  
Zelomorpha effugia[261]DHJPAR0009334|Cosmosoma hercyna|654[1n]|BOLD:ACM2491  
Zelomorpha effugia[262]DHJPAR0009331|Cosmosoma hercyna|654[1n]|BOLD:ACM2491  
Zelomorpha effugia[263]DHJPAR0009379|Cosmosoma hercyna|654[1n]|BOLD:ACM2491  
Zelomorpha effugia[264]DHJPAR0015546|Cosmosoma hercyna|654[0n]|BOLD:ACM2491  
Zelomorpha effugia[265]DHJPAR0057452|Cosmosoma hercyna|658[0n]|BOLD:ACM2491  
Zelomorpha effugia[266]DHJPAR0057455|Cosmosoma hercyna|658[0n]|BOLD:ACM2491  
Zelomorpha effugia[267]DHJPAR0015535|Cosmosoma hercyna|654[0n]|BOLD:ACM2491  
Zelomorpha effugia[268]DHJPAR0056359|Cosmosoma hercyna|658[0n]|BOLD:ACM2491  
Zelomorpha effugia[269]DHJPAR0057453|Cosmosoma hercyna|658[0n]|BOLD:ACM2491  
Zelomorpha effugia[270]DHJPAR0009343|Cosmosoma hercyna|654[0n]|BOLD:ACM2491  
Zelomorpha effugia[271]DHJPAR0054472|Cosmosoma hercyna|658[0n]|BOLD:ACM2491  
Zelomorpha effugia[272]DHJPAR0017278|Cosmosoma hercyna|654[0n]|BOLD:ACM2491  
Zelomorpha effugia[273]DHJPAR0017281|Cosmosoma hercyna|654[0n]|BOLD:ACM2491  
Zelomorpha effugia[274]DHJPAR0015551|Cosmosoma hercyna|654[0n]|BOLD:ACM2491  
Zelomorpha effugia[275]DHJPAR0009432|Cosmosoma hercyna|654[0n]|BOLD:ACM2491  
Zelomorpha effugia[276]DHJPAR0015544|Cosmosoma hercyna|654[0n]|BOLD:ACM2491  
Zelomorpha effugia[277]DHJPAR0015541|Cosmosoma hercyna|654[0n]|BOLD:ACM2491  
Zelomorpha effugia[278]DHJPAR0017283|Cosmosoma hercyna|654[0n]|BOLD:ACM2491  
Zelomorpha effugia[279]DHJPAR0054516|Cosmosoma hercyna|658[0n]|BOLD:ACM2491  
Zelomorpha effugia[280]DHJPAR0017282|Cosmosoma hercyna|654[0n]|BOLD:ACM2491  
Zelomorpha effugia[281]DHJPAR0015547|Cosmosoma hercyna|654[0n]|BOLD:ACM2491  
Zelomorpha effugia[282]DHJPAR0017279|Cosmosoma hercyna|654[0n]|BOLD:ACM2491  
Zelomorpha effugia[283]DHJPAR0054479|Cosmosoma hercyna|658[0n]|BOLD:ACM2491  
Zelomorpha effugia[284]DHJPAR0057456|Cosmosoma hercyna|658[0n]|BOLD:ACM2491  
Zelomorpha effugia[285]DHJPAR0054474|Cosmosoma hercyna|658[0n]|BOLD:ACM2491  
Zelomorpha effugia[286]DHJPAR0054483|Cosmosoma hercyna|658[0n]|BOLD:ACM2491  
Zelomorpha effugia[287]DHJPAR0054475|Cosmosoma hercyna|658[0n]|BOLD:ACM2491  
Zelomorpha effugia[288]DHJPAR0017280|Cosmosoma hercyna|654[0n]|BOLD:ACM2491  
Zelomorpha effugia[289]DHJPAR0015550|Cosmosoma hercyna|654[0n]|BOLD:ACM2491  
Zelomorpha effugia[290]DHJPAR0057454|Cosmosoma hercyna|658[0n]|BOLD:ACM2491  
Zelomorpha effugia[291]DHJPAR0054489|Cosmosoma hercyna|658[0n]|BOLD:ACM2491  
Zelomorpha effugia[292]DHJPAR0015552|Cosmosoma hercyna|654[0n]|BOLD:ACM2491  
Zelomorpha effugia[293]DHJPAR0015549|Cosmosoma hercyna|654[0n]|BOLD:ACM2491  
Zelomorpha effugia[294]DHJPAR0015538|Cosmosoma hercyna|654[0n]|BOLD:ACM2491  
Zelomorpha effugia[295]DHJPAR0009338|Cosmosoma hercyna|651[3n]|BOLD:ACM2491  
Zelomorpha effugia[296]DHJPAR0009329|Cosmosoma hercyna|654[2n]|BOLD:ACM2491  
Zelomorpha effugia[297]DHJPAR0009431|Cosmosoma hercyna|654[3n]|BOLD:ACM2491  
Zelomorpha effugia[298]DHJPAR0054473|Cosmosoma hercyna|615[0n]|BOLD:ACM2491  
Zelomorpha effugia[299]DHJPAR0054482|Cosmosoma hercyna|647[0n]|BOLD:ACM2491

Zelomorpha effugia[297]DHJPAAK0009451Cosmosoma hercyna[654]5n[BOLD:ACM2491  
Zelomorpha effugia[298]DHJPAAK0009451Cosmosoma hercyna[615]0n[BOLD:ACM2491  
Zelomorpha effugia[299]DHJPAAK0009451Cosmosoma hercyna[647]0n[BOLD:ACM2491  
Zelomorpha effugia[300]DHJPAAK0009381Cosmosoma hercyna[606]1n[BOLD:ACM2491  
Zelomorpha effugia[301]BIOUG19932-H06ESG Malaise Trap588[0n]BOLD:ACM2491  
Zelomorpha effugia[302]DHJPAAK0009340Cosmosoma hercyna[576]0n[BOLD:ACM2491  
Zelomorpha effugia[303]DHJPAAK0009339Cosmosoma hercyna[594]0n[BOLD:ACM2491  
Zelomorpha effugia[304]DHJPAAK0009335Cosmosoma hercyna[651]3n[BOLD:ACM2491  
Zelomorpha effugia[305]DHJPAAK0054484Cosmosoma hercyna[658]0n[BOLD:ACM2491  
Zelomorpha effugia[306]DHJPAAK0054476Cosmosoma hercyna[658]0n[BOLD:ACM2491  
Zelomorpha effugia[307]DHJPAAK0054481Cosmosoma hercyna[658]0n[BOLD:ACM2491  
Zelomorpha effugia[308]DHJPAAK0017275Cosmosoma hercyna[654]0n[BOLD:ACM2491  
Zelomorpha effugia[309]DHJPAAK0015548Cosmosoma hercyna[654]0n[BOLD:ACM2491  
Zelomorpha effugia[310]DHJPAAK0056979Cosmosoma hercyna[658]0n[BOLD:ACM2491  
Zelomorpha effugia[311]DHJPAAK0054478Cosmosoma hercyna[658]0n[BOLD:ACM2491  
Zelomorpha effugia[312]DHJPAAK0015553Cosmosoma hercyna[654]0n[BOLD:ACM2491  
Zelomorpha effugia[313]DHJPAAK0054477Cosmosoma hercyna[658]0n[BOLD:ACM2491  
Zelomorpha effugia[314]DHJPAAK0062008Rhynchopyga cryptoleuca[658]0n[BOLD:ACM2491  
Zelomorpha sp.[315]BIOUG27761-E02ESG Malaise Trap Year 2[594]0n[BOLD:AEF3784  
Zelomorpha sp.[316]BIOUG55300-F02Malaise trap PL12-3D[644]0n[BOLD:AAV3008  
Zelomorpha sp.[317]BIOUG53753-A11Malaise trap PL12-7D[652]0n[BOLD:AAV3008  
Zelomorpha sarahmeierottoae[318]BIOUG05883-E01BSE Malaise Trap[658]1n[BOLD:ACG5511  
Zelomorpha mikeiviei[319]DHJPAAK0029297geoJanzen01 geo9455[621]0n[BOLD:ADC9455  
Zelomorpha mikeiviei[320]DHJPAAK0040325geoJanzen01 geo9455[658]0n[BOLD:ADC9455  
Zelomorpha mikeiviei[321]DHJPAAK0058546geoJanzen01 geo9455[229]2n  
Zelomorpha bobandersoni[322]DHJPAAK0064390Hemiceras plusiata[605]1n[BOLD:ACN0769  
Zelomorpha bobandersoni[323]DHJPAAK0036332Hemiceras plusiata[521]0n[BOLD:ACN0769  
Zelomorpha bobandersoni[324]DHJPAAK0036330Hemiceras plusiata[622]0n[BOLD:ACN0769  
Zelomorpha bobandersoni[325]DHJPAAK0052686Hemiceras plusiata[658]1n[BOLD:ACN0769  
Zelomorpha bobandersoni[326]DHJPAAK0057648Hemiceras plusiata[658]1n[BOLD:ACN0769  
Zelomorpha bobandersoni[327]DHJPAAK0059599Hemiceras plusiata[657]0n[BOLD:ACN0769  
Zelomorpha bobandersoni[328]DHJPAAK0059338Hemiceras plusiata[657]0n[BOLD:ACN0769  
Zelomorpha bobandersoni[329]DHJPAAK0061033Hemiceras plusiata[658]0n[BOLD:ACN0769  
Zelomorpha bobandersoni[330]DHJPAAK0059335Hemiceras plusiata[657]1n[BOLD:ACN0769  
Zelomorpha bobandersoni[331]DHJPAAK0063377Hemiceras plusiata[628]0n[BOLD:ACN0769  
Zelomorpha bobandersoni[332]DHJPAAK0063376Hemiceras plusiata[609]2n[BOLD:ACN0769  
Zelomorpha bobandersoni[333]DHJPAAK0059600Hemiceras plusiata[612]0n[BOLD:ACN0769  
Zelomorpha bobandersoni[334]DHJPAAK0059334Hemiceras plusiata[611]1n[BOLD:ACN0769  
Zelomorpha bobandersoni[335]DHJPAAK0063375Hemiceras plusiata[631]0n[BOLD:ACN0769  
Zelomorpha bobandersoni[336]DHJPAAK0062012Hemiceras plusiata[633]1n[BOLD:ACN0769  
Zelomorpha bobandersoni[337]DHJPAAK0009345Hemiceras plusiata[573]2n[BOLD:ACN0769  
Zelomorpha bobandersoni[338]DHJPAAK0028037Hemiceras plusiata[627]0n[BOLD:ACN0769  
Zelomorpha bobandersoni[339]DHJPAAK0057650Hemiceras plusiata[658]1n[BOLD:ACN0769  
Zelomorpha bobandersoni[340]DHJPAAK0009346Hemiceras plusiata[658]1n[BOLD:ACN0769  
Zelomorpha johnchemsaki[341]DHJPAAK0036324Hemiceras pallidula[507]0n[BOLD:ADD0338  
Zelomorpha johnchemsaki[342]DHJPAAK0036327Hemiceras pallidula[622]5n[BOLD:ADD0338  
Zelomorpha johnchemsaki[343]DHJPAAK0036326Hemiceras pallidula[622]1n[BOLD:ADD0338  
Zelomorpha johnchemsaki[344]DHJPAAK0036325Hemiceras pallidula[622]1n[BOLD:ADD0338  
Zelomorpha johnchemsaki[345]DHJPAAK0036328Hemiceras pallidula[622]1n[BOLD:ADD0338  
Zelomorpha johnchemsaki[346]DHJPAAK0023296Hemiceras pallidula[658]2n[BOLD:ADD0338  
Zelomorpha johnchemsaki[347]DHJPAAK0040546Hemiceras pallidula[658]1n[BOLD:ADD0338  
Zelomorpha johnchemsaki[348]DHJPAAK0036368Hemiceras pallidula[658]1n[BOLD:ADD0338  
Zelomorpha johnchemsaki[349]DHJPAAK0040541Hemiceras pallidula[658]1n[BOLD:ADD0338  
Zelomorpha johnchemsaki[350]DHJPAAK0040540Hemiceras pallidula[658]1n[BOLD:ADD0338  
Zelomorpha johnchemsaki[351]DHJPAAK0040543Hemiceras pallidula[658]1n[BOLD:ADD0338  
Zelomorpha johnchemsaki[352]DHJPAAK0040538Hemiceras pallidula[658]1n[BOLD:ADD0338  
Zelomorpha johnchemsaki[353]DHJPAAK0040536Hemiceras pallidula[658]1n[BOLD:ADD0338  
Zelomorpha johnchemsaki[354]DHJPAAK0040547Hemiceras pallidula[640]1n[BOLD:ADD0338  
Zelomorpha johnchemsaki[355]DHJPAAK0040535Hemiceras pallidula[658]1n[BOLD:ADD0338  
Zelomorpha johnchemsaki[356]DHJPAAK0040537Hemiceras pallidula[658]1n[BOLD:ADD0338  
Zelomorpha johnchemsaki[357]DHJPAAK0036369Hemiceras pallidula[658]1n[BOLD:ADD0338  
Zelomorpha johnchemsaki[358]DHJPAAK0040545Hemiceras pallidula[658]1n[BOLD:ADD0338  
Zelomorpha johnchemsaki[359]DHJPAAK0040542Hemiceras pallidula[658]1n[BOLD:ADD0338  
Zelomorpha johnchemsaki[360]DHJPAAK0040544Hemiceras pallidula[658]1n[BOLD:ADD0338  
Zelomorpha johnchemsaki[361]DHJPAAK0040539Hemiceras pallidula[658]1n[BOLD:ADD0338  
Zelomorpha angelsolisi[362]DHJPAAK0015578Chabora repugnalisDHJ01499[25n]  
Zelomorpha angelsolisi[363]DHJPAAK0015577Chabora repugnalisDHJ01551[16n]  
Zelomorpha angelsolisi[364]DHJPAAK0015592Chabora repugnalisDHJ01390[5n]  
Zelomorpha angelsolisi[365]DHJPAAK0015584Chabora repugnalisDHJ01600[0n]BOLD:AAT9451  
Zelomorpha angelsolisi[366]DHJPAAK0009318Azeta ceramina[606]3n[BOLD:AAT9451  
Zelomorpha angelsolisi[367]DHJPAAK0009317Azeta ceramina[621]0n[BOLD:AAT9451  
Zelomorpha angelsolisi[368]DHJPAAK0015593Chabora repugnalisDHJ01618[0n]BOLD:AAT9451  
Zelomorpha angelsolisi[369]DHJPAAK0009321Azeta ceramina[618]0n[BOLD:AAT9451  
Zelomorpha angelsolisi[370]DHJPAAK0029184Coenipeta bibitrix[621]0n[BOLD:AAT9451  
Zelomorpha angelsolisi[371]DHJPAAK0028275Azeta ceramina[618]0n[BOLD:AAT9451  
Zelomorpha angelsolisi[372]DHJPAAK0009310Azeta ceramina[621]0n[BOLD:AAT9451  
Zelomorpha angelsolisi[373]DHJPAAK0009313Azeta ceramina[621]0n[BOLD:AAT9451  
Zelomorpha angelsolisi[374]DHJPAAK0009319Azeta ceramina[621]0n[BOLD:AAT9451  
Zelomorpha angelsolisi[375]DHJPAAK0028276Azeta ceramina[624]0n[BOLD:AAT9451  
Zelomorpha angelsolisi[376]BIOUG55293-G04Malaise trap PL12-3D[654]0n[BOLD:AAT9451  
Zelomorpha angelsolisi[377]DHJPAAK0021152Azeta ceramina[594]0n[BOLD:AAT9451  
Zelomorpha angelsolisi[378]DHJPAAK0015590Coenipeta bibitrix[642]4n[BOLD:AAT9451  
Zelomorpha angelsolisi[379]BIOUG55221-C10Malaise trap PL12-3D[654]0n[BOLD:AAT9451  
Zelomorpha angelsolisi[380]BIOUG55356-A08Malaise trap PL12-9D[654]0n[BOLD:AAT9451  
Zelomorpha angelsolisi[381]BIOUG53713-E04Malaise trap PL12-5C[654]0n[BOLD:AAT9451  
Zelomorpha angelsolisi[382]BIOUG55357-G01Malaise trap PL12-9D[652]0n[BOLD:AAT9451  
Zelomorpha angelsolisi[383]BIOUG55356-F11Malaise trap PL12-9D[654]0n[BOLD:AAT9451  
Zelomorpha angelsolisi[384]BIOUG52716-E05Malaise trap PL12-9C[655]0n[BOLD:AAT9451  
Zelomorpha angelsolisi[385]BIOUG52715-B08Malaise trap PL12-9C[654]0n[BOLD:AAT9451  
Zelomorpha angelsolisi[386]BIOUG52715-B10Malaise trap PL12-9C[654]0n[BOLD:AAT9451  
Zelomorpha angelsolisi[387]BIOUG55358-D07Malaise trap PL12-9D[655]0n[BOLD:AAT9451  
Zelomorpha angelsolisi[388]BIOUG51774-B03Malaise trap PL12-3C[652]0n[BOLD:AAT9451  
Zelomorpha angelsolisi[389]BIOUG53714-E11Malaise trap PL12-5C[653]0n[BOLD:AAT9451  
Zelomorpha angelsolisi[390]BIOUG55358-D11Malaise trap PL12-9D[655]0n[BOLD:AAT9451  
Zelomorpha angelsolisi[391]BIOUG52716-E09Malaise trap PL12-9C[654]0n[BOLD:AAT9451  
Zelomorpha angelsolisi[392]BIOUG55242-G07Malaise trap PL12-5C[653]0n[BOLD:AAT9451  
Zelomorpha angelsolisi[393]BIOUG53713-E02Malaise trap PL12-5C[654]0n[BOLD:AAT9451  
Zelomorpha angelsolisi[394]BIOUG53713-E06Malaise trap PL12-5C[654]0n[BOLD:AAT9451  
Zelomorpha angelsolisi[395]BIOUG52715-B06Malaise trap PL12-9C[654]0n[BOLD:AAT9451  
Zelomorpha angelsolisi[396]BIOUG52716-E08Malaise trap PL12-9C[653]0n[BOLD:AAT9451  
Zelomorpha angelsolisi[397]BIOUG51774-A05Malaise trap PL12-3C[651]0n[BOLD:AAT9451  
Zelomorpha angelsolisi[398]BIOUG55357-F12Malaise trap PL12-9D[655]0n[BOLD:AAT9451  
Zelomorpha angelsolisi[399]BIOUG52720-B07Malaise trap PL12-9C[651]0n[BOLD:AAT9451

Zelomorpha angelsolisi[397]BIUG51774-A05|Malaise trap PL12-3C|651[0n]|BOLD:AAT9451  
 Zelomorpha angelsolisi[398]BIUG55357-F12|Malaise trap PL12-9D|655[0n]|BOLD:AAT9451  
 Zelomorpha angelsolisi[399]BIUG52720-B07|Malaise trap PL12-9C|651[0n]|BOLD:AAT9451  
 Zelomorpha angelsolisi[400]BIUG55331-E03|Malaise trap PL12-6D|651[0n]|BOLD:AAT9451  
 Zelomorpha angelsolisi[401]DHJPAR0040234|Macaria abydataDHJ01|651[0n]|BOLD:AAT9451  
 Zelomorpha angelsolisi[402]BIUG53729-G01|Malaise trap PL12-3D|654[0n]|BOLD:AAT9451  
 Zelomorpha angelsolisi[403]DHJPAR0009315|Azeta ceramina|654[1n]|BOLD:AAT9451  
 Zelomorpha angelsolisi[404]DHJPAR0009312|Azeta ceramina|654[0n]|BOLD:AAT9451  
 Zelomorpha angelsolisi[405]BIUG08539-A09|BSE Malaise Trap|658[0n]|BOLD:AAT9451  
 Zelomorpha angelsolisi[406]DHJPAR0015556|Coenipeta bibitrix|654[0n]|BOLD:AAT9451  
 Zelomorpha angelsolisi[407]DHJPAR0009314|Azeta ceramina|654[0n]|BOLD:AAT9451  
 Zelomorpha angelsolisi[408]DHJPAR0015588|Coenipeta bibitrix|654[1n]|BOLD:AAT9451  
 Zelomorpha angelsolisi[409]DHJPAR0009311|Azeta ceramina|654[3n]|BOLD:AAT9451  
 Zelomorpha angelsolisi[410]DHJPAR0009323|Azeta ceramina|654[3n]|BOLD:AAT9451  
 Zelomorpha angelsolisi[411]DHJPAR0009320|Azeta ceramina|579[2n]|BOLD:AAT9451  
 Zelomorpha angelsolisi[412]DHJPAR0029181|Azeta ceramina|282[0n]|  
 Zelomorpha angelsolisi[413]DHJPAR0009314|Azeta ceramina|519[0n]|BOLD:AAT9451  
 Zelomorpha angelsolisi[414]DHJPAR0009322|Azeta ceramina|558[1n]|BOLD:AAT9451

Alabagrus jeanmarieadioui[415]DHJPAR0015507|Desmia ploralisDHJ02|654[0n]|BOLD:AAT9514  
 Alabagrus jeanmarieadioui[416]DHJPAR0052691|Desmia ploralisDHJ03|658[0n]|BOLD:AAT9514  
 Alabagrus jeanmarieadioui[417]DHJPAR0028030|Desmia ploralisDHJ03|658[0n]|BOLD:AAT9514  
 Alabagrus jeanmarieadioui[418]DHJPAR0048717|Desmia ploralisDHJ03|658[0n]|BOLD:AAT9514  
 Alabagrus jeanmarieadioui[419]DHJPAR0045797|Desmia ploralisDHJ03|658[0n]|BOLD:AAT9514  
 Alabagrus jeanmarieadioui[420]DHJPAR0037934|Desmia ploralisDHJ03|658[0n]|BOLD:AAT9514  
 Alabagrus jeanmarieadioui[421]DHJPAR0052695|Desmia ploralisDHJ03|626[1n]|BOLD:AAT9514  
 Alabagrus jeanmarieadioui[422]DHJPAR0037954|Desmia ploralisDHJ04|658[0n]|BOLD:AAT9514  
 Alabagrus jeanmarieadioui[423]DHJPAR0037905|Desmia Solis100|658[0n]|BOLD:AAT9514  
 Alabagrus jeanmarieadioui[424]DHJPAR0044987|Desmia ploralisDHJ03|658[0n]|BOLD:AAT9514  
 Alabagrus jeanmarieadioui[425]DHJPAR0044985|Desmia ploralisDHJ03|658[0n]|BOLD:AAT9514  
 Alabagrus jeanmarieadioui[426]DHJPAR0052690|Desmia ploralisDHJ03|658[0n]|BOLD:AAT9514  
 Alabagrus jeanmarieadioui[427]DHJPAR0044989|Desmia ploralisDHJ03|658[0n]|BOLD:AAT9514  
 Alabagrus jeanmarieadioui[428]DHJPAR0051346|Desmia ploralisDHJ01|658[0n]|BOLD:AAT9514  
 Alabagrus jeanmarieadioui[429]DHJPAR0023534|Desmia ploralisDHJ06|654[0n]|BOLD:AAT9514  
 Alabagrus jeanmarieadioui[430]DHJPAR0037893|Desmia Solis19|658[0n]|BOLD:AAT9514  
 Alabagrus jeanmarieadioui[431]DHJPAR0045796|Desmia ploralisDHJ01|658[0n]|BOLD:AAT9514  
 Alabagrus jeanmarieadioui[432]DHJPAR0038804|Desmia ploralisDHJ04|658[0n]|BOLD:AAT9514  
 Alabagrus jeanmarieadioui[433]DHJPAR0052084|Desmia ploralisDHJ03|658[0n]|BOLD:AAT9514  
 Alabagrus jeanmarieadioui[434]DHJPAR0053592|Desmia octomaculalis|658[0n]|BOLD:AAT9514  
 Alabagrus jeanmarieadioui[435]DHJPAR0048716|Desmia ploralisDHJ03|658[0n]|BOLD:AAT9514  
 Alabagrus jeanmarieadioui[436]DHJPAR0037901|Desmia Solis100|658[0n]|BOLD:AAT9514  
 Alabagrus jeanmarieadioui[437]DHJPAR0015508|Desmia Janzen09|654[0n]|BOLD:AAT9514  
 Alabagrus jeanmarieadioui[438]DHJPAR0036710|Desmia ploralisDHJ03|632[0n]|BOLD:AAT9514  
 Alabagrus jeanmarieadioui[439]DHJPAR0041190|Desmia Solis100|623[3n]|BOLD:AAT9514  
 Alabagrus jeanmarieadioui[440]DHJPAR0041193|Desmia ploralisDHJ03|624[0n]|BOLD:AAT9514  
 Alabagrus jeanmarieadioui[441]DHJPAR0009425|Desmia ploralisDHJ03|651[0n]|BOLD:AAT9514  
 Alabagrus jeanmarieadioui[442]DHJPAR0036687|Desmia ploralisDHJ03|627[0n]|BOLD:AAT9514  
 Alabagrus jeanmarieadioui[443]DHJPAR0041204|Desmia Solis100|624[1n]|BOLD:AAT9514  
 Alabagrus jeanmarieadioui[444]DHJPAR0041206|Desmia ploralisDHJ03|624[1n]|BOLD:AAT9514  
 Alabagrus jeanmarieadioui[445]DHJPAR0037903|Desmia Solis100|658[0n]|BOLD:AAT9514  
 Alabagrus jeanmarieadioui[446]DHJPAR0037904|Desmia Solis100|658[0n]|BOLD:AAT9514  
 Alabagrus jeanmarieadioui[447]DHJPAR0010513|Desmia ploralisDHJ03|658[0n]|BOLD:AAT9514  
 Alabagrus jeanmarieadioui[448]DHJPAR0015509|Desmia ploralisDHJ03|654[0n]|BOLD:AAT9514  
 Alabagrus jeanmarieadioui[449]DHJPAR0055969|Desmia ploralisDHJ03|670[0n]|BOLD:AAT9514  
 Alabagrus jeanmarieadioui[450]DHJPAR0045807|Desmia ploralisDHJ01|658[0n]|BOLD:AAT9514  
 Alabagrus jeanmarieadioui[451]DHJPAR0049656|Desmia ploralisDHJ03|658[0n]|BOLD:AAT9514  
 Alabagrus jeanmarieadioui[452]DHJPAR0046751|Desmia ploralisDHJ01|658[0n]|BOLD:AAT9514  
 Alabagrus jeanmarieadioui[453]DHJPAR0046752|Desmia ploralisDHJ01|658[0n]|BOLD:AAT9514  
 Alabagrus jeanmarieadioui[454]DHJPAR0048730|Desmia ploralisDHJ03|658[0n]|BOLD:AAT9514  
 Alabagrus jeanmarieadioui[455]DHJPAR0009430|Desmia ploralisDHJ03|624[0n]|BOLD:AAT9514  
 Alabagrus jeanmarieadioui[456]DHJPAR0009427|Desmia ploralisDHJ03|624[0n]|BOLD:AAT9514  
 Alabagrus jeanmarieadioui[457]DHJPAR0009424|Desmia Janzen09|651[0n]|BOLD:AAT9514  
 Alabagrus jeanmarieadioui[458]DHJPAR0009416|Desmia ploralisDHJ03|651[0n]|BOLD:AAT9514  
 Alabagrus jeanmarieadioui[459]DHJPAR0009429|Desmia ploralisDHJ03|651[0n]|BOLD:AAT9514  
 Alabagrus jeanmarieadioui[460]DHJPAR0009428|Desmia ploralisDHJ03|651[0n]|BOLD:AAT9514  
 Alabagrus jeanmarieadioui[461]DHJPAR0036704|Desmia ploralisDHJ03|625[0n]|BOLD:AAT9514  
 Alabagrus jeanmarieadioui[462]DHJPAR0037921|Desmia Solis100|658[0n]|BOLD:AAT9514  
 Alabagrus jeanmarieadioui[463]DHJPAR0036702|Desmia Solis100|658[0n]|BOLD:AAT9514  
 Alabagrus jeanmarieadioui[464]DHJPAR0045806|Desmia ploralisDHJ01|658[0n]|BOLD:AAT9514  
 Alabagrus jeanmarieadioui[465]DHJPAR0037918|Desmia ploralisDHJ04|658[0n]|BOLD:AAT9514  
 Alabagrus jackiemillerae[466]DHJPAR0057450|Rhetrocraspeda Solis05|658[4n]  
 Alabagrus jackiemillerae[467]DHJPAR0037886|Herpetogramma Solis11|658[2n]|BOLD:ACD1741  
 Alabagrus jackiemillerae[468]DHJPAR0048729|Desmia Solis19|658[0n]|BOLD:ACD1741  
 Alabagrus jackiemillerae[469]DHJPAR0057448|Desmia Solis19|658[0n]|BOLD:ACD1741  
 Alabagrus jackiemillerae[470]DHJPAR0052682|Patania Solis03|658[0n]|BOLD:ACD1741  
 Alabagrus jackiemillerae[471]DHJPAR0053593|Desmia Janzen07|658[0n]|BOLD:ACD1741  
 Alabagrus jackiemillerae[472]DHJPAR0045805|spiloBioLep01 BioLep403|658[0n]|BOLD:ACD1741  
 Alabagrus jackiemillerae[473]DHJPAR0041165|Desmia Solis19|583[0n]|BOLD:ACD1741  
 Alabagrus jackiemillerae[474]DHJPAR0051668|Phostria Janzen05|613[2n]|BOLD:ACD1741  
 Alabagrus jackiemillerae[475]DHJPAR0053596|Herpetogramma Solis11|658[0n]|BOLD:ACD1741  
 Alabagrus jackiemillerae[476]DHJPAR0045803|spiloBioLep01 BioLep403|658[0n]|BOLD:ACD1741  
 Alabagrus jackiemillerae[477]DHJPAR0045802|spiloBioLep01 BioLep403|658[0n]|BOLD:ACD1741  
 Alabagrus jackiemillerae[478]DHJPAR0057446|Phostria Janzen05|658[1n]|BOLD:ACD1741  
 Alabagrus jackiemillerae[479]DHJPAR0046753|Pilrocicis purpurascens|658[1n]|BOLD:ACD1741  
 Alabagrus jackiemillerae[480]DHJPAR0038805|Herpetogramma Solis11|658[0n]|BOLD:ACD1741  
 Alabagrus jackiemillerae[481]DHJPAR0057439|Desmia Solis19|658[0n]|BOLD:ACD1741  
 Alabagrus jackiemillerae[482]DHJPAR0057441|Desmia Solis19|658[0n]|BOLD:ACD1741  
 Alabagrus jackiemillerae[483]DHJPAR0057445|Rhetrocraspeda Solis05|658[0n]|BOLD:ACD1741  
 Alabagrus jackiemillerae[484]DHJPAR0057440|Desmia Solis19|658[0n]|BOLD:ACD1741  
 Alabagrus jackiemillerae[485]DHJPAR0054491|Rhetrocraspeda Janzen347|658[0n]|BOLD:ACD1741  
 Alabagrus jackiemillerae[486]DHJPAR0052078|Herpetogramma Solis11|658[0n]|BOLD:ACD1741  
 Alabagrus jackiemillerae[487]DHJPAR0054492|Rhetrocraspeda Janzen347|658[0n]|BOLD:ACD1741  
 Alabagrus jackiemillerae[488]DHJPAR0045798|Herpetogramma salbialis|658[0n]|BOLD:ACD1741  
 Alabagrus jackiemillerae[489]DHJPAR0037895|Desmia Solis19|658[1n]|BOLD:ACD1741  
 Alabagrus fernandodiasii[490]DHJPAR0050360|Desmia benealisDHJ02|658[0n]|BOLD:ACD1742  
 Alabagrus fernandodiasii[491]DHJPAR0048732|Herpetogramma Solis11|658[0n]|BOLD:ACD1742  
 Alabagrus fernandodiasii[492]DHJPAR0046750|Rhetrocraspeda periusalis|658[0n]|BOLD:ACD1742  
 Alabagrus fernandodiasii[493]DHJPAR0054488|Herpetogramma Solis11|658[0n]|BOLD:ACD1742  
 Alabagrus fernandodiasii[494]DHJPAR0055818|Herpetogramma Solis11|670[0n]|BOLD:ACD1742  
 Alabagrus fernandodiasii[495]DHJPAR0052085|Herpetogramma Solis11|658[1n]|BOLD:ACD1742  
 Alabagrus fernandodiasii[496]DHJPAR0045800|spiloBioLep01 BioLep402|658[0n]|BOLD:ACD1742  
 Alabagrus fernandodiasii[497]DHJPAR0009377|Herpetogramma Solis10|651[0n]|BOLD:ACD1742  
 Alabagrus fernandodiasii[498]DHJPAR0040215|Herpetogramma Solis11|651[0n]|BOLD:ACD1742  
 Alabagrus fernandodiasii[499]DHJPAR0040215|Herpetogramma Solis11|658[0n]|BOLD:ACD1742

Alabagrus fernandodiasi[497]|DHJP0009377|Herpetogramma Solis10|651|0n|BOLD:ACD1742  
 Alabagrus fernandodiasi[498]|DHJP00040215|Herpetogramma Solis11|651|0n|BOLD:ACD1742  
 Alabagrus fernandodiasi[499]|DHJP00048731|Herpetogramma Solis11|658|0n|BOLD:ACD1742  
 Alabagrus fernandodiasi[500]|DHJP00057002|spiloBioLep01 BioLep415|658|0n|BOLD:ACD1742  
 Alabagrus fernandodiasi[501]|DHJP00055236|Herpetogramma Solis11|658|0n|BOLD:ACD1742  
 Alabagrus fernandodiasi[502]|DHJP00037883|Rhectocraspeda Janzen347|658|0n|BOLD:ACD1742  
 Alabagrus fernandodiasi[503]|DHJP00042804|Rhectocraspeda periusalis|658|0n|BOLD:ACD1742  
 Alabagrus fernandodiasi[504]|DHJP00044991|spiloBioLep01 BioLep403|658|0n|BOLD:ACD1742  
 Alabagrus fernandodiasi[505]|DHJP00045801|Herpetogramma Solis11|658|0n|BOLD:ACD1742  
 Alabagrus fernandodiasi[506]|DHJP00052080|spiloBioLep01 BioLep414|658|0n|BOLD:ACD1742  
 Alabagrus fernandodiasi[507]|DHJP00055088|Herpetogramma Solis11|658|0n|BOLD:ACD1742  
 Alabagrus fernandodiasi[508]|DHJP00017273|Herpetogramma Solis11|654|0n|BOLD:ACD1742  
 Alabagrus fernandodiasi[509]|DHJP00052090|Desmia Janzen19|658|1n|BOLD:ACD1742  
 Alabagrus fernandodiasi[510]|DHJP00054490|spiloBioLep01 BioLep243|658|1n|BOLD:ACD1742  
 Alabagrus fernandodiasi[511]|DHJP00056299|Rhectocraspeda Solis05|658|0n|BOLD:ACD1742  
 Alabagrus fernandodiasi[512]|DHJP00045804|spiloBioLep01 BioLep403|625|1n|BOLD:ACD1742  
 Alabagrus fernandodiasi[513]|DHJP00045799|spiloBioLep01 BioLep402|633|0n|BOLD:ACD1742  
 Alabagrus fernandodiasi[514]|DHJP00037890|Rhectocraspeda Janzen347|604|4n|  
 Alabagrus fernandodiasi[515]|DHJP00021198|Herpetogramma Solis11|654|0n|BOLD:ACD1742  
 Alabagrus fernandodiasi[516]|DHJP00055098|Rhectocraspeda periusalis|658|2n|BOLD:ACD1742  
 Alabagrus fernandodiasi[517]|DHJP00052081|spiloBioLep01 BioLep414|658|3n|BOLD:ACD1742  
 Alabagrus fernandodiasi[518]|DHJP00052089|spiloBioLep01 BioLep311|658|0n|BOLD:ACD1742  
 Alabagrus fernandodiasi[519]|DHJP00055099|Rhectocraspeda periusalis|658|0n|BOLD:ACD1742  
 Alabagrus combos[520]|DHJP00046739|Herpetogramma Solis10|658|0n|BOLD:ACD1804  
 Alabagrus combos[521]|DHJP00046734|Herpetogramma Solis10|658|0n|BOLD:ACD1804  
 Alabagrus combos[522]|DHJP00030609|Patania Solis03|654|0n|BOLD:ACD1804  
 Alabagrus combos[523]|DHJP00057437|Herpetogramma salbialis|658|0n|BOLD:ACD1804  
 Alabagrus combos[524]|DHJP00036376|Ategumia lotanalisDHJ09|658|2n|BOLD:ACD1804  
 Alabagrus combos[525]|DHJP00015530|Patania Solis03|654|0n|BOLD:ACD1804  
 Alabagrus combos[526]|DHJP00054498|Ategumia lotanalis|658|4n|  
 Alabagrus combos[527]|DHJP00050368|Herpetogramma salbialis|658|1n|BOLD:ACD1804  
 Alabagrus combos[528]|DHJP00050372|Ategumia lotanalisDHJ09|658|0n|BOLD:ACD1804  
 Alabagrus combos[529]|DHJP00036341|Ategumia lotanalisDHJ09|658|13n|BOLD:ACD1804  
 Alabagrus combos[530]|DHJP00057438|Herpetogramma salbialis|658|0n|BOLD:ACD1804  
 Alabagrus combos[531]|DHJP00057427|Ategumia lotanalis|658|0n|BOLD:ACD1804  
 Alabagrus combos[532]|DHJP00017276|Conchylodes platinialis|654|0n|BOLD:ACD1804  
 Alabagrus combos[533]|DHJP00038812|Rhectocraspeda periusalis|658|0n|BOLD:ACD1804  
 Alabagrus combos[534]|DHJP00037914|Ategumia matutinalisDHJ03|658|0n|BOLD:ACD1804  
 Alabagrus combos[535]|DHJP00037891|Herpetogramma salbialis|658|0n|BOLD:ACD1804  
 Alabagrus combos[536]|DHJP00041185|Herpetogramma salbialis|624|4n|  
 Alabagrus combos[537]|DHJP00037958|Herpetogramma salbialis|658|0n|BOLD:ACD1804  
 Alabagrus combos[538]|DHJP00046735|Ategumia lotanalisDHJ09|658|1n|BOLD:ACD1804  
 Alabagrus combos[539]|DHJP00051383|Patania Solis03|658|0n|BOLD:ACD1804  
 Alabagrus combos[540]|DHJP00058538|Ategumia lotanalis|658|0n|BOLD:ACD1804  
 Alabagrus combos[541]|DHJP00037884|Herpetogramma salbialis|658|0n|BOLD:ACD1804  
 Alabagrus combos[542]|DHJP00037897|Ategumia lotanalis|658|0n|BOLD:ACD1804  
 Alabagrus combos[543]|DHJP00037878|Herpetogramma salbialis|658|0n|BOLD:ACD1804  
 Alabagrus combos[544]|DHJP00038807|Rhectocraspeda periusalis|658|0n|BOLD:ACD1804  
 Alabagrus combos[545]|DHJP00051384|Patania Solis03|658|0n|BOLD:ACD1804  
 Alabagrus combos[546]|DHJP00037898|Ategumia lotanalis|658|0n|BOLD:ACD1804  
 Alabagrus combos[547]|DHJP00055974|Ategumia matutinalis|670|0n|BOLD:ACD1804  
 Alabagrus combos[548]|DHJP00037929|Herpetogramma salbialis|658|0n|BOLD:ACD1804  
 Alabagrus combos[549]|DHJP00042826|spiloJanzen01 Janzen14DHJ02|658|0n|BOLD:ACD1804  
 Alabagrus combos[550]|DHJP00049475|Patania Solis03|658|0n|BOLD:ACD1804  
 Alabagrus combos[551]|DHJP00037879|Herpetogramma salbialis|658|0n|BOLD:ACD1804  
 Alabagrus combos[552]|DHJP00037955|Ategumia matutinalisDHJ03|658|0n|BOLD:ACD1804  
 Alabagrus combos[553]|DHJP00036377|Ategumia lotanalisDHJ09|658|1n|BOLD:ACD1804  
 Alabagrus combos[554]|DHJP00041598|Herpetogramma salbialis|658|0n|BOLD:ACD1804  
 Alabagrus combos[555]|DHJP00041596|Herpetogramma salbialis|658|0n|BOLD:ACD1804  
 Alabagrus combos[556]|DHJP00053607|Herpetogramma salbialis|658|1n|BOLD:ACD1804  
 Alabagrus combos[557]|DHJP00041562|Herpetogramma salbialis|658|0n|BOLD:ACD1804  
 Alabagrus combos[558]|DHJP00053635|Herpetogramma salbialis|658|0n|BOLD:ACD1804  
 Alabagrus combos[559]|DHJP00053295|Ategumia lotanalisDHJ09|654|0n|BOLD:ACD1804  
 Alabagrus combos[560]|DHJP00056358|Ategumia lotanalis|658|0n|BOLD:ACD1804  
 Alabagrus combos[561]|DHJP00055975|Ategumia matutinalis|670|0n|BOLD:ACD1804  
 Alabagrus combos[562]|DHJP00051350|Patania Solis03|626|0n|BOLD:ACD1804  
 Alabagrus combos[563]|DHJP00051354|Patania Solis03|658|1n|BOLD:ACD1804  
 Alabagrus combos[564]|DHJP00035529|Pycnarmon BioLep66|658|0n|BOLD:ACD1804  
 Alabagrus combos[565]|DHJP00054506|Rhectocraspeda periusalis|658|0n|BOLD:ACD1804  
 Alabagrus combos[566]|DHJP00042819|Ategumia lotanalisDHJ08|630|0n|BOLD:ACD1804  
 Alabagrus combos[567]|DHJP00041583|Herpetogramma salbialis|658|0n|BOLD:ACD1804  
 Alabagrus combos[568]|DHJP00009361|Patania Solis03|651|0n|BOLD:ACD1804  
 Alabagrus combos[569]|DHJP00037896|Ategumia matutinalisDHJ03|658|0n|BOLD:ACD1804  
 Alabagrus combos[570]|DHJP00037877|Herpetogramma salbialis|658|0n|BOLD:ACD1804  
 Alabagrus keithwillmotti[571]|DHJP00037912|Desmia Janzen07|658|0n|BOLD:ACJ2565  
 Alabagrus keithwillmotti[572]|DHJP00009389|Pilocrocis Solis20|654|4n|BOLD:ACJ2565  
 Alabagrus keithwillmotti[573]|DHJP00009390|Pilocrocis Solis20|651|3n|BOLD:ACJ2565  
 Alabagrus keithwillmotti[574]|DHJP00009386|Pilocrocis Solis20|648|5n|BOLD:ACJ2565  
 Alabagrus keithwillmotti[575]|DHJP00037907|Desmia Janzen07|658|0n|BOLD:ACJ2565  
 Alabagrus keithwillmotti[576]|DHJP00037909|Desmia Janzen07|658|0n|BOLD:ACJ2565  
 Alabagrus keithwillmotti[577]|DHJP00037911|Desmia Janzen07|658|0n|BOLD:ACJ2565  
 Alabagrus keithwillmotti[578]|DHJP00037913|Desmia Janzen07|658|0n|BOLD:ACJ2565  
 Alabagrus keithwillmotti[579]|DHJP00037910|Desmia Janzen07|658|0n|BOLD:ACJ2565  
 Alabagrus keithwillmotti[580]|DHJP00009387|Pilocrocis Solis20|654|1n|BOLD:ACJ2565  
 Alabagrus keithwillmotti[581]|DHJP00009388|Pilocrocis Solis20|654|1n|BOLD:ACJ2565  
 Alabagrus keithwillmotti[582]|DHJP00009385|Pilocrocis Solis20|654|6n|BOLD:ACJ2565  
 Alabagrus keithwillmotti[583]|DHJP00052730|Desmia Janzen07|658|1n|BOLD:ACJ2565  
 Alabagrus keithwillmotti[584]|DHJP00038808|Phostria Janzen03|658|0n|BOLD:ACJ2565  
 Alabagrus keithwillmotti[585]|DHJP00035227|spilobirolep01 biolep498|658|0n|BOLD:ACJ2565  
 Alabagrus keithwillmotti[586]|DHJP00058068|Desmia Janzen14|661|0n|BOLD:ACJ2565  
 Alabagrus keithwillmotti[587]|DHJP00038809|Asturodes fimbriauralisDHJ02|658|0n|BOLD:ACJ2565  
 Alabagrus keithwillmotti[588]|DHJP00045809|Herpetogramma Solis10|658|0n|BOLD:ACJ2565  
 Alabagrus keithwillmotti[589]|DHJP00045808|Herpetogramma Solis10|658|0n|BOLD:ACJ2565  
 Alabagrus keithwillmotti[590]|DHJP00036339|Asturodes fimbriauralisDHJ02|658|0n|BOLD:ACJ2565  
 Alabagrus keithwillmotti[591]|DHJP00045789|Herpetogramma Solis10|658|0n|BOLD:ACJ2565  
 Alabagrus keithwillmotti[592]|DHJP00039357|Desmia octomaculalis|658|0n|BOLD:ACJ2565  
 Alabagrus keithwillmotti[593]|DHJP00007207|Pilocrocis Solis20|658|0n|BOLD:ACJ2565  
 Alabagrus paulheberti[594]|DHJP00046953|Aponia minnithalis|658|0n|BOLD:ACD1800  
 Alabagrus paulheberti[595]|DHJP00046746|Aponia minnithalis|658|1n|BOLD:ACD1800  
 Alabagrus paulheberti[596]|DHJP00040223|Aponia itzalis|658|1n|BOLD:ACD1800  
 Alabagrus donharveyi[597]|DHJP00021163|Coelorthyndia pandaralis|624|0n|BOLD:ACD1739  
 Alabagrus donharveyi[598]|DHJP00036711|Coenostolopsis apicalis|625|0n|BOLD:ACD1739

Alabagrus paunbertii[590][DHJPAR0004225]Apoma itzatis[658]1n[BOLD:ACD1800  
 Alabagrus donharveyi[597][DHJPAR00021163]Coelorhynchidia pandaralis[624]0n[BOLD:ACD1739  
 Alabagrus donharveyi[598][DHJPAR00036711]Coenostolopsis apicalis[625]0n[BOLD:ACD1739  
 Alabagrus donharveyi[599][DHJPAR00021165]Coelorhynchidia pandaralis[654]0n[BOLD:ACD1739  
 Alabagrus donharveyi[600][DHJPAR00054513]Coenostolopsis apicalis[658]0n[BOLD:ACD1739  
 Alabagrus donharveyi[601][DHJPAR00048734]Coenostolopsis apicalis[658]0n[BOLD:ACD1739  
 Alabagrus donharveyi[602][DHJPAR00037930]Coenostolopsis apicalis[658]0n[BOLD:ACD1739  
 Alabagrus donharveyi[603][DHJPAR00045810]Coenostolopsis apicalis[658]0n[BOLD:ACD1739  
 Alabagrus donharveyi[604][DHJPAR00036688]Coenostolopsis apicalis[658]0n[BOLD:ACD1739  
 Alabagrus donharveyi[605][DHJPAR00054512]Coenostolopsis apicalis[658]0n[BOLD:ACD1739  
 Alabagrus bobpoolei[606][DHJPAR00042815]Eulepte Solis 15[489]5n[BOLD:ACD2038  
 Alabagrus bobpoolei[607][DHJPAR00038924]Eulepte Solis 15[658]0n[BOLD:ACD2038  
 Alabagrus bobpoolei[608][DHJPAR00048725]Eulepte Solis 15[658]1n[BOLD:ACD2038  
 Alabagrus bobpoolei[609][DHJPAR00045785]Eulepte Solis 15[658]0n[BOLD:ACD2038  
 Alabagrus bobpoolei[610][DHJPAR00054495]Eulepte Solis 15[658]0n[BOLD:ACD2038  
 Alabagrus bobpoolei[611][DHJPAR00042813]Eulepte Solis 15[658]2n[BOLD:ACD2038  
 Alabagrus bobpoolei[612][DHJPAR00042805]Eulepte Solis 15[658]1n[BOLD:ACD2038  
 Alabagrus bobpoolei[613][DHJPAR00054514]Eulepte Solis 15[658]0n[BOLD:ACD2038  
 Alabagrus bobpoolei[614][DHJPAR00051382]Eulepte Solis 15[658]1n[BOLD:ACD2038  
 Alabagrus bobpoolei[615][DHJPAR00042828]Eulepte Solis 15[658]0n[BOLD:ACD2038  
 Alabagrus bobpoolei[616][DHJPAR00042814]Eulepte Solis 15[658]0n[BOLD:ACD2038  
 Alabagrus bobpoolei[617][DHJPAR00048727]Eulepte Solis 15[658]0n[BOLD:ACD2038  
 Alabagrus bobpoolei[618][DHJPAR00037887]Eulepte Solis 15[632]1n[BOLD:ACD2038  
 Alabagrus bobpoolei[619][DHJPAR00050364]Eulepte Solis 15[658]0n[BOLD:ACD2038  
 Alabagrus bobpoolei[620][DHJPAR00041169]Eulepte Janzen12[624]2n[BOLD:ACD2038  
 Alabagrus bobpoolei[621][DHJPAR00036694]Eulepte Janzen06[633]0n[BOLD:ACD2038  
 Alabagrus bobpoolei[622][DHJPAR00051380]Eulepte Solis 15[658]0n[BOLD:ACD2038  
 Alabagrus bobpoolei[623][DHJPAR00042811]Eulepte Solis 15[658]2n[BOLD:ACD2038  
 Alabagrus jennyphillipsae[624][DHJPAR00039523]Leuochromodes melusinalisDHJ01[658]0n[BOLD:ADC...  
 Alabagrus jennyphillipsae[625][DHJPAR00035225]Leuochromodes melusinalisDHJ01[658]0n[BOLD:ADC...  
 Alabagrus jennyphillipsae[626][DHJPAR00037923]Leuochromodes melusinalisDHJ01[658]1n[BOLD:ADC...  
 Alabagrus isidrochaconi[627][DHJPAR00053608]Glyphodes sibilalisDHJ01[658]0n[BOLD:ACJ5020  
 Alabagrus isidrochaconi[628][DHJPAR00053626]Glyphodes sibilalisDHJ01[658]0n[BOLD:ACJ5020  
 Alabagrus isidrochaconi[629][DHJPAR00155200]Glyphodes sibilalisDHJ01[654]0n[BOLD:ACJ5020  
 Alabagrus isidrochaconi[630][DHJPAR00052674]Glyphodes sibilalisDHJ01[658]0n[BOLD:ACJ5020  
 Alabagrus isidrochaconi[631][DHJPAR00053609]Glyphodes sibilalisDHJ01[658]0n[BOLD:ACJ5020  
 Alabagrus isidrochaconi[632][DHJPAR00053633]Glyphodes sibilalisDHJ01[658]0n[BOLD:ACJ5020  
 Alabagrus isidrochaconi[633][DHJPAR00053630]Glyphodes sibilalisDHJ01[658]0n[BOLD:ACJ5020  
 Alabagrus isidrochaconi[634][DHJPAR0015523]Glyphodes sibilalisDHJ01[654]0n[BOLD:ACJ5020  
 Alabagrus isidrochaconi[635][DHJPAR00052683]Glyphodes sibilalisDHJ01[658]0n[BOLD:ACJ5020  
 Alabagrus isidrochaconi[636][DHJPAR00053627]Glyphodes sibilalisDHJ01[626]0n[BOLD:ACJ5020  
 Alabagrus isidrochaconi[637][DHJPAR0009405]Glyphodes sibilalisDHJ01[654]2n[BOLD:ACJ5020  
 Alabagrus isidrochaconi[638][DHJPAR0015525]Eulepte Janzen03[654]0n[BOLD:ACJ5020  
 Alabagrus isidrochaconi[639][DHJPAR00053624]Glyphodes sibilalisDHJ01[658]0n[BOLD:ACJ5020  
 Alabagrus isidrochaconi[640][DHJPAR00053631]Glyphodes sibilalisDHJ01[658]0n[BOLD:ACJ5020  
 Alabagrus isidrochaconi[641][DHJPAR00052684]Glyphodes sibilalisDHJ01[658]0n[BOLD:ACJ5020  
 Alabagrus isidrochaconi[642][DHJPAR00052676]Glyphodes sibilalisDHJ01[658]0n[BOLD:ACJ5020  
 Alabagrus isidrochaconi[643][DHJPAR00053629]Glyphodes sibilalisDHJ01[658]0n[BOLD:ACJ5020  
 Alabagrus isidrochaconi[644][DHJPAR00052675]Glyphodes sibilalisDHJ01[658]0n[BOLD:ACJ5020  
 Alabagrus isidrochaconi[645][DHJPAR00053634]Glyphodes sibilalisDHJ01[658]0n[BOLD:ACJ5020  
 Alabagrus tanyadapkeyae[646][DHJPAR00061440]Phostria cyrisalis[658]19n  
 Alabagrus tanyadapkeyae[647][DHJPAR00040225]Phostria cyrisalis[647]0n[BOLD:ACR3678  
 Alabagrus tanyadapkeyae[648][DHJPAR00055970]Phostria cyrisalis[670]0n[BOLD:ACR3678  
 Alabagrus tanyadapkeyae[649][DHJPAR00040218]Phostria cyrisalis[658]0n[BOLD:ACR3678  
 Alabagrus tanyadapkeyae[650][DHJPAR00057429]Phostria cyrisalis[658]0n[BOLD:ACR3678  
 Alabagrus jeanfrancoislandryi[651][DHJPAR00050932]Eulepte alialis421[0n]BOLD:ABA9277  
 Alabagrus jeanfrancoislandryi[652][DHJPAR00037900]Hyalorista exuvialisDHJ02[624]2n[BOLD:ABA9277  
 Alabagrus jeanfrancoislandryi[653][DHJPAR0015522]Microthyris anormalis[657]1n[BOLD:ABA9277  
 Alabagrus jeanfrancoislandryi[654][DHJPAR00041196]Eulepte alialis[622]3n[BOLD:ABA9277  
 Alabagrus jeanfrancoislandryi[655][DHJPAR00045786]Eulepte alialis[622]0n[BOLD:ABA9277  
 Alabagrus jeanfrancoislandryi[656][DHJPAR0009357]Eulepte alialis[630]4n[BOLD:ABA9277  
 Alabagrus jeanfrancoislandryi[657][DHJPAR00057431]Orphanostigma haemorrhoidalis[658]1n[BOLD:A...  
 Alabagrus jeanfrancoislandryi[658][DHJPAR00045783]Herpetogramma Solis11[658]0n[BOLD:ABA9277  
 Alabagrus jeanfrancoislandryi[659][DHJPAR00057745]Eulepte alialis[647]0n[BOLD:ABA9277  
 Alabagrus jeanfrancoislandryi[660][DHJPAR0009406]Conchylodes arcifera[624]0n[BOLD:ABA9277  
 Alabagrus jeanfrancoislandryi[661][DHJPAR00041603]Herpetogramma Solis11[628]1n[BOLD:ABA9277  
 Alabagrus jeanfrancoislandryi[662][DHJPAR00036703]Eulepte alialis[637]0n[BOLD:ABA9277  
 Alabagrus jeanfrancoislandryi[663][DHJPAR00057430]Herpetogramma salbialis[622]0n[BOLD:ABA9277  
 Alabagrus jeanfrancoislandryi[664][DHJPAR0009353]Eulepte alialis[627]0n[BOLD:ABA9277  
 Alabagrus jeanfrancoislandryi[665][DHJPAR00037187]Eulepte alialis[654]0n[BOLD:ABA9277  
 Alabagrus jeanfrancoislandryi[666][DHJPAR00056298]Eulepte alialis[658]0n[BOLD:ABA9277  
 Alabagrus jeanfrancoislandryi[667][DHJPAR00037950]Eulepte alialis[658]0n[BOLD:ABA9277  
 Alabagrus jeanfrancoislandryi[668][DHJPAR00045011]Herpetogramma salbialis[658]0n[BOLD:ABA9277  
 Alabagrus jeanfrancoislandryi[669][DHJPAR00050370]Patania Solis03[658]0n[BOLD:ABA9277  
 Alabagrus jeanfrancoislandryi[670][DHJPAR00045014]Herpetogramma salbialis[658]0n[BOLD:ABA9277  
 Alabagrus jeanfrancoislandryi[671][DHJPAR00036356]Ategumia lotanalisDHJ09[658]1n[BOLD:ABA9277  
 Alabagrus jeanfrancoislandryi[672][DHJPAR0015387]Ategumia lotanalisDHJ07[642]3n[BOLD:ABA9277  
 Alabagrus jeanfrancoislandryi[673][DHJPAR00056296]Eulepte alialis[657]0n[BOLD:ABA9277  
 Alabagrus jeanfrancoislandryi[674][DHJPAR00037953]Orphanostigma haemorrhoidalis[658]0n[BOLD:A...  
 Alabagrus jeanfrancoislandryi[675][DHJPAR00037956]Eulepte alialis[658]0n[BOLD:ABA9277  
 Alabagrus jeanfrancoislandryi[676][DHJPAR00036685]Eulepte alialis[626]0n[BOLD:ABA9277  
 Alabagrus jeanfrancoislandryi[677][DHJPAR0009373]Eulepte alialis[654]1n[BOLD:ABA9277  
 Alabagrus jeanfrancoislandryi[678][DHJPAR00057738]Eulepte alialis[658]4n[BOLD:ABA9277  
 Alabagrus jeanfrancoislandryi[679][DHJPAR00037917]Eulepte alialis[658]0n[BOLD:ABA9277  
 Alabagrus jeanfrancoislandryi[680][DHJPAR00037948]Eulepte alialis[658]0n[BOLD:ABA9277  
 Alabagrus jeanfrancoislandryi[681][DHJPAR00053613]Orphanostigma haemorrhoidalis[658]0n[BOLD:A...  
 Alabagrus jeanfrancoislandryi[682][DHJPAR00036700]Phostria samealis[606]0n[BOLD:ABA9277  
 Alabagrus jeanfrancoislandryi[683][DHJPAR00056994]Herpetogramma salbialis[658]0n[BOLD:ABA9277  
 Alabagrus jeanfrancoislandryi[684][DHJPAR00056999]Herpetogramma salbialis[658]0n[BOLD:ABA9277  
 Alabagrus jeanfrancoislandryi[685][DHJPAR00030388]Ategumia lotanalis[621]3n[BOLD:ABA9277  
 Alabagrus jeanfrancoislandryi[686][DHJPAR00042824]Herpetogramma salbialis[418]0n[BOLD:ABA9277  
 Alabagrus jeanfrancoislandryi[687][DHJPAR00045015]Herpetogramma salbialis[621]3n[BOLD:ABA9277  
 Alabagrus jeanfrancoislandryi[688][DHJPAR00049939]Eulepte alialis[658]10n  
 Alabagrus jeanfrancoislandryi[689][DHJPAR00050065]Eulepte alialis[658]3n[BOLD:ABA9277  
 Alabagrus jeanfrancoislandryi[690][DHJPAR00036374]Eulepte alialis[558]0n[BOLD:ABA9277  
 Alabagrus jeanfrancoislandryi[691][DHJPAR00045004]Herpetogramma salbialis[656]4n[BOLD:ABA9277  
 Alabagrus jeanfrancoislandryi[692][DHJPAR00052689]Eulepte alialis[658]0n[BOLD:ABA9277  
 Alabagrus jeanfrancoislandryi[693][DHJPAR00045010]Herpetogramma salbialis[658]3n[BOLD:ABA9277  
 Alabagrus jeanfrancoislandryi[694][DHJPAR00045012]Herpetogramma salbialis[597]1n[BOLD:ABA9277  
 Alabagrus jeanfrancoislandryi[695][DHJPAR00045000]Eulepte alialis[658]1n[BOLD:ABA9277  
 Alabagrus jeanfrancoislandryi[696][DHJPAR00052693]Eulepte alialis[359]4n  
 Alabagrus jeanfrancoislandryi[697][DHJPAR00045006]Herpetogramma phaeopteralis[658]0n[BOLD:ABA...  
 Alabagrus lindapitkinae[698][DHJPAR00052082]Omiodes Janzen05[659]0n[BOLD:ACJ2111



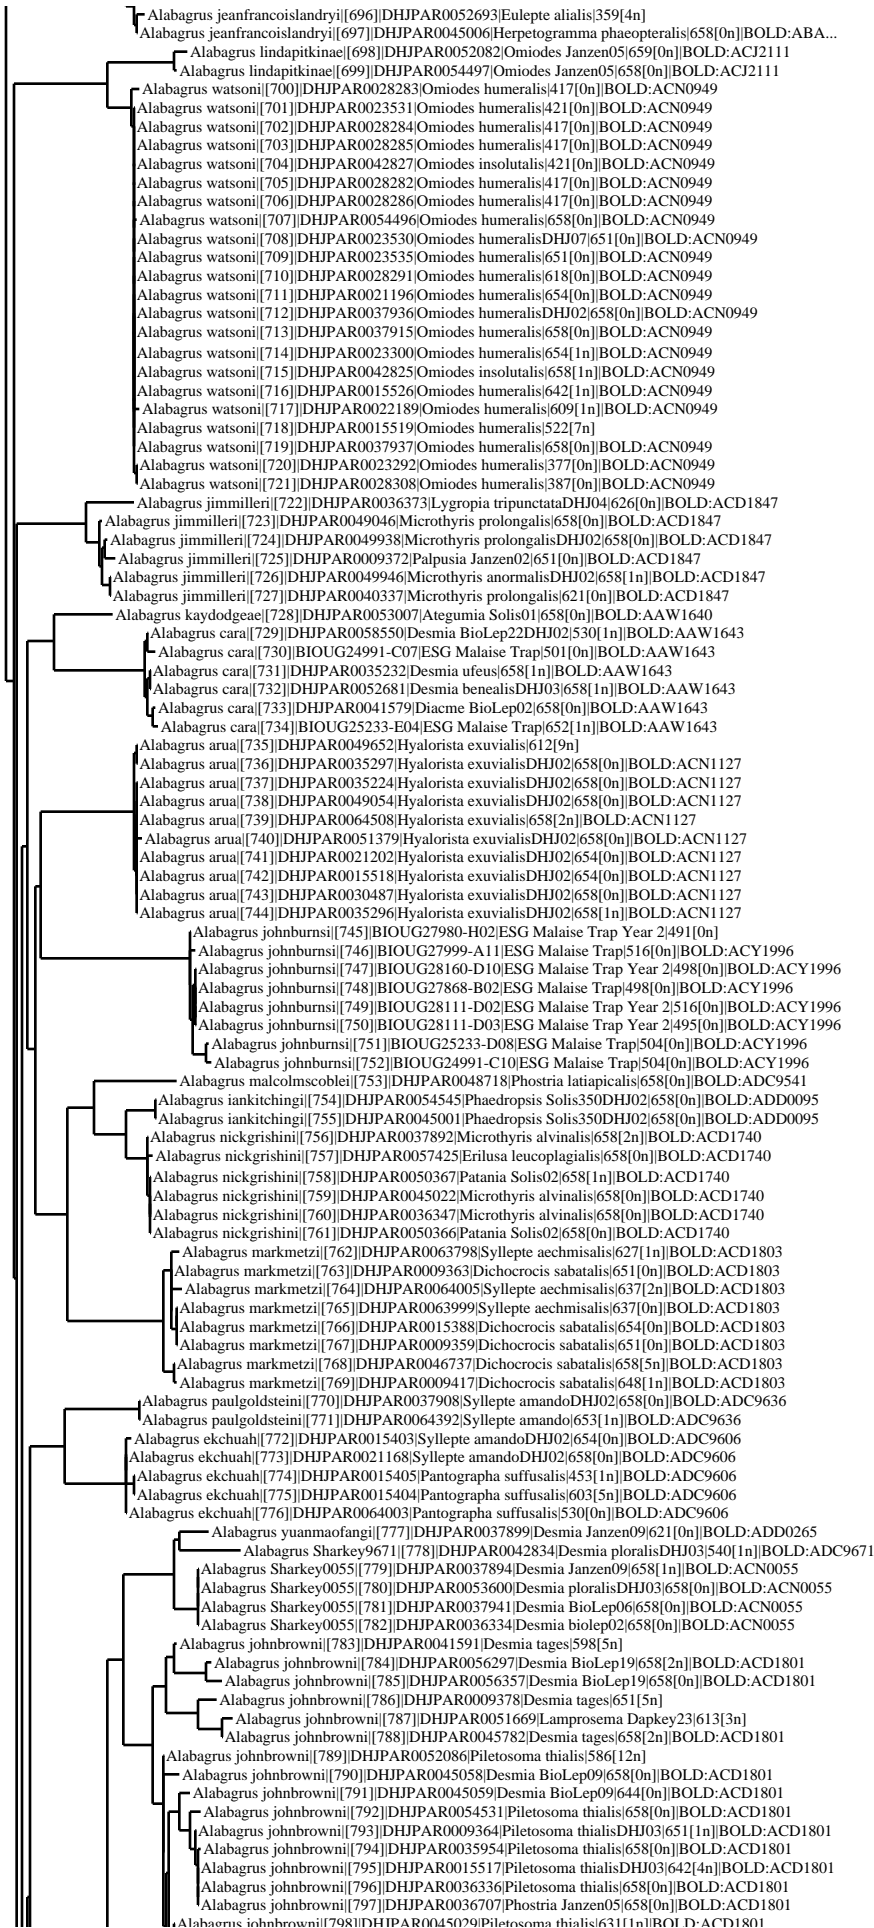

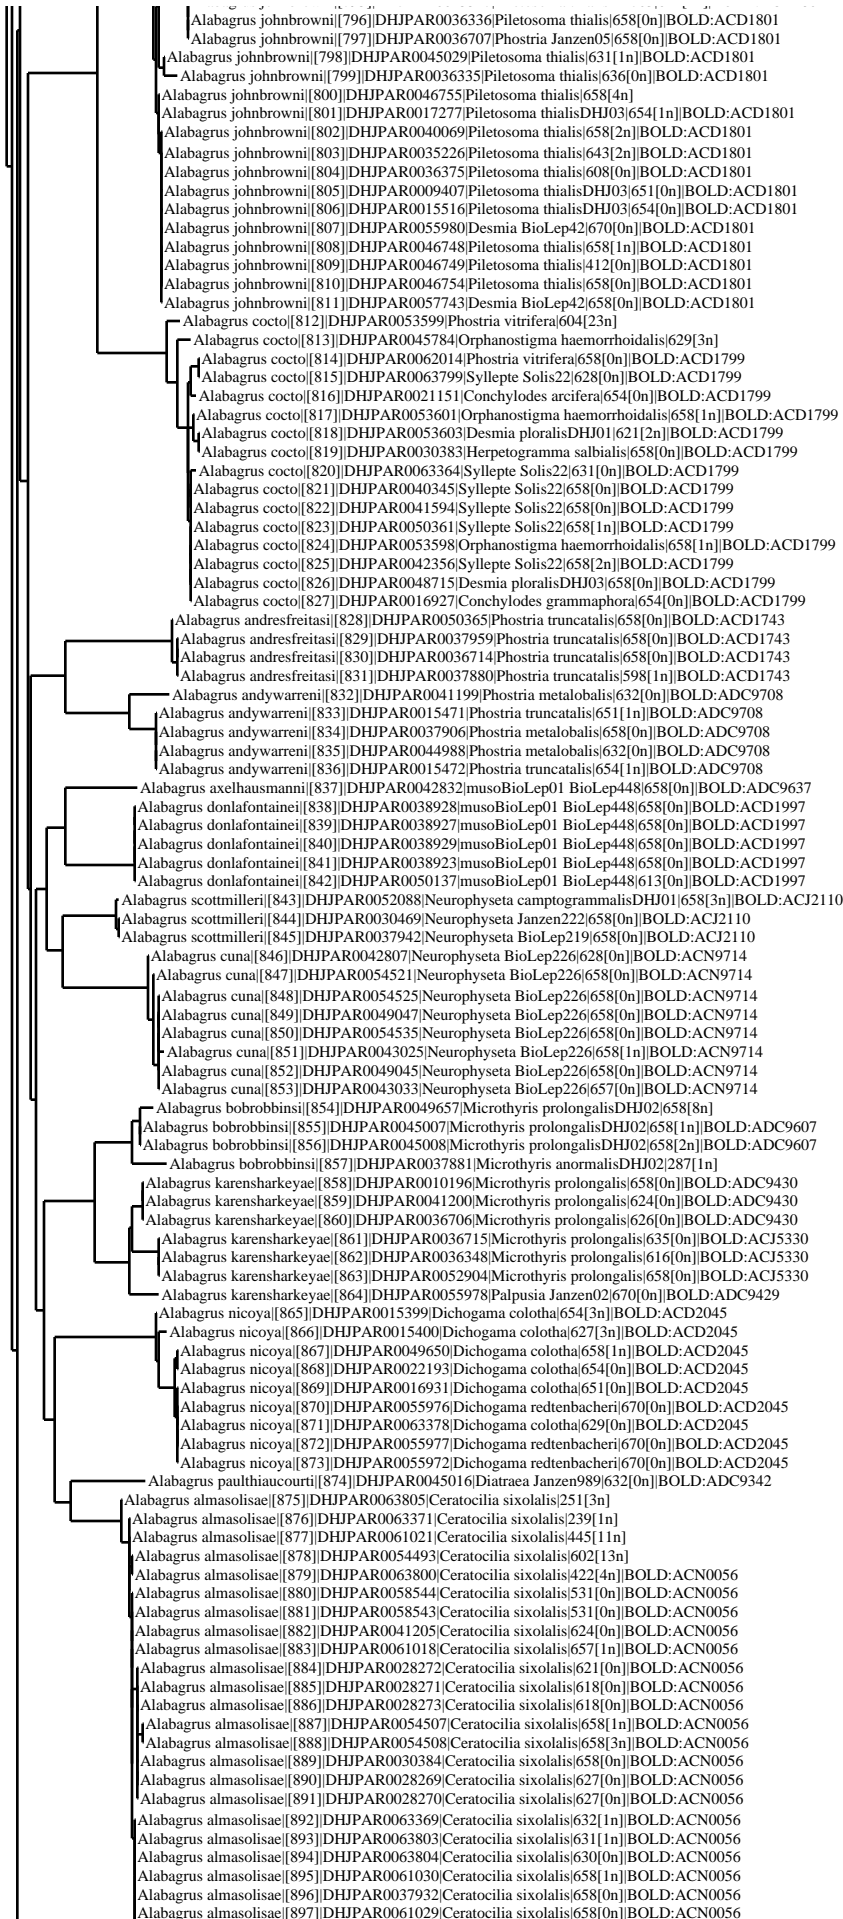

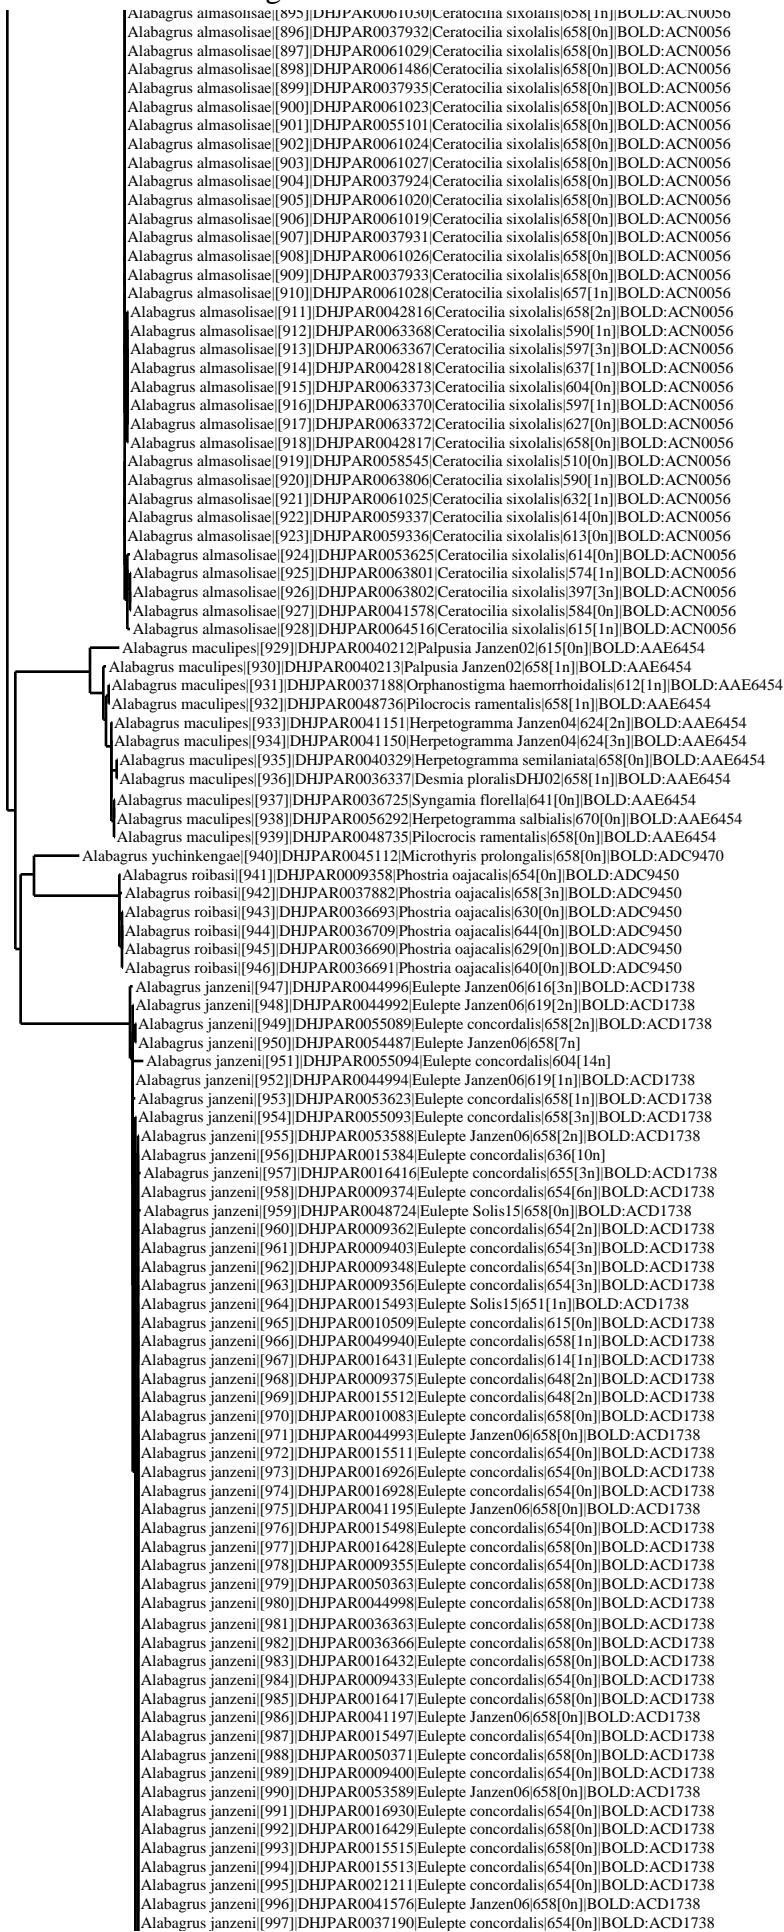

Alabagrus janzeni[995]DHJP0021211[Eulepte concordalis]654[0n]BOLD:ACD1738  
 Alabagrus janzeni[996]DHJP0041576[Eulepte Janzen06]658[0n]BOLD:ACD1738  
 Alabagrus janzeni[997]DHJP0037190[Eulepte concordalis]654[0n]BOLD:ACD1738  
 Alabagrus janzeni[998]DHJP0036699[Eulepte concordalis]635[0n]BOLD:ACD1738  
 Alabagrus janzeni[999]DHJP0015495[Eulepte Solis15]639[5n]BOLD:ACD1738  
 Alabagrus janzeni[1000]DHJP0009434[Eulepte concordalis]654[1n]BOLD:ACD1738  
 Alabagrus janzeni[1001]DHJP0036365[Eulepte concordalis]611[0n]BOLD:ACD1738  
 Alabagrus janzeni[1002]DHJP0009354[Eulepte concordalis]654[5n]BOLD:ACD1738  
 Alabagrus janzeni[1003]DHJP0015496[Eulepte concordalis]645[0n]BOLD:ACD1738  
 Alabagrus janzeni[1004]DHJP0036697[Eulepte concordalis]641[0n]BOLD:ACD1738  
 Alabagrus janzeni[1005]DHJP0058539[Eulepte concordalis]530[0n]BOLD:ACD1738  
 Alabagrus janzeni[1006]DHJP0058542[Eulepte concordalis]530[0n]BOLD:ACD1738  
 Alabagrus janzeni[1007]DHJP0010510[Eulepte concordalis]658[0n]BOLD:ACD1738  
 Alabagrus janzeni[1008]DHJP0058537[Eulepte concordalis]530[0n]BOLD:ACD1738  
 Alabagrus janzeni[1009]DHJP0036712[Eulepte concordalis]635[0n]BOLD:ACD1738  
 Alabagrus janzeni[1010]DHJP0016430[Eulepte concordalis]623[0n]BOLD:ACD1738  
 Alabagrus janzeni[1011]DHJP0041198[Eulepte Janzen06]585[0n]BOLD:ACD1738  
 Alabagrus janzeni[1012]DHJP0063366[Eulepte concordalis]570[0n]BOLD:ACD1738  
 Alabagrus janzeni[1013]DHJP0041167[Eulepte Janzen02]539[0n]BOLD:ACD1738  
 Alabagrus janzeni[1014]DHJP0015494[Eulepte Solis15]534[3n]BOLD:ACD1738  
 Alabagrus janzeni[1015]DHJP0036698[Eulepte concordalis]374[0n]BOLD:ACD1738  
 Alabagrus janzeni[1016]DHJP0041166[Eulepte Janzen06]284[1n]  
 Alabagrus janzeni[1017]DHJP0036718[Eulepte concordalis]446[1n]BOLD:ACD1738  
 Alabagrus janzeni[1018]DHJP0029179[Eulepte concordalis]362[1n]BOLD:ACD1738  
 Alabagrus janzeni[1019]DHJP0036716[Eulepte concordalis]383[1n]BOLD:ACD1738  
 Alabagrus janzeni[1020]DHJP0015499[Eulepte concordalis]615[0n]BOLD:ACD1738  
 Alabagrus janzeni[1021]DHJP0009376[Eulepte concordalis]609[1n]BOLD:ACD1738  
 Alabagrus janzeni[1022]DHJP0044995[Eulepte Janzen06]658[0n]BOLD:ACD1738  
 Alabagrus janzeni[1023]DHJP0055092[Eulepte concordalis]658[1n]BOLD:ACD1738  
 Alabagrus janzeni[1024]DHJP0053622[Eulepte Janzen06]604[7n]  
 Alabagrus janzeni[1025]DHJP0055095[Eulepte concordalis]629[2n]BOLD:ACD1738  
 Alabagrus janzeni[1026]DHJP0037922[Eulepte concordalis]658[0n]BOLD:ACD1738  
 Alabagrus janzeni[1027]DHJP0037902[Eulepte concordalis]658[2n]BOLD:ACD1738  
 Alabagrus janzeni[1028]DHJP0055097[Eulepte concordalis]658[2n]BOLD:ACD1738  
 Alabagrus janzeni[1029]DHJP0044997[Eulepte Janzen06]658[1n]BOLD:ACD1738  
 Alabagrus janzeni[1030]DHJP0055091[Eulepte concordalis]658[0n]BOLD:ACD1738  
 Alabagrus janzeni[1031]DHJP0053587[Eulepte concordalis]658[3n]BOLD:ACD1738  
 Alabagrus janzeni[1032]DHJP0021208[Eulepte concordalis]639[0n]BOLD:ACD1738  
 Alabagrus janzeni[1033]DHJP0021149[Eulepte concordalis]654[0n]BOLD:ACD1738  
 Alabagrus janzeni[1034]DHJP0052083[Eulepte concordalis]611[7n]  
 Alabagrus janzeni[1035]DHJP0055090[Eulepte concordalis]604[8n]  
 Alabagrus janzeni[1036]DHJP0053590[Eulepte Janzen06]658[5n]BOLD:ACD1738  
 Alabagrus janzeni[1037]DHJP0055096[Eulepte concordalis]658[3n]BOLD:ACD1738  
 Hemichoma frankhovorei[1038]DHJP0028266[Halsysidota pectenella]618[0n]BOLD:AEF1239  
 Plesiocoelus vanachterbergii[1039]DHJP0051104[Brenthia Janzen05]527[3n]BOLD:ABX6701  
 Plesiocoelus vanachterbergii[1040]DHJP0045360[Brenthia Janzen14]658[6n]  
 Plesiocoelus vanachterbergii[1041]DHJP0048215[Brenthia Janzen15]658[3n]BOLD:ABX6701  
 Plesiocoelus vanachterbergii[1042]DHJP0053040[Brenthia Janzen02]658[0n]BOLD:ABX6701  
 Plesiocoelus vanachterbergii[1043]DHJP0053045[Brenthia Janzen02]658[0n]BOLD:ABX6701  
 Plesiocoelus vanachterbergii[1044]DHJP0053044[Brenthia Janzen02]658[0n]BOLD:ABX6701  
 Plesiocoelus vanachterbergii[1045]DHJP0053033[Brenthia Janzen02]658[5n]  
 Plesiocoelus vanachterbergii[1046]DHJP0050114[Brenthia Janzen14]658[5n]  
 Plesiocoelus vanachterbergii[1047]DHJP0053046[Brenthia Janzen02]647[1n]BOLD:ABX6701  
 Plesiocoelus vanachterbergii[1048]DHJP0049867[Brenthia Janzen15]658[4n]BOLD:ABX6701  
 Aerophilus sandraberrisae[1049]DHJP0052688[Deuterollyta oediperalis]658[0n]BOLD:ACJ1459  
 Aerophilus sandraberrisae[1050]DHJP0049659[Deuterollyta basalata]613[6n]  
 Aerophilus sandraberrisae[1051]DHJP0021148[Deuterollyta oediperalis]390[0n]  
 Aerophilus sandraberrisae[1052]DHJP0040219[Deuterollyta oediperalis]275[1n]  
 Aerophilus sandraberrisae[1053]DHJP0040220[Deuterollyta oediperalis]622[3n]BOLD:ACJ1459  
 Lytopylus okchunae[1054]DHJP0056977[Antaeotricha Janzen78]658[0n]BOLD:ACC1822  
 Lytopylus okchunae[1055]DHJP0051910[Antaeotricha Janzen78]658[0n]BOLD:ACC1822  
 Lytopylus okchunae[1056]DHJP0051363[Antaeotricha Janzen72]658[0n]BOLD:ACC1822  
 Lytopylus okchunae[1057]DHJP0037191[Antaeotricha Janzen78]654[0n]BOLD:ACC1822  
 Lytopylus okchunae[1058]BIOUG25661-C04[ESG Malaise Trap]600[0n]BOLD:ACC1822  
 Lytopylus okchunae[1059]BIOUG25661-A07[ESG Malaise Trap]594[0n]BOLD:ACC1822  
 Lytopylus okchunae[1060]BIOUG28100-G03[ESG Malaise Trap Year 2]576[0n]BOLD:ACC1822  
 Lytopylus okchunae[1061]DHJP0056981[Antaeotricha Janzen78]658[0n]BOLD:ACC1822  
 Lytopylus okchunae[1062]DHJP0050369[Antaeotricha Janzen224]658[0n]BOLD:ACC1822  
 Lytopylus okchunae[1063]DHJP0056980[Antaeotricha Janzen78]658[0n]BOLD:ACC1822  
 Lytopylus okchunae[1064]DHJP0041164[Antaeotricha Janzen78]624[0n]BOLD:ACC1822  
 Lytopylus okchunae[1065]DHJP0055819[Antaeotricha Janzen72]658[0n]BOLD:ACC1822  
 Lytopylus okchunae[1066]DHJP0050939[Antaeotricha Janzen78]658[0n]BOLD:ACC1822  
 Lytopylus okchunae[1067]DHJP0056982[Antaeotricha Janzen78]658[0n]BOLD:ACC1822  
 Lytopylus okchunae[1068]DHJP0055345[Antaeotricha Janzen72]658[0n]BOLD:ACC1822  
 Lytopylus okchunae[1069]DHJP0055984[Antaeotricha Janzen72]670[0n]BOLD:ACC1822  
 Lytopylus okchunae[1070]BIOUG28198-C07[ESG Malaise Trap Year 2]658[1n]BOLD:ACC1822  
 Lytopylus okchunae[1071]DHJP0055355[Antaeotricha Janzen72]658[0n]BOLD:ACC1822  
 Lytopylus okchunae[1072]DHJP0057424[Antaeotricha Janzen78]658[0n]BOLD:ACC1822  
 Lytopylus okchunae[1073]DHJP0015529[Antaeotricha Janzen78]654[0n]BOLD:ACC1822  
 Lytopylus gustavoindunii[1074]DHJP0053646[Stenoma Janzen284]486[3n]BOLD:ACJ2804  
 Lytopylus gustavoindunii[1075]DHJP0051090[Stenoma Janzen142]658[4n]BOLD:ACJ2804  
 Lytopylus gustavoindunii[1076]DHJP0053857[Stenoma Janzen284]661[0n]BOLD:ACJ2804  
 Lytopylus gustavoindunii[1077]DHJP0051359[Stenoma Janzen142]658[1n]BOLD:ACJ2804  
 Lytopylus gustavoindunii[1078]DHJP0056821[Stenoma Janzen142]658[0n]BOLD:ACJ2804  
 Lytopylus gustavoindunii[1079]DHJP0041560[Stenoma Janzen142]658[0n]BOLD:ACJ2804  
 Lytopylus gustavoindunii[1080]BIOUG27761-A10[ESG Malaise Trap Year 2]543[0n]BOLD:ACJ2804  
 Lytopylus gustavoindunii[1081]DHJP0051093[Stenoma Janzen142]658[0n]BOLD:ACJ2804  
 Lytopylus gustavoindunii[1082]DHJP0056431[Stenoma Janzen142]658[0n]BOLD:ACJ2804  
 Lytopylus gustavoindunii[1083]DHJP0053653[Stenoma Janzen284]658[0n]BOLD:ACJ2804  
 Lytopylus gustavoindunii[1084]DHJP0051372[Stenoma Janzen142]658[0n]BOLD:ACJ2804  
 Lytopylus gustavoindunii[1085]DHJP0051369[Stenoma Janzen142]658[0n]BOLD:ACJ2804  
 Lytopylus alfredomainieri[1086]DHJP0038251[Olethreutes Brown22]658[0n]BOLD:ADD0100  
 Lytopylus alfredomainieri[1087]DHJP0035519[Olethreutes Janzen188]658[0n]BOLD:ADD0100  
 Lytopylus alfredomainieri[1088]DHJP0035513[Olethreutes Janzen188]658[0n]BOLD:ADD0100  
 Lytopylus alfredomainieri[1089]DHJP0037861[Olethreutes Brown22]658[0n]BOLD:ADD0100  
 Lytopylus alfredomainieri[1090]DHJP0035525[Olethreutes Janzen188]658[0n]BOLD:ADD0100  
 Lytopylus chrysockeras[1091]DHJP0055986[Janzen01 Janzen179]670[0n]BOLD:AAJ9259  
 Lytopylus chrysockeras[1092]DHJP0049276[Janzen01 Janzen356]658[0n]BOLD:AAJ9259  
 Lytopylus chrysockeras[1093]DHJP0052673[Janzen01 Janzen19]658[0n]BOLD:AAJ9259  
 Lytopylus chrysockeras[1094]DHJP0040503[Janzen01 Janzen485]658[0n]BOLD:AAJ9259  
 Lytopylus chrysockeras[1095]DHJP0040067[Dichomeris Janzen703]658[0n]BOLD:AAJ9259  
 Lytopylus chrysockeras[1096]DHJP0040487[Janzen01 Janzen485]658[0n]BOLD:AAJ9259  
 Lytopylus chrysockeras[1097]DHJP0055507[Janzen01 Janzen485]658[0n]BOLD:AAJ9259

Lytopylus chrysockeras[1095]DHJP0040067Dichomeris Janzen703658[0n]BOLD:AAJ9259  
Lytopylus chrysockeras[1096]DHJP0040487gelJanzen01 Janzen485658[0n]BOLD:AAJ9259  
Lytopylus chrysockeras[1097]DHJP00055507gelJanzen01 Janzen485658[0n]BOLD:AAJ9259  
Lytopylus chrysockeras[1098]DHJP00055353gelJanzen01 Janzen485658[0n]BOLD:AAJ9259  
Lytopylus chrysockeras[1099]DHJP00051364gelJanzen01 Janzen356658[0n]BOLD:AAJ9259  
Lytopylus chrysockeras[1100]DHJP00051817gelJanzen01 Janzen485661[0n]BOLD:AAJ9259  
Lytopylus chrysockeras[1101]DHJP00055513gelJanzen01 Janzen485658[0n]BOLD:AAJ9259  
Lytopylus chrysockeras[1102]DHJP00055228gelJanzen01 Janzen485658[0n]BOLD:AAJ9259  
Lytopylus chrysockeras[1103]DHJP00040473gelJanzen01 Janzen485658[0n]BOLD:AAJ9259  
Lytopylus chrysockeras[1104]DHJP00040492gelJanzen01 Janzen485658[0n]BOLD:AAJ9259  
Lytopylus chrysockeras[1105]DHJP00038356gelJanzen01 Janzen1485658[0n]BOLD:AAJ9259  
Lytopylus chrysockeras[1106]DHJP00040476gelJanzen01 Janzen485658[0n]BOLD:AAJ9259  
Lytopylus chrysockeras[1107]DHJP00015527gelJanzen01 Janzen781654[0n]BOLD:AAJ9259  
Lytopylus chrysockeras[1108]DHJP00055490gelJanzen01 Janzen485658[0n]BOLD:AAJ9259  
Lytopylus chrysockeras[1109]DHJP00055543gelJanzen01 Janzen485661[0n]BOLD:AAJ9259  
Lytopylus chrysockeras[1110]DHJP00055504gelJanzen01 Janzen485658[0n]BOLD:AAJ9259  
Lytopylus chrysockeras[1111]DHJP00040070gelJanzen01 Janzen356658[0n]BOLD:AAJ9259  
Lytopylus chrysockeras[1112]DHJP00040331gelJanzen01 Janzen485658[0n]BOLD:AAJ9259  
Lytopylus chrysockeras[1113]DHJP00040485gelJanzen01 Janzen485658[0n]BOLD:AAJ9259  
Lytopylus chrysockeras[1114]DHJP00064107gelJanzen01 Janzen485658[0n]BOLD:AAJ9259  
Lytopylus chrysockeras[1115]DHJP00049359gelJanzen01 Janzen485658[0n]BOLD:AAJ9259  
Lytopylus chrysockeras[1116]DHJP00040065gelJanzen01 Janzen485658[0n]BOLD:AAJ9259  
Lytopylus chrysockeras[1117]DHJP00057739gelJanzen01 Janzen356657[0n]BOLD:AAJ9259  
Lytopylus chrysockeras[1118]DHJP00049388gelJanzen01 Janzen485639[0n]BOLD:AAJ9259  
Lytopylus chrysockeras[1119]DHJP00051162gelJanzen01 Janzen356603[0n]BOLD:AAJ9259  
Lytopylus chrysockeras[1120]DHJP00040344gelJanzen01 Janzen485658[0n]BOLD:AAJ9259  
Lytopylus chrysockeras[1121]DHJP00055527gelJanzen01 Janzen485658[0n]BOLD:AAJ9259  
Lytopylus chrysockeras[1122]DHJP00055505gelJanzen01 Janzen485658[0n]BOLD:AAJ9259  
Lytopylus chrysockeras[1123]DHJP00055522gelJanzen01 Janzen485658[0n]BOLD:AAJ9259  
Lytopylus chrysockeras[1124]DHJP00040335gelJanzen01 Janzen485658[0n]BOLD:AAJ9259  
Lytopylus chrysockeras[1125]DHJP00042837Dichomeris Janzen512658[0n]BOLD:AAJ9259  
Lytopylus chrysockeras[1126]DHJP00043002Dichomeris Janzen512658[0n]BOLD:AAJ9259  
Lytopylus chrysockeras[1127]DHJP00040505gelJanzen01 Janzen356658[0n]BOLD:AAJ9259  
Lytopylus chrysockeras[1128]DHJP00039071gelJanzen01 Janzen485634[0n]BOLD:AAJ9259  
Lytopylus chrysockeras[1129]DHJP00042835Dichomeris Janzen512658[0n]BOLD:AAJ9259  
Lytopylus chrysockeras[1130]DHJP00055352gelJanzen01 Janzen179658[0n]BOLD:AAJ9259  
Lytopylus chrysockeras[1131]DHJP00040460gelJanzen01 Janzen356658[0n]BOLD:AAJ9259  
Lytopylus chrysockeras[1132]DHJP00051373gelJanzen01 Janzen356658[0n]BOLD:AAJ9259  
Lytopylus sarahmerioetoea[1133]DHJP00056992Cercnوتا Janzen82658[1n]BOLD:ACZ0985  
Lytopylus miguelviquezi[1134]DHJP00041574gelJanzen01 Janzen485658[0n]BOLD:ABX5568  
Lytopylus miguelviquezi[1135]DHJP00041567gelJanzen01 Janzen485658[0n]BOLD:ABX5568  
Lytopylus miguelviquezi[1136]DHJP00040326Dichomeris designatellaDHJ02658[0n]BOLD:ABX5568  
Lytopylus miguelviquezi[1137]DHJP00041565gelJanzen01 Janzen485658[2n]BOLD:ABX5568  
Lytopylus miguelviquezi[1138]DHJP00041561Dichomeris designatellaDHJ02658[0n]BOLD:ABX5568  
Lytopylus miguelviquezi[1139]DHJP00041566gelJanzen01 Janzen485658[0n]BOLD:ABX5568  
Lytopylus miguelviquezi[1140]DHJP00041570gelJanzen01 Janzen485633[0n]BOLD:ABX5568  
Lytopylus miguelviquezi[1141]DHJP00055562gelJanzen01 Janzen179661[0n]BOLD:ABX5568  
Lytopylus miguelviquezi[1142]DHJP00038918Dichomeris designatellaDHJ02658[0n]BOLD:ABX5568  
Lytopylus miguelviquezi[1143]DHJP00038917Dichomeris designatellaDHJ01658[0n]BOLD:ABX5568  
Lytopylus miguelviquezi[1144]DHJP00055506gelJanzen01 Janzen179658[0n]BOLD:ABX5568  
Lytopylus miguelviquezi[1145]DHJP00041553gelJanzen01 Janzen485658[0n]BOLD:ABX5568  
Lytopylus miguelviquezi[1146]DHJP00041575Dichomeris designatellaDHJ02658[0n]BOLD:ABX5568  
Lytopylus miguelviquezi[1147]DHJP00041555gelJanzen01 Janzen485658[0n]BOLD:ABX5568  
Lytopylus miguelviquezi[1148]DHJP00041589Dichomeris designatellaDHJ02658[0n]BOLD:ABX5568  
Lytopylus miguelviquezi[1149]DHJP00040502gelJanzen01 Janzen485658[0n]BOLD:ABX5568  
Lytopylus miguelviquezi[1150]DHJP00040340Dichomeris designatellaDHJ02658[0n]BOLD:ABX5568  
Lytopylus miguelviquezi[1151]DHJP00040327Dichomeris designatellaDHJ02627[0n]BOLD:ABX5568  
Lytopylus miguelviquezi[1152]DHJP00040336gelJanzen01 Janzen485658[0n]BOLD:ABX5568  
Lytopylus miguelviquezi[1153]DHJP00041563gelJanzen01 Janzen485658[0n]BOLD:ABX5568  
Lytopylus miguelviquezi[1154]DHJP00056065gelJanzen01 Janzen179610[0n]BOLD:ABX5568  
Lytopylus miguelviquezi[1155]DHJP00038912Dichomeris designatellaDHJ02658[0n]BOLD:ABX5568  
Lytopylus miguelviquezi[1156]DHJP00040342Dichomeris designatellaDHJ03658[0n]BOLD:ABX5568  
Lytopylus miguelviquezi[1157]DHJP00040348Dichomeris designatellaDHJ03658[0n]BOLD:ABX5568  
Lytopylus miguelviquezi[1158]DHJP00040483Dichomeris designatellaDHJ03658[0n]BOLD:ABX5568  
Lytopylus miguelviquezi[1159]DHJP00041588Dichomeris designatellaDHJ03658[0n]BOLD:ABX5568  
Lytopylus miguelviquezi[1160]DHJP00038906Dichomeris designatellaDHJ02658[0n]BOLD:ABX5568  
Lytopylus miguelviquezi[1161]DHJP00041949Dichomeris designatellaDHJ02658[0n]BOLD:ABX5568  
Lytopylus miguelviquezi[1162]DHJP00040330Dichomeris designatellaDHJ03658[0n]BOLD:ABX5568  
Lytopylus miguelviquezi[1163]DHJP00045369gelJanzen01 Janzen179658[0n]BOLD:ABX5568  
Lytopylus miguelviquezi[1164]DHJP00045276gelJanzen01 Janzen179658[1n]BOLD:ABX5568  
Lytopylus miguelviquezi[1165]DHJP00045371gelJanzen01 Janzen179658[1n]BOLD:ABX5568  
Lytopylus miguelviquezi[1166]DHJP00055484gelJanzen01 Janzen485658[0n]BOLD:ABX5568  
Lytopylus miguelviquezi[1167]DHJP00062682gelJanzen01 Janzen179607[0n]BOLD:ABX5568  
Lytopylus miguelviquezi[1168]DHJP00045373gelJanzen01 Janzen179658[1n]BOLD:ABX5568  
Lytopylus miguelviquezi[1169]DHJP00045296gelJanzen01 Janzen179658[2n]BOLD:ABX5568  
Lytopylus miguelviquezi[1170]DHJP00045368gelJanzen01 Janzen179658[2n]BOLD:ABX5568  
Lytopylus miguelviquezi[1171]DHJP00045305gelJanzen01 Janzen179658[3n]BOLD:ABX5568  
Lytopylus miguelviquezi[1172]DHJP00040347Dichomeris designatellaDHJ02658[0n]BOLD:ABX5568  
Lytopylus miguelviquezi[1173]DHJP00015528gelJanzen01 Janzen485654[0n]BOLD:ABX5568  
Lytopylus miguelviquezi[1174]DHJP00038916Dichomeris designatellaDHJ02658[0n]BOLD:ABX5568  
Lytopylus miguelviquezi[1175]DHJP00045374gelJanzen01 Janzen179658[0n]BOLD:ABX5568  
Lytopylus miguelviquezi[1176]DHJP00039509gelJanzen01 Janzen485658[0n]BOLD:ABX5568  
Lytopylus miguelviquezi[1177]DHJP00040341Dichomeris designatellaDHJ02658[0n]BOLD:ABX5568  
Lytopylus miguelviquezi[1178]DHJP00039516gelJanzen01 Janzen485658[0n]BOLD:ABX5568  
Lytopylus miguelviquezi[1179]DHJP00038909gelJanzen01 Janzen485658[0n]BOLD:ABX5568  
Lytopylus miguelviquezi[1180]DHJP00038911Dichomeris designatellaDHJ02658[0n]BOLD:ABX5568  
Lytopylus miguelviquezi[1181]DHJP00042843Dichomeris designatellaDHJ02658[0n]BOLD:ABX5568  
Lytopylus miguelviquezi[1182]DHJP00041592Dichomeris designatellaDHJ02658[0n]BOLD:ABX5568  
Lytopylus miguelviquezi[1183]DHJP00041597Dichomeris designatellaDHJ02658[0n]BOLD:ABX5568  
Lytopylus miguelviquezi[1184]DHJP00040459Dichomeris designatellaDHJ03658[0n]BOLD:ABX5568  
Lytopylus miguelviquezi[1185]DHJP00040474Dichomeris designatellaDHJ03645[0n]BOLD:ABX5568  
Lytopylus miguelviquezi[1186]DHJP00039508gelJanzen01 Janzen485658[1n]BOLD:ABX5568  
Lytopylus miguelviquezi[1187]DHJP00043147Dichomeris designatellaDHJ03643[0n]BOLD:ABX5568  
Lytopylus miguelviquezi[1188]DHJP00038920Dichomeris designatellaDHJ02658[0n]BOLD:ABX5568  
Lytopylus miguelviquezi[1189]DHJP00037860Dichomeris designatellaDHJ02630[0n]BOLD:ABX5568  
Lytopylus miguelviquezi[1190]DHJP00040332Dichomeris designatellaDHJ02658[0n]BOLD:ABX5568  
Lytopylus miguelviquezi[1191]DHJP00042842gelJanzen01 Janzen179658[0n]BOLD:ABX5568  
Lytopylus miguelviquezi[1192]DHJP00045372gelJanzen01 Janzen179658[0n]BOLD:ABX5568  
Lytopylus youngcheae[1193]DHJP00054499Cercnوتا Janzen140658[0n]BOLD:ACI8518  
Lytopylus youngcheae[1194]DHJP00021132Cercnوتا Janzen140654[0n]BOLD:ACI8518  
Lytopylus youngcheae[1195]DHJP00052197Antaotricha Janzen134658[0n]BOLD:ACI8518  
Lytopylus youngcheae[1196]DHJP00041586Antaotricha Janzen134658[0n]BOLD:ACI8518

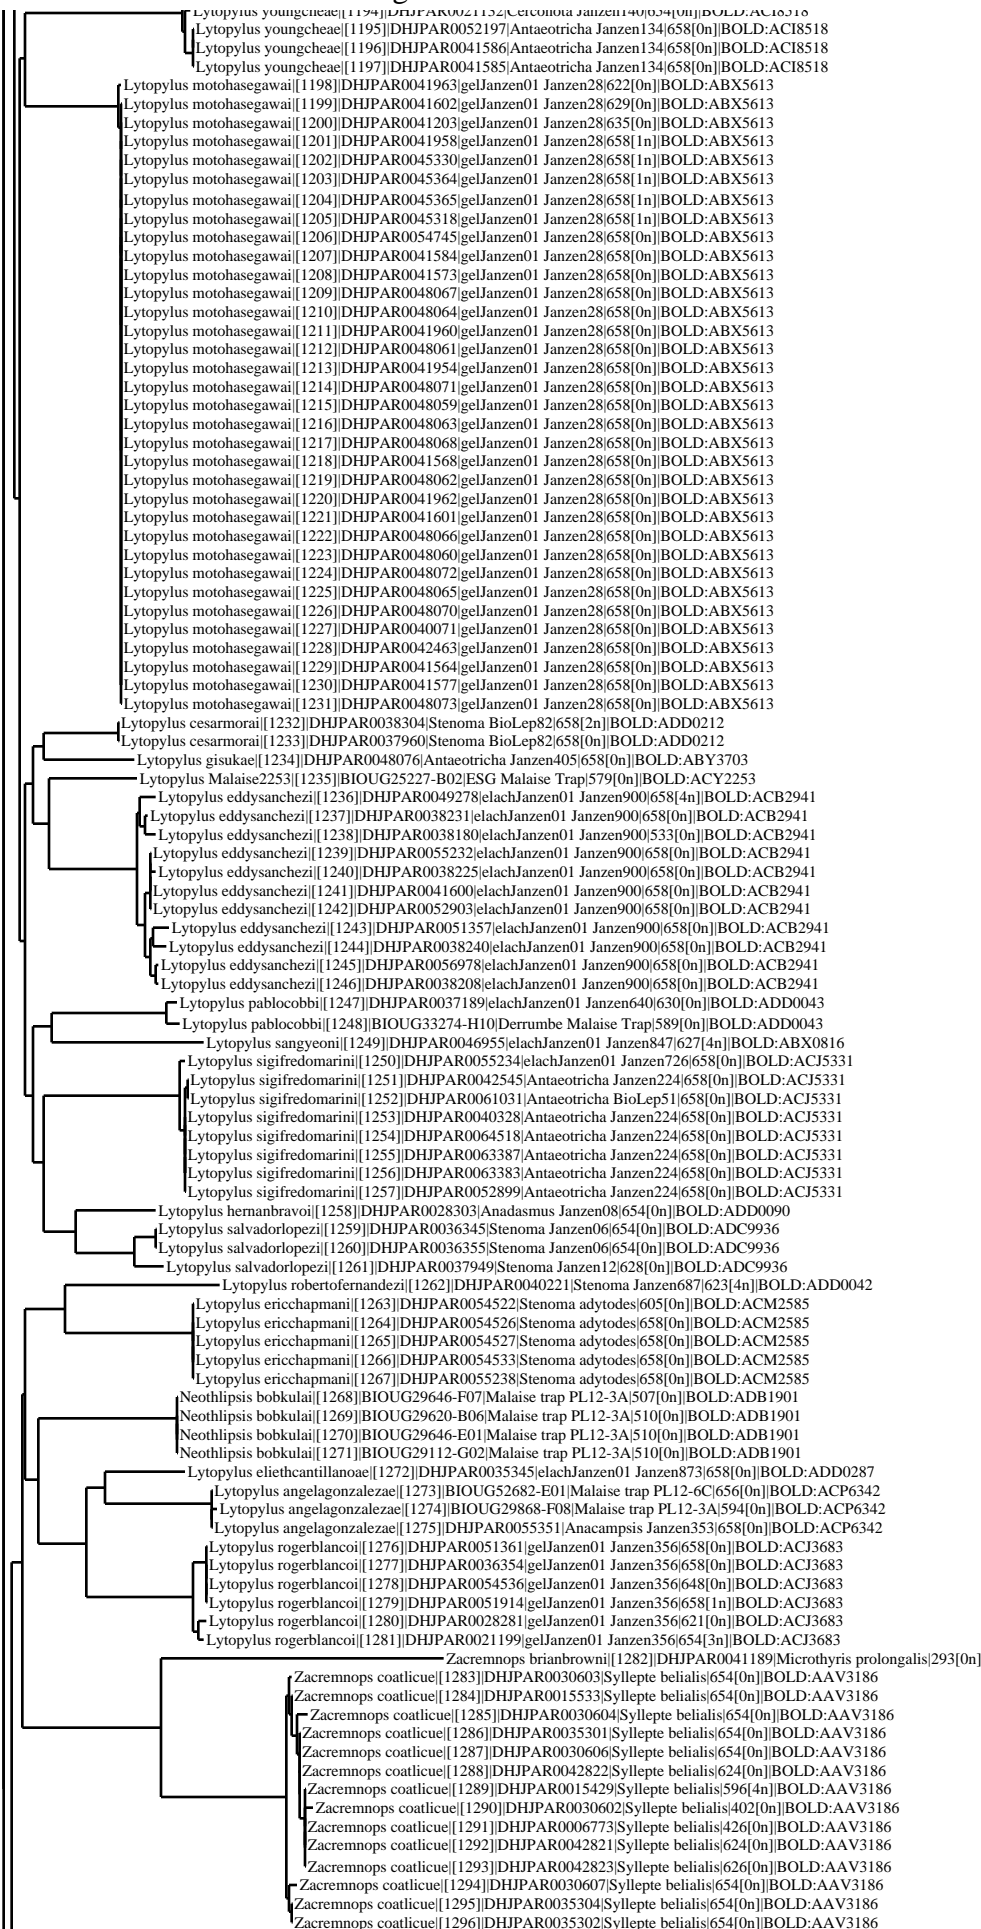

Zacrempnops coaticue[1294]DHJP0030607|Syllepte belialis[654]0n|BOLD:AAV3186  
 Zacrempnops coaticue[1295]DHJP0035304|Syllepte belialis[654]0n|BOLD:AAV3186  
 Zacrempnops coaticue[1296]DHJP0035302|Syllepte belialis[654]0n|BOLD:AAV3186  
 Aerophilus Janzen2677[1297]DHJP0051915|Polyortha Janzen226[658]0n|BOLD:ACJ2677  
 Aerophilus Janzen2677[1298]DHJP0055237|Polyortha Janzen226[658]0n|BOLD:ACJ2677  
 Aerophilus Janzen2677[1299]DHJP0051139|Polyortha Janzen226[571]1n|BOLD:ACJ2677  
 Aerophilus Janzen2677[1300]DHJP0051912|Polyortha Janzen226[658]0n|BOLD:ACJ2677  
 Aerophilus Janzen2677[1301]DHJP0055233|Polyortha Janzen226[658]0n|BOLD:ACJ2677  
 Aerophilus Janzen2677[1302]DHJP0055235|Polyortha Janzen226[658]0n|BOLD:ACJ2677  
 Aerophilus rebeccashapleyae[1303]DHJP0039507|Episimus ortygia[240]1n|  
 Aerophilus rebeccashapleyae[1304]DHJP0039521|Episimus ortygia[658]3n|BOLD:ACA4760  
 Aerophilus rebeccashapleyae[1305]DHJP0039525|Episimus ortygia[658]3n|BOLD:ACA4760  
 Aerophilus rebeccashapleyae[1306]DHJP0035369|Episimus ortygia[658]0n|BOLD:ACA4760  
 Aerophilus rebeccashapleyae[1307]DHJP0039506|Episimus ortygia[523]0n|BOLD:ACA4760  
 Aerophilus rebeccashapleyae[1308]DHJP0062168|Episimus ortygia[658]0n|BOLD:ACA4760  
 Aerophilus rebeccashapleyae[1309]DHJP0039522|Episimus ortygia[658]3n|BOLD:ACA4760  
 Aerophilus rebeccashapleyae[1310]DHJP0042838|Episimus ortygia[658]1n|BOLD:ACA4760  
 Aerophilus bradzlottickii[1311]DHJP0038366|Strepsicrates Brown25[623]1n|BOLD:ACA4771  
 Aerophilus bradzlottickii[1312]DHJP0036370|Platynota rostranaDHJ02[621]0n|BOLD:ACA4771  
 Aerophilus bradzlottickii[1313]DHJP0052189|Strepsicrates Brown37[658]3n|BOLD:ACA4771  
 Aerophilus bradzlottickii[1314]DHJP0037962|Strepsicrates Brown25[658]0n|BOLD:ACA4771  
 Aerophilus bradzlottickii[1315]DHJP0037961|Strepsicrates Brown25[658]0n|BOLD:ACA4771  
 Aerophilus bradzlottickii[1316]DHJP0038324|Strepsicrates Brown37[658]1n|BOLD:ACA4771  
 Aerophilus bradzlottickii[1317]DHJP0035489|Epinotia Brown12[286]0n|  
 Aerophilus paulmarshii[1318]BIUG29687-E06|Malaise trap PL12-3A[639]0n|BOLD:ADC6602  
 Aerophilus paulmarshii[1319]BIUG44697-A12|Malaise trap PL12-3B[653]2n|BOLD:ADC6602  
 Aerophilus vaughtnani[1320]DHJP0042836|Apotoforma Janzen305[658]1n|BOLD:ACD2639  
 Aerophilus vaughtnani[1321]DHJP0042830|Apotoforma Janzen305[658]1n|BOLD:ACD2639  
 Aerophilus vaughtnani[1322]DHJP0043042|Apotoforma Janzen305[658]1n|BOLD:ACD2639  
 Aerophilus vaughtnani[1323]DHJP0049048|Cacocharis cymotoma[658]0n|BOLD:ACD2639  
 Aerophilus vaughtnani[1324]DHJP0046950|Apotoforma Janzen305[658]0n|BOLD:ACD2639  
 Aerophilus vaughtnani[1325]DHJP0030608|gelJanzen01 Janzen348[654]0n|BOLD:ACD2639  
 Aerophilus vaughtnani[1326]DHJP0045300|Apotoforma Janzen305[658]0n|BOLD:ACD2639  
 Aerophilus vaughtnani[1327]DHJP0046949|Apotoforma Janzen305[658]0n|BOLD:ACD2639  
 Aerophilus vaughtnani[1328]DHJP0046951|Apotoforma Janzen305[658]1n|BOLD:ACD2639  
 Aerophilus vaughtnani[1329]DHJP0042839|Apotoforma Janzen305[614]0n|BOLD:ACD2639  
 Aerophilus vaughtnani[1330]DHJP0042841|Apotoforma Janzen305[493]0n|BOLD:ACD2639  
 Aerophilus vaughtnani[1331]DHJP0049052|Cacocharis cymotoma[658]0n|BOLD:ACD2639  
 Aerophilus vaughtnani[1332]DHJP0051913|Cacocharis cymotoma[658]0n|BOLD:ACD2639  
 Aerophilus Janzen13[1333]DHJP0054494|Loxiorhiza unitula[658]0n|BOLD:ACN0950  
 Aerophilus Janzen13[1334]DHJP0054547|Loxiorhiza unitula[658]0n|BOLD:ACN0950  
 Aerophilus Janzen14[1335]DHJP0055983|Tebenna Janzen02[658]0n|BOLD:ACT7814  
 Aerophilus robpringlei[1336]DHJP0039526|Chlamydistis montywoodi[658]4n|BOLD:ACA4814  
 Aerophilus robpringlei[1337]DHJP0035292|Stenomoma Janzen209[654]0n|BOLD:ACA4814  
 Aerophilus robpringlei[1338]DHJP0042840|Chlamydistis vividella[628]3n|  
 Aerophilus robpringlei[1339]DHJP0041557|Chlamydistis montywoodi[658]0n|BOLD:ACA4814  
 Aerophilus gregburtonii[1340]DHJP0036705|Desmia Solis19[620]1n|  
 Aerophilus colleenhitchockae[1341]DHJP0028280|Antaeotricha BioLep46[654]0n|BOLD:ACA4890  
 Aerophilus Sharkey1846[1342]DHJP0049941|Stenomoma completella[658]0n|BOLD:ACD1846  
 Aerophilus Sharkey4705[1343]DHJP0052902|Pilocrocis purpurascens[658]0n|BOLD:AAU4705  
 Aerophilus Sharkey1846[1344]DHJP0048079|Spilomela discordens[658]0n|BOLD:ACD1846  
 Aerophilus Sharkey0500[1345]DHJP0045363|gelJanzen01 Janzen241[657]0n|BOLD:ADD0500  
 Aerophilus Sharkey7813[1346]DHJP0056355|Ethmia lesliesaulae[658]0n|BOLD:ACT7813  
 Aerophilus jessiehillaeDHJ01[1347]DHJP0028306|Dysodia Janzen12[264]0n|  
 Aerophilus jessiehillae[1348]DHJP0052905|Dysodia Janzen35[658]15n|  
 Aerophilus jessiehillae[1349]DHJP0045019|Dysodia Janzen35[618]29n|  
 Aerophilus jessiehillae[1350]DHJP0059961|Dysodia Janzen12[657]18n|  
 Aerophilus jessiehillae[1351]DHJP0045023|Dysodia sica[661]4n|BOLD:ADC9733  
 Aerophilus jessiehillae[1352]DHJP0045026|Dysodia sica[585]20n|  
 Aerophilus jessiehillae[1353]DHJP0064396|Dysodia sica[653]2n|BOLD:ACA4726  
 Aerophilus jessiehillae[1354]DHJP0064393|spiloBioLep01 BioLep382[620]2n|BOLD:AEB4152  
 Aerophilus jessiehillae[1355]DHJP0045020|Dysodia Janzen35[661]0n|BOLD:AEB4152  
 Aerophilus jessiehillae[1356]DHJP0028256|Dysodia Janzen12[618]0n|BOLD:ACA4726  
 Aerophilus jessiehillae[1357]DHJP0028255|Dysodia Janzen12[606]0n|BOLD:ACA4726  
 Aerophilus jessiehillae[1358]DHJP0040226|Dysodia Janzen35[658]0n|BOLD:ACA4726  
 Aerophilus jessiehillae[1359]DHJP0062685|siculobiolep01 biolep14[395]0n|  
 Aerophilus jessiehillae[1360]DHJP0062689|siculobiolep01 biolep14[395]0n|  
 Aerophilus jessiehillae[1361]DHJP0062687|siculobiolep01 biolep14[395]0n|  
 Aerophilus jessiehillae[1362]DHJP0040216|Dysodia Janzen35[523]0n|  
 Aerophilus jessiehillae[1363]DHJP0028319|Dysodia Janzen12[264]0n|  
 Aerophilus jessiehillaeDHJ01[1364]DHJP0028316|Dysodia Janzen12[264]0n|  
 Aerophilus jessiehillae[1365]DHJP0042820|Dysodia Janzen11[608]24n|  
 Aerophilus jessiehillae[1366]DHJP0055820|Dysodia Janzen11[608]21n|  
 Aerophilus jessiehillae[1367]DHJP0028257|Dysodia Janzen12[273]0n|  
 Aerophilus jessiehillae[1368]DHJP0028318|Dysodia Janzen35[264]0n|  
 Aerophilus jessiehillae[1369]DHJP0064394|Dysodia sica[653]10n|  
 Aerophilus jessiehillae[1370]DHJP0052731|Dysodia Janzen35[658]3n|BOLD:ACA4727  
 Aerophilus jessiehillae[1371]DHJP0015452|Dysodia spissicornis[618]2n|BOLD:ACA4727  
 Aerophilus jessiehillae[1372]DHJP0045025|Dysodia sica[661]1n|BOLD:ACA4727  
 Aerophilus jessiehillae[1373]DHJP0055971|Dysodia Janzen35[670]1n|BOLD:ACA4727  
 Aerophilus jessiehillae[1374]DHJP0028139|Dysodia Janzen35[631]2n|BOLD:ACA4727  
 Aerophilus jessiehillae[1375]DHJP0040224|Dysodia Janzen35[658]2n|BOLD:ACA4727  
 Aerophilus jessiehillae[1376]DHJP0015453|Dysodia spissicornis[531]1n|BOLD:ACA4727  
 Aerophilus jessiehillae[1377]DHJP0036720|Dysodia Janzen11[642]2n|BOLD:ADJ0302  
 Aerophilus jessiehillae[1378]DHJP0036692|Dysodia spissicornis[629]1n|BOLD:ADJ0302  
 Aerophilus jessiehillae[1379]DHJP0028317|Dysodia Janzen35[654]5n|  
 Amputoearinus alafumidis[1380]DHJP0028287|Dysodia spissicornis[261]0n|  
 Aerophilus mingfangi[1381]DHJP0055100|Zeuzerodes caenosa[604]27n|  
 Aerophilus mingfangiDHJ01[1382]DHJP0054500|Zeuzerodes caenosa[604]26n|  
 Aerophilus mingfangiDHJ01[1383]DHJP0050067|Zeuzerodes caenosa[658]20n|  
 Aerophilus mingfangiDHJ01[1384]DHJP0021150|Zeuzerodes caenosa[654]1n|BOLD:ACA4751  
 Aerophilus mingfangiDHJ01[1385]DHJP0053616|Zeuzerodes caenosa[624]0n|BOLD:ACA4751  
 Aerophilus mingfangiDHJ01[1386]DHJP0054523|Zeuzerodes caenosa[658]0n|BOLD:ACA4751  
 Aerophilus mingfangiDHJ01[1387]DHJP0050068|Zeuzerodes caenosa[658]2n|BOLD:ACA4751  
 Aerophilus mingfangiDHJ03[1388]DHJP0028268|Zeuzerodes caenosa[654]5n|  
 Aerophilus mingfangiDHJ03[1389]DHJP0041599|Zeuzerodes caenosa[625]13n|  
 Aerophilus mingfangiDHJ03[1390]DHJP0036340|Zeuzerodes caenosa[658]6n|  
 Aerophilus mingfangiDHJ03[1391]DHJP0050063|Zeuzerodes caenosa[658]9n|  
 Aerophilus mingfangiDHJ03[1392]DHJP0015532|Zeuzerodes caenosa[629]13n|  
 Aerophilus mingfangiDHJ03[1393]DHJP0037916|Zeuzerodes caenosa[658]11n|  
 Aerophilus mingfangiDHJ03[1394]DHJP0041590|Zeuzerodes caenosa[608]10n|  
 Aerophilus mingfangiDHJ03[1395]DHJP0054524|Zeuzerodes caenosa[608]17n|  
 Aerophilus mingfangiDHJ03[1396]DHJP0051917|Zeuzerodes caenosa[658]9n|

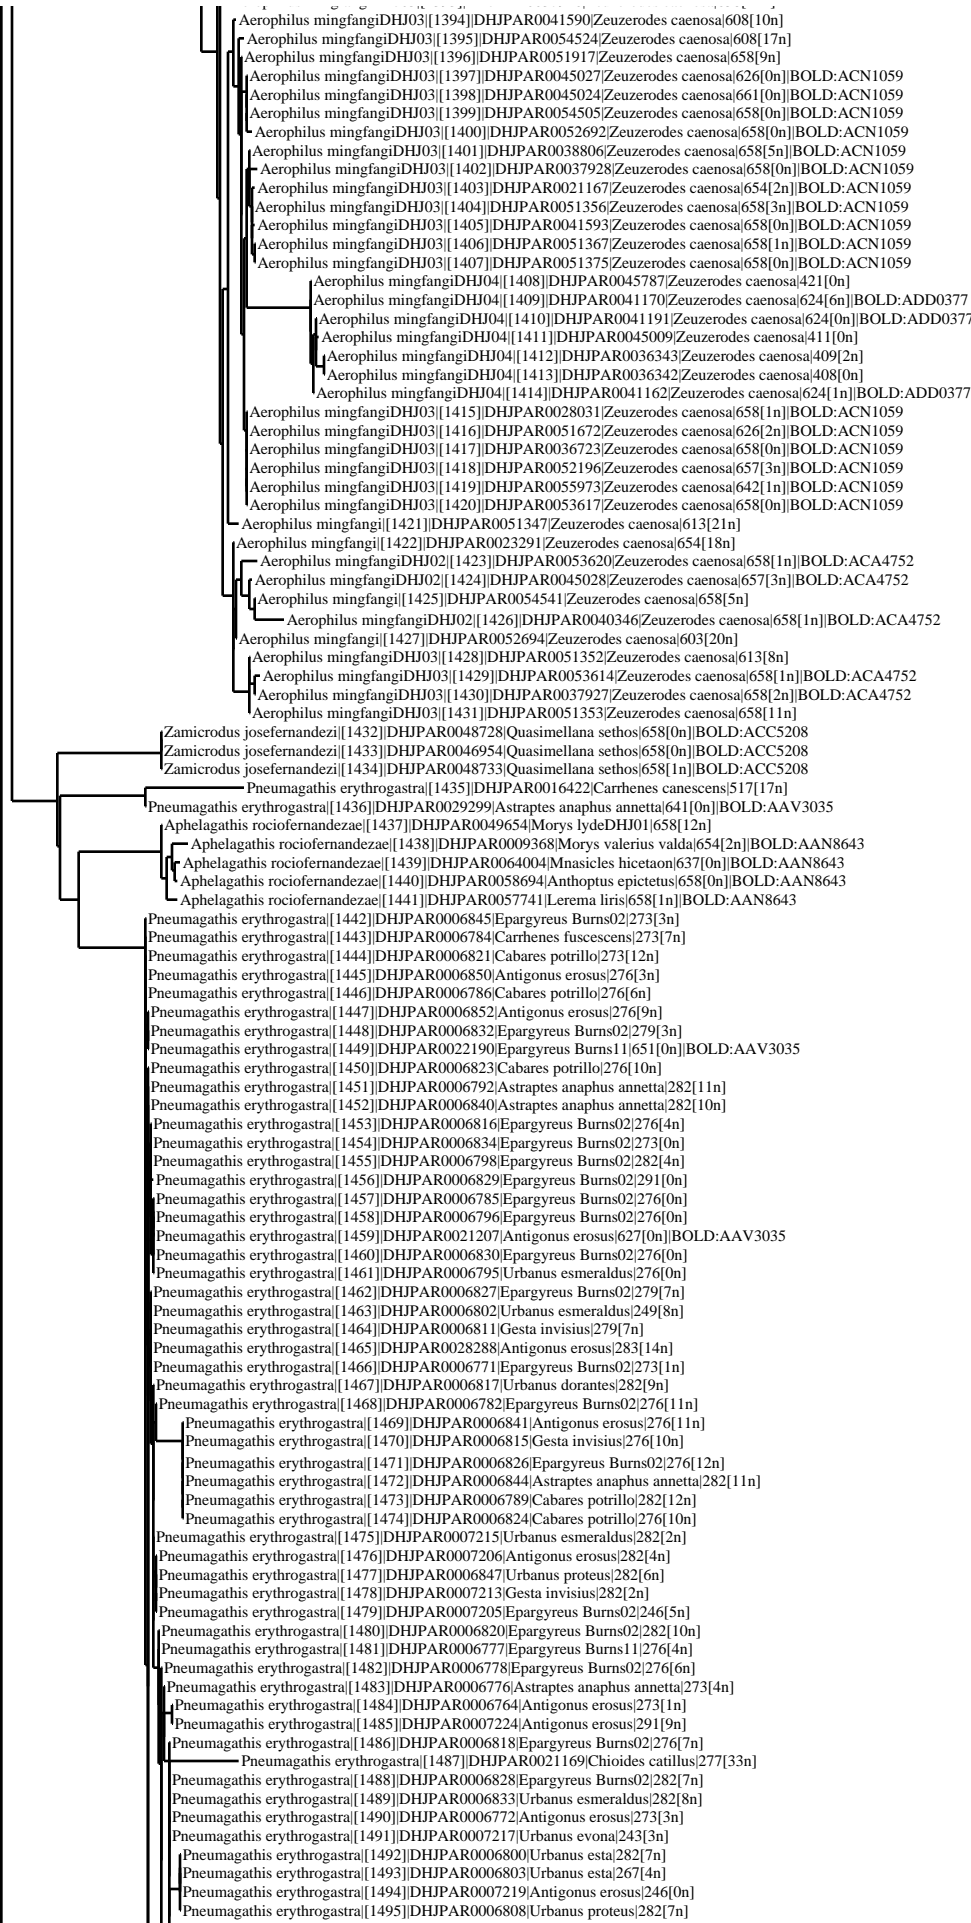





Lytopylus andreamezae[1593][DHJPAR0036722]Antaeotricha Janzen09|645[0n]|BOLD:ABU8129  
 Lytopylus andreamezae[1594][DHJPAR0036721]Antaeotricha Janzen09|624[0n]|BOLD:ABU8129  
 Lytopylus andreamezae[1595][DHJPAR0036686]Antaeotricha Janzen09|624[0n]|BOLD:ABU8129  
 Lytopylus andreamezae[1596][DHJPAR0054520]Antaeotricha ribbei|658[1n]|BOLD:ABU8129  
 Lytopylus andreamezae[1597][DHJPAR0054518]Antaeotricha Janzen09|658[1n]|BOLD:ABU8129  
 Lytopylus andreamezae[1598][DHJPAR0035229]Antaeotricha Janzen09|621[0n]|BOLD:ABU8129  
 Lytopylus andreamezae[1599][DHJPAR0035231]Antaeotricha Janzen09|654[0n]|BOLD:ABU8129  
 Lytopylus andreamezae[1600][DHJPAR0053618]Antaeotricha Janzen09|664[0n]|BOLD:ABU8129  
 Lytopylus andreamezae[1601][DHJPAR0053658]Antaeotricha Janzen09|658[0n]|BOLD:ABU8129  
 Lytopylus andreamezae[1602][DHJPAR0051360]Antaeotricha Janzen09|658[0n]|BOLD:ABU8129  
 Lytopylus andreamezae[1603][DHJPAR0051365]Antaeotricha Janzen12|658[0n]|BOLD:ABU8129  
 Lytopylus andreamezae[1604][DHJPAR0035294]Antaeotricha Janzen09|654[0n]|BOLD:ABU8129  
 Lytopylus andreamezae[1605][DHJPAR0053649]Antaeotricha Janzen09|658[0n]|BOLD:ABU8129  
 Lytopylus andreamezae[1606][DHJPAR0051370]Antaeotricha Janzen09|658[0n]|BOLD:ABU8129  
 Lytopylus andreamezae[1607][DHJPAR0054515]Antaeotricha Janzen09|658[0n]|BOLD:ABU8129  
 Lytopylus andreamezae[1608][DHJPAR0046956]Antaeotricha Janzen09|658[0n]|BOLD:ABU8129  
 Lytopylus andreamezae[1609][DHJPAR0046745]Antaeotricha Janzen07|658[0n]|BOLD:ABU8129  
 Lytopylus andreamezae[1610][DHJPAR0035298]Antaeotricha Janzen09|654[0n]|BOLD:ABU8129  
 Lytopylus andreamezae[1611][DHJPAR0036371]Antaeotricha Janzen09|621[2n]|BOLD:ABU8129  
 Lytopylus andreamezae[1612][DHJPAR0053645]Antaeotricha Janzen07|658[0n]|BOLD:ABU8129  
 Lytopylus andreamezae[1613][DHJPAR0054519]Antaeotricha Janzen07|658[0n]|BOLD:ABU8129  
 Lytopylus andreamezae[1614][DHJPAR0054534]Antaeotricha ribbei|658[0n]|BOLD:ABU8129  
 Lytopylus andreamezae[1615][DHJPAR0049943]Antaeotricha Janzen09|658[0n]|BOLD:ABU8129  
 Lytopylus andreamezae[1616][DHJPAR0054517]Antaeotricha Janzen09|658[0n]|BOLD:ABU8129  
 Lytopylus andreamezae[1617][DHJPAR0054539]Antaeotricha Janzen07|658[0n]|BOLD:ABU8129  
 Lytopylus andreamezae[1618][DHJPAR0054538]Antaeotricha Janzen07|658[0n]|BOLD:ABU8129  
 Lytopylus andreamezae[1619][DHJPAR0053621]Antaeotricha Janzen09|664[0n]|BOLD:ABU8129  
 Lytopylus andreamezae[1620][DHJPAR0045788]Antaeotricha Janzen07|658[0n]|BOLD:ABU8129  
 Lytopylus andreamezae[1621][DHJPAR0054511]Antaeotricha Janzen09|658[0n]|BOLD:ABU8129  
 Lytopylus andreamezae[1622][DHJPAR0051371]Antaeotricha Janzen09|658[0n]|BOLD:ABU8129  
 Lytopylus andreamezae[1623][DHJPAR0053619]Antaeotricha Janzen09|664[0n]|BOLD:ABU8129  
 Lytopylus andreamezae[1624][DHJPAR0051374]Antaeotricha Janzen09|658[0n]|BOLD:ABU8129  
 Lytopylus andreamezae[1625][DHJPAR0053655]Antaeotricha Janzen09|658[0n]|BOLD:ABU8129  
 Lytopylus andreamezae[1626][DHJPAR0046744]Antaeotricha Janzen09|658[0n]|BOLD:ABU8129  
 Lytopylus andreamezae[1627][DHJPAR0054532]Antaeotricha Janzen07|658[0n]|BOLD:ABU8129  
 Lytopylus andreamezae[1628][DHJPAR0053654]Antaeotricha Janzen09|658[0n]|BOLD:ABU8129  
 Lytopylus hokwoni[1629][DHJPAR0029302]Cerconota recurvella|261[1n]  
 Lytopylus hokwoni[1630][DHJPAR0015414]Cerconota recurvella|654[0n]|BOLD:ACB1292  
 Lytopylus hokwoni[1631][DHJPAR0037940]elachJanzen01 Janzen7940|658[0n]|BOLD:ACB1292  
 Lytopylus hokwoni[1632][DHJPAR0030605]Stenoma Janzen08|654[0n]|BOLD:ACB1292  
 Lytopylus hokwoni[1633][DHJPAR0028279]Antaeotricha Phillips01|627[0n]|BOLD:ACB1292  
 Lytopylus hokwoni[1634][DHJPAR0049051]elachJanzen01 Janzen211|634[0n]|BOLD:ACB1292  
 Lytopylus hokwoni[1635][DHJPAR0048714]Antaeotricha Janzen127|658[0n]|BOLD:ACB1292  
 Lytopylus hokwoni[1636][DHJPAR0017274]Cerconota recurvella|654[0n]|BOLD:ACB1292  
 Lytopylus Sharkey06DH01[1637][DHJPAR0048726]Stenoma Janzen08|658[0n]|BOLD:ACY8111  
 Lytopylus sergiobermudezi[1638]BIOUG55346-H08|Malaise trap PL12-9D|654[0n]|BOLD:ADA9104  
 Lytopylus sergiobermudezi[1639]BIOUG52724-H10|Malaise trap PL12-9C|653[0n]|BOLD:ADA9104  
 Lytopylus sergiobermudezi[1640]BIOUG55212-D08|Malaise trap PL12-5C|656[0n]|BOLD:ADA9104  
 Lytopylus sergiobermudezi[1641]DHJPAR0030601Dichomeris santarosensis|658[0n]|BOLD:ADA9104  
 Lytopylus sergiobermudezi[1642]BIOUG51910-E08|Malaise trap PL12-7B|652[0n]|BOLD:ADA9104  
 Lytopylus sergiobermudezi[1643]BIOUG51763-F08|Malaise trap PL12-3C|654[0n]|BOLD:ADA9104  
 Lytopylus sergiobermudezi[1644]BIOUG55212-D07|Malaise trap PL12-5C|654[0n]|BOLD:ADA9104  
 Lytopylus sergiobermudezi[1645]BIOUG55212-D10|Malaise trap PL12-5C|654[0n]|BOLD:ADA9104  
 Lytopylus sergiobermudezi[1646]BIOUG54474-F10|Malaise trap PL12-5C|640[0n]|BOLD:ADA9104  
 Lytopylus sergiobermudezi[1647]BIOUG53107-F03|Malaise trap PL12-6C|652[0n]|BOLD:ADA9104  
 Lytopylus sergiobermudezi[1648]BIOUG53340-E05|Malaise trap PL12-4C|652[0n]|BOLD:ADA9104  
 Lytopylus sergiobermudezi[1649]BIOUG53962-A09|Malaise trap PL12-9C|651[0n]|BOLD:ADA9104  
 Lytopylus sergiobermudezi[1650]BIOUG53378-D04|Malaise trap PL12-7C|652[0n]|BOLD:ADA9104  
 Lytopylus sergiobermudezi[1651]BIOUG54168-F12|Malaise trap PL12-5C|653[0n]|BOLD:ADA9104  
 Lytopylus sergiobermudezi[1652]BIOUG53616-G05|Malaise trap PL12-3C|654[0n]|BOLD:ADA9104  
 Lytopylus sergiobermudezi[1653]BIOUG53929-B04|Malaise trap PL12-9C|651[0n]|BOLD:ADA9104  
 Lytopylus sergiobermudezi[1654]BIOUG54846-D05|Malaise trap PL12-5C|652[0n]|BOLD:ADA9104  
 Lytopylus sergiobermudezi[1655]BIOUG52716-H09|Malaise trap PL12-9C|654[0n]|BOLD:ADA9104  
 Lytopylus sergiobermudezi[1656]BIOUG53968-A11|Malaise trap PL12-9C|654[0n]|BOLD:ADA9104  
 Lytopylus sergiobermudezi[1657]BIOUG54430-H07|Malaise trap PL12-6D|653[0n]|BOLD:ADA9104  
 Lytopylus sergiobermudezi[1658]BIOUG52824-D07|Malaise trap PL12-3C|653[0n]|BOLD:ADA9104  
 Lytopylus sergiobermudezi[1659]BIOUG52711-H05|Malaise trap PL12-9C|653[0n]|BOLD:ADA9104  
 Lytopylus sergiobermudezi[1660]BIOUG55212-C11|Malaise trap PL12-5C|654[0n]|BOLD:ADA9104  
 Lytopylus sergiobermudezi[1661]BIOUG53118-D12|Malaise trap PL12-9C|653[0n]|BOLD:ADA9104  
 Lytopylus sergiobermudezi[1662]BIOUG55212-D05|Malaise trap PL12-5C|656[0n]|BOLD:ADA9104  
 Lytopylus sergiobermudezi[1663]BIOUG55246-G06|Malaise trap PL12-8C|654[0n]|BOLD:ADA9104  
 Lytopylus sergiobermudezi[1664]BIOUG52720-A12|Malaise trap PL12-9C|657[0n]|BOLD:ADA9104  
 Lytopylus sergiobermudezi[1665]BIOUG55329-D06|Malaise trap PL12-6D|654[0n]|BOLD:ADA9104  
 Lytopylus sergiobermudezi[1666]BIOUG52684-H06|Malaise trap PL12-6C|654[0n]|BOLD:ADA9104  
 Lytopylus sergiobermudezi[1667]BIOUG53929-C10|Malaise trap PL12-9C|640[0n]|BOLD:ADA9104  
 Lytopylus sergiobermudezi[1668]BIOUG53155-C07|Malaise trap PL12-9C|652[0n]|BOLD:ADA9104  
 Lytopylus sergiobermudezi[1669]BIOUG28680-C05|Malaise trap PL12-9A|591[0n]|BOLD:ADA9104  
 Lytopylus sergiobermudezi[1670]BIOUG56081-B06|Malaise trap PL12-9D|640[0n]|BOLD:ADA9104  
 Lytopylus sergiobermudezi[1671]BIOUG28804-B07|Malaise trap PL12-6A|588[0n]|BOLD:ADA9104  
 Lytopylus sergiobermudezi[1672]BIOUG28680-A06|Malaise trap PL12-9A|585[0n]|BOLD:ADA9104  
 Lytopylus sergiobermudezi[1673]BIOUG29390-C03|Malaise trap PL12-9A|594[0n]|BOLD:ADA9104  
 Lytopylus sergiobermudezi[1674]BIOUG28680-A05|Malaise trap PL12-9A|594[0n]|BOLD:ADA9104  
 Lytopylus sergiobermudezi[1675]BIOUG29142-G01|Malaise trap PL12-1A|588[0n]|BOLD:ADA9104  
 Lytopylus sergiobermudezi[1676]DHJPAR0034286Dichomeris santarosensis|653[0n]|BOLD:ADA9104  
 Lytopylus sergiobermudezi[1677]BIOUG30927-E08|Malaise trap PL12-2A|561[0n]|BOLD:ADA9104  
 Lytopylus sergiobermudezi[1678]BIOUG29142-G02|Malaise trap PL12-1A|564[0n]|BOLD:ADA9104  
 Lytopylus sergiobermudezi[1679]BIOUG55356-A12|Malaise trap PL12-9D|655[0n]|BOLD:ADA9104  
 Lytopylus sergiobermudezi[1680]BIOUG54116-H07|Malaise trap PL12-2C|653[0n]|BOLD:ADA9104  
 Lytopylus sergiobermudezi[1681]BIOUG28809-E07|Malaise trap PL12-6A|594[0n]|BOLD:ADA9104  
 Lytopylus sergiobermudezi[1682]BIOUG28599-C11|Malaise trap PL12-1X|594[0n]|BOLD:ADA9104  
 Lytopylus sergiobermudezi[1683]BIOUG53614-A06|Malaise trap PL12-3C|653[0n]|BOLD:ADA9104  
 Lytopylus sergiobermudezi[1684]BIOUG56235-E11|Malaise trap PL12-6D|655[0n]|BOLD:ADA9104  
 Lytopylus sergiobermudezi[1685]BIOUG56081-E09|Malaise trap PL12-9D|650[0n]|BOLD:ADA9104  
 Lytopylus sergiobermudezi[1686]BIOUG52720-B05|Malaise trap PL12-9C|652[0n]|BOLD:ADA9104  
 Lytopylus sergiobermudezi[1687]BIOUG46359-E03|Malaise trap PL12-6B|654[0n]|BOLD:ADA9104  
 Lytopylus sergiobermudezi[1688]BIOUG55056-A01|Malaise trap PL12-8C|652[0n]|BOLD:ADA9104  
 Lytopylus johnvalerioii[1689]DHJPAR0049935Cerconota Janzen82|658[2n]|BOLD:ACC1326  
 Lytopylus johnvalerioii[1690]DHJPAR0040066Cerconota Janzen216|658[0n]|BOLD:ACC1326  
 Lytopylus johnvalerioii[1691]DHJPAR0035498Cerconota Janzen216|658[0n]|BOLD:ACC1326  
 Lytopylus johnvalerioii[1692]DHJPAR005354Cerconota Janzen82|658[0n]|BOLD:ACC1326  
 Lytopylus johnvalerioii[1693]DHJPAR0056634Cerconota Janzen82|658[2n]|BOLD:ACC1326
