# Supplementary material for: Minimalist revision and description of 403 new species in 11 subfamilies of Costa Rican braconid parasitoid wasps, including host records for 219 species
Source: PubMed Central journal article supplement (PMC8390796; doi:10.3897/zookeys.1013.55600), 2021-02-02
Supplement: zookeys-1013-001-s003.pdf [file zookeys-1013-001-s003.pdf]

### 3. Cheloninae BOLD TaxonID Tree

Title : Tree Result - Search: Sample IDs (1544 records returned) (1544 records selected)

Date : 17-Nov-2020

Data Type : Nucleotide

Distance Model : Kimura 2 Parameter

Marker : COI-5P

Colourization : [blue]=Stop Codons [red]=Contamination or misidentification

Label : Sample ID

Label : Taxon

Label : Extra Info

Label : Sequence Length

Label : Barcode Cluster (BIN)

Filter : exclude records with stop codons

Sequence Count : 1471

Species count : 150

Genus count : 6

Family count : 1

Unidentified : 41

BIN Count : 146

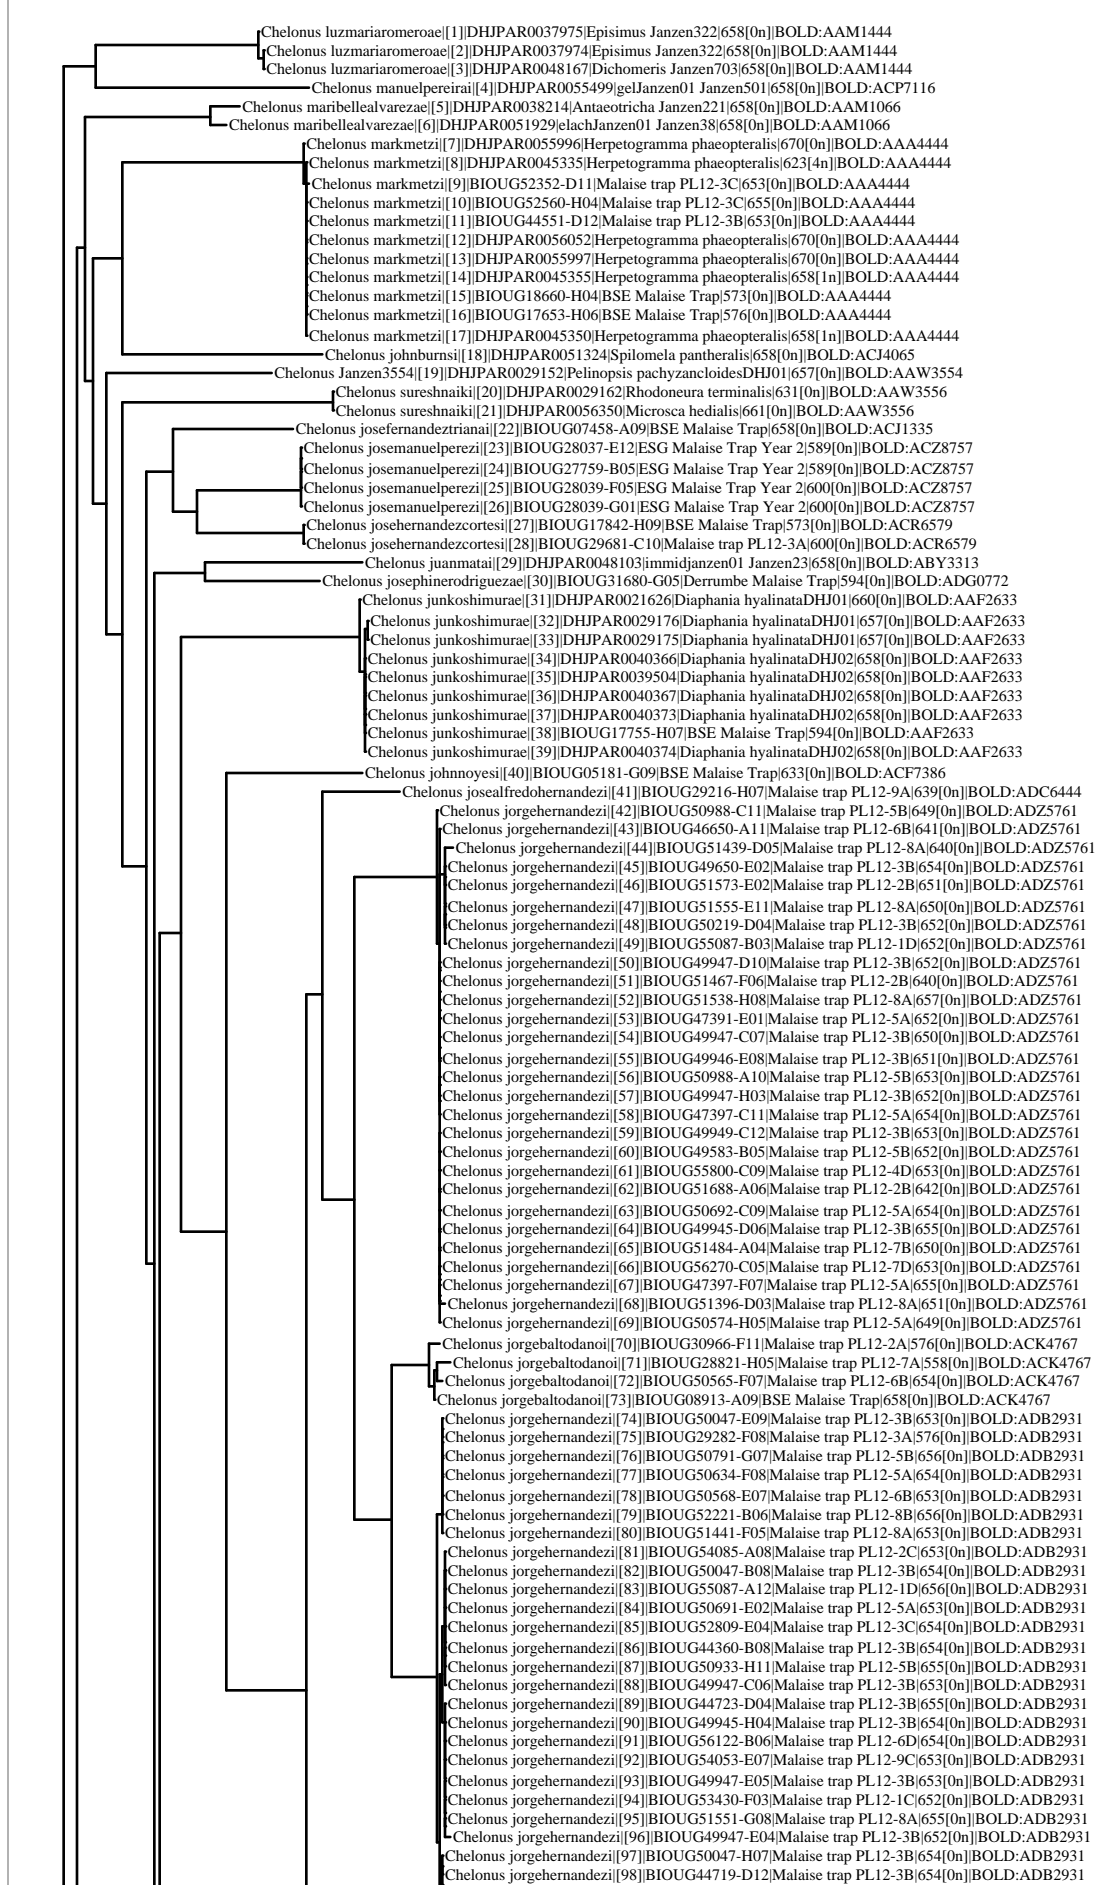

Chelonius jorgehernandezii[90]BIOUG4994-7-E04Malaise trap PL12-3B[654]BOLD:ADB2931  
Chelonius jorgehernandezii[97]BIOUG50047-H07Malaise trap PL12-3B[654]BOLD:ADB2931  
Chelonius jorgehernandezii[98]BIOUG44719-D12Malaise trap PL12-3B[654]BOLD:ADB2931  
Chelonius jorgehernandezii[99]BIOUG50048-G03Malaise trap PL12-3B[653]BOLD:ADB2931  
Chelonius jorgehernandezii[100]BIOUG49949-B04Malaise trap PL12-3B[654]BOLD:ADB2931  
Chelonius jorgehernandezii[101]BIOUG55656-C07Malaise trap PL12-1D[654]BOLD:ADB2931  
Chelonius jorgehernandezii[102]BIOUG54760-B12Malaise trap PL12-5C[655]BOLD:ADB2931  
Chelonius jorgehernandezii[103]BIOUG49982-A05Malaise trap PL12-3B[653]BOLD:ADB2931  
Chelonius jorgehernandezii[104]BIOUG56256-G07Malaise trap PL12-6D[654]BOLD:ADB2931  
Chelonius jorgehernandezii[105]BIOUG49947-H08Malaise trap PL12-3B[654]BOLD:ADB2931  
Chelonius jorgehernandezii[106]BIOUG50058-A05Malaise trap PL12-3B[655]BOLD:ADB2931  
Chelonius jorgehernandezii[107]BIOUG50219-B03Malaise trap PL12-3B[654]BOLD:ADB2931  
Chelonius jorgehernandezii[108]BIOUG49945-B04Malaise trap PL12-3B[654]BOLD:ADB2931  
Chelonius jorgehernandezii[109]BIOUG49583-B06Malaise trap PL12-5B[654]BOLD:ADB2931  
Chelonius jorgehernandezii[110]BIOUG50092-C11Malaise trap PL12-3B[653]BOLD:ADB2931  
Chelonius jorgehernandezii[111]BIOUG52254-E04Malaise trap PL12-8B[653]BOLD:ADB2931  
Chelonius jorgehernandezii[112]BIOUG50988-C03Malaise trap PL12-5B[654]BOLD:ADB2931  
Chelonius jorgehernandezii[113]BIOUG49558-H09Malaise trap PL12-5B[654]BOLD:ADB2931  
Chelonius jorgehernandezii[114]BIOUG49367-B04Malaise trap PL12-5A[654]BOLD:ADB2931  
Chelonius jorgehernandezii[115]BIOUG47397-E06Malaise trap PL12-5A[654]BOLD:ADB2931  
Chelonius jorgehernandezii[116]BIOUG51658-E10Malaise trap PL12-2B[652]BOLD:ADB2931  
Chelonius jorgehernandezii[117]BIOUG49945-D07Malaise trap PL12-3B[654]BOLD:ADB2931  
Chelonius jorgehernandezii[118]BIOUG29803-C11Malaise trap PL12-3A[612]BOLD:ADB2931  
Chelonius jorgehernandezii[119]BIOUG49714-G03Malaise trap PL12-1B[656]BOLD:ADB2931  
Chelonius jorgehernandezii[120]BIOUG56702-A05Malaise trap PL12-9D[654]BOLD:ADB2931  
Chelonius jorgehernandezii[121]BIOUG50048-F04Malaise trap PL12-3B[652]BOLD:ADB2931  
Chelonius Janzen4215[122]BIOUG54657-C06Malaise trap PL12-5C[654]BOLD:AEA4215  
Chelonius Janzen4215[123]BIOUG49892-B07Malaise trap PL12-3B[654]BOLD:AEA4215  
Chelonius Janzen4215[124]BIOUG52044-A01Malaise trap PL12-9B[655]BOLD:AEA4215  
Chelonius Janzen4215[125]BIOUG49982-G10Malaise trap PL12-3B[655]BOLD:AEA4215  
Chelonius Janzen4215[126]BIOUG50794-C08Malaise trap PL12-5B[654]BOLD:AEA4215  
Chelonius Janzen4215[127]BIOUG49945-A11Malaise trap PL12-3B[653]BOLD:AEA4215  
Chelonius johanvalerioi[128]DHJPAR0055397Phostria latiapicalis[658]BOLD:AAF2611  
Chelonius johanvalerioi[129]DHJPAR0048106Pilocrocis purpurascens[658]BOLD:AAF2611  
Chelonius johanvalerioi[130]DHJPAR0055951Pilocrocis purpurascens[670]BOLD:AAF2611  
Chelonius johanvalerioi[131]DHJPAR0056967Pilocrocis purpurascens[616]BOLD:AAF2611  
Chelonius johanvalerioi[132]DHJPAR0055381Phostria latiapicalis[658]BOLD:AAF2611  
Chelonius johanvalerioi[133]DHJPAR0052096Pilocrocis purpurascens[658]BOLD:AAF2611  
Chelonius johanvalerioi[134]DHJPAR0042092Pilocrocis purpurascens[658]BOLD:AAF2611  
Chelonius johanvalerioi[135]DHJPAR0055398Phostria latiapicalis[658]BOLD:AAF2611  
Chelonius johanvalerioi[136]DHJPAR0029142Pilocrocis purpurascens[657]BOLD:AAF2611  
Chelonius johanvalerioi[137]DHJPAR0057409Pilocrocis purpurascens[658]BOLD:AAF2611  
Chelonius johanvalerioi[138]DHJPAR0042090Ceratocilia Janzen02[658]BOLD:AAF2611  
Chelonius johanvalerioi[139]DHJPAR0036388Pilocrocis purpurascens[569]BOLD:AAF2611  
Chelonius johanvalerioi[140]DHJPAR0039119Ceratocilia Janzen02[630]BOLD:AAF2611  
Chelonius johanvalerioi[141]DHJPAR0036728Pilocrocis purpurascens[509]BOLD:AAF2611  
Chelonius johanvalerioi[142]DHJPAR0042087Pilocrocis purpurascens[658]BOLD:AAF2611  
Chelonius johanvalerioi[143]DHJPAR0057408Pilocrocis purpurascens[658]BOLD:AAF2611  
Chelonius Janzen201[144]DHJPAR0029173Herpetogramma Janzen04[229]BOLD:AAF2611  
Chelonius Janzen201[145]DHJPAR0029150Spoladea recurvalis[271]BOLD:AAF2611  
Chelonius jimwhitfieldi[146]DHJPAR0050073Prenesta scyllalisDHJ01[658]BOLD:ACC1273  
Chelonius jimwhitfieldi[147]DHJPAR0050070Prenesta scyllalis[658]BOLD:ACC1273  
Chelonius jesusalgaldei[148]DHJPAR0048100Herpetogramma phaeopteralis[658]BOLD:ABY3312  
Chelonius jessiehillae[149]DHJPAR0042088gelJanzen01 Janzen349[658]BOLD:AAW4588  
Chelonius jimmilleri[150]DHJPAR0062578Antaeotricha Janzen78[658]BOLD:ADM8275  
Chelonius jimmilleri[151]DHJPAR0062577Antaeotricha Janzen78[658]BOLD:ADM8275  
Chelonius jimmilleri[152]DHJPAR0062576Antaeotricha Janzen78[658]BOLD:ADM8275  
Chelonius jimlewisi[153]DHJPAR0029137Neoleucinodes Janzen02[657]BOLD:AAF2610  
Chelonius jimlewisi[154]DHJPAR0029148Neoleucinodes Janzen02[657]BOLD:AAF2610  
Chelonius jimlewisi[155]DHJPAR0030973Neoleucinodes Janzen02[657]BOLD:AAF2610  
Chelonius jimlewisi[156]DHJPAR0051336Neoleucinodes Janzen02[658]BOLD:AAF2610  
Chelonius jimlewisi[157]DHJPAR0054553Neoleucinodes alegrealis[658]BOLD:AAF2610  
Chelonius jimlewisi[158]DHJPAR0054556Neoleucinodes alegrealis[658]BOLD:AAF2610  
Chelonius jimlewisi[159]DHJPAR0054551Neoleucinodes alegrealis[658]BOLD:AAF2610  
Chelonius Janzen645[160]DHJPAR0064502Desmia benealis[658]BOLD:AEB3509  
Chelonius Janzen645[161]DHJPAR0064501Desmia benealis[658]BOLD:AEB3509  
Chelonius Janzen645[162]DHJPAR0064500Desmia benealis[622]BOLD:AEB3509  
Chelonius janecheverriae[163]DHJPAR0039179CrambidJanzen01 Janzen27[599]BOLD:AAL5555  
Chelonius jennyphillipsae[164]DHJPAR0053682Eulepte Janzen12[658]BOLD:ACL6996  
Chelonius jeffmilleri[165]DHJPAR0040375Phostria oajacalis[614]BOLD:ACF0845  
Chelonius jeffmilleri[166]DHJPAR0042862Eulepte Solis15[658]BOLD:ACF0845  
Chelonius jeffmilleri[167]DHJPAR0042859Eulepte Solis15[658]BOLD:ACF0845  
Chelonius jeremydewaardi[168]DHJPAR0037989Patania Solis04[658]BOLD:AAB1653  
Chelonius jeremydewaardi[169]DHJPAR0051337Asturodes fimbriaralis[658]BOLD:AAB1653  
Chelonius jeremydewaardi[170]DHJPAR0042084Herpetogramma salbialis[658]BOLD:AAB1653  
Chelonius jeremydewaardi[171]DHJPAR0037982Patania Solis04[658]BOLD:AAB1653  
Chelonius jeremydewaardi[172]DHJPAR0037981Patania Solis04[658]BOLD:AAB1653  
Chelonius jeremydewaardi[173]DHJPAR0053674Herpetogramma salbialis[658]BOLD:AAB1653  
Chelonius jeremydewaardi[174]DHJPAR0046798Omiodes fulvicauda[658]BOLD:AAB1653  
Chelonius jeremydewaardi[175]DHJPAR0046935Omiodes fulvicauda[658]BOLD:AAB1653  
Chelonius jeremydewaardi[176]DHJPAR0045403Microthyris prolongalisDHJ02[658]BOLD:AAB1653  
Chelonius jeremydewaardi[177]DHJPAR0048104Leucochromodes melusinalisDHJ02[658]BOLD:AAB1653  
Chelonius jeremydewaardi[178]DHJPAR0062182Desmia Janzen03[658]BOLD:AAB1653  
Chelonius jeremydewaardi[179]DHJPAR0062188Desmia Janzen03[658]BOLD:AAB1653  
Chelonius jeremydewaardi[180]DHJPAR0062190Desmia Janzen03[658]BOLD:AAB1653  
Chelonius jeremydewaardi[181]DHJPAR0040364Microthyris prolongalis[658]BOLD:AAB1653  
Chelonius jeremydewaardi[182]DHJPAR0029070Desmia benealisDHJ02[657]BOLD:AAB1653  
Chelonius jeremydewaardi[183]DHJPAR0050072spiloBioLep01 BioLep311[658]BOLD:AAB1653  
Chelonius jeremydewaardi[184]DHJPAR0062184Desmia Janzen03[658]BOLD:AAB1653  
Chelonius jeremydewaardi[185]DHJPAR0042860Eulepte Solis15[658]BOLD:AAB1653  
Chelonius jeremydewaardi[186]DHJPAR0048097Psara obscuralisDHJ01[658]BOLD:AAB1653  
Chelonius jeremydewaardi[187]DHJPAR0062189Desmia Janzen03[658]BOLD:AAB1653  
Chelonius jeremydewaardi[188]DHJPAR0048973Patania Solis03[658]BOLD:AAB1653  
Chelonius jeremydewaardi[189]DHJPAR0062187Desmia Janzen03[658]BOLD:AAB1653  
Chelonius jeremydewaardi[190]DHJPAR0062181Desmia Janzen03[658]BOLD:AAB1653  
Chelonius jeremydewaardi[191]DHJPAR0035315Herpetogramma Solis10[658]BOLD:AAB1653  
Chelonius jeremydewaardi[192]DHJPAR0052891Microthyris prolongalis[658]BOLD:AAB1653  
Chelonius jeremydewaardi[193]DHJPAR0062185Desmia Janzen03[658]BOLD:AAB1653  
Chelonius jeremydewaardi[194]DHJPAR0042093Phostria cyrisalis[658]BOLD:AAB1653  
Chelonius jeremydewaardi[195]DHJPAR0053681Herpetogramma salbialis[658]BOLD:AAB1653  
Chelonius jeremydewaardi[196]DHJPAR0035311Herpetogramma Solis10[658]BOLD:AAB1653

Chelonus jeremydewaardi[195][DHJPAR0053681][Herpetogramma salbialis][658[0n]]BOLD:AAB1653  
Chelonus jeremydewaardi[196][DHJPAR0035311][Herpetogramma Solis10][658[0n]]BOLD:AAB1653  
Chelonus jeremydewaardi[197][DHJPAR0062186][Desmia Janzen03][658[0n]]BOLD:AAB1653  
Chelonus jeremydewaardi[198][DHJPAR0035309][Eulepte Solis15][658[0n]]BOLD:AAB1653  
Chelonus jeremydewaardi[199][DHJPAR0062191][Desmia Janzen03][658[0n]]BOLD:AAB1653  
Chelonus jeremydewaardi[200][DHJPAR0029117][Asturodes fimbriauralis][657[0n]]BOLD:AAB1653  
Chelonus jeremydewaardi[201][DHJPAR0055370][Syllepsis marialis][658[0n]]BOLD:AAB1653  
Chelonus jeremydewaardi[202][DHJPAR0062183][Desmia Janzen03][658[0n]]BOLD:AAB1653  
Chelonus jeremydewaardi[203][DHJPAR0036400][Asturodes fimbriauralis][658[0n]]BOLD:AAB1653  
Chelonus jeremydewaardi[204][DHJPAR0056949][Herpetogramma salbialis][661[0n]]BOLD:AAB1653  
Chelonus jeremydewaardi[205][DHJPAR0048094][Psara obscuralis][658[0n]]BOLD:AAB1653  
Chelonus jeremydewaardi[206][DHJPAR0045402][Microthyris prolongalis][657[0n]]BOLD:AAB1653  
Chelonus jeremydewaardi[207][DHJPAR0052887][Desmia Solis100][658[0n]]BOLD:AAB1653  
Chelonus jeremydewaardi[208][DHJPAR0055376][Syllepsis marialis][658[0n]]BOLD:AAB1653  
Chelonus jeremydewaardi[209][DHJPAR0039121][Asturodes fimbriauralis][658[0n]]BOLD:AAB1653  
Chelonus jeremydewaardi[210][DHJPAR0062180][Desmia Janzen03][658[0n]]BOLD:AAB1653  
Chelonus jeremydewaardi[211][DHJPAR0037182][Patania Solis04][658[0n]]BOLD:AAB1653  
Chelonus jeremydewaardi[212][DHJPAR0048093][Psara obscuralis][658[0n]]BOLD:AAB1653  
Chelonus jeremydewaardi[213][DHJPAR0042096][Patania Solis04][658[0n]]BOLD:AAB1653  
Chelonus jeremydewaardi[214][DHJPAR0048092][Psara obscuralis][658[0n]]BOLD:AAB1653  
Chelonus jeremydewaardi[215][DHJPAR0037979][Rhectocraspeda periusalis][658[0n]]BOLD:AAB1653  
Chelonus jeremydewaardi[216][DHJPAR0040368][Phostria oajacalis][658[0n]]BOLD:AAB1653  
Chelonus jeremydewaardi[217][DHJPAR0048091][Psara obscuralis][658[0n]]BOLD:AAB1653  
Chelonus jeremydewaardi[218][DHJPAR0045408][Asturodes fimbriauralis][656[3n]]BOLD:AAB1653  
Chelonus jeremydewaardi[219][DHJPAR0042857][Eulepte Solis15][633[0n]]BOLD:AAB1653  
Chelonus jeremydewaardi[220][DHJPAR0037862][Ceratocilia sixolalis][658[0n]]BOLD:AAB1653  
Chelonus jeremydewaardi[221][DHJPAR0048169][Desmia ploralis][658[0n]]BOLD:AAB1653  
Chelonus jeremydewaardi[222][DHJPAR0058149][Asturodes fimbriauralis][658[0n]]BOLD:AAB1653  
Chelonus jeremydewaardi[223][DHJPAR0029069][Salbia cassidialis][657[0n]]BOLD:AAB1653  
Chelonus jeremydewaardi[224][DHJPAR0039502][Asturodes fimbriauralis][658[0n]]BOLD:AAB1653  
Chelonus torbjornekreml[225][DHJPAR0045404][spiloJanzen01 Janzen57][541[19n]]  
Chelonus torbjornekreml[226][DHJPAR0056964][pyrausJanzen01 Janzen26][658[0n]]BOLD:ACZ0402  
Chelonus torbjornekreml[227][DHJPAR0060594][pyrausJanzen01 Janzen26][658[0n]]BOLD:ACZ0402  
Chelonus torbjornekreml[228][DHJPAR0061493][Aponia Janzen469][658[0n]]BOLD:ACZ0402  
Chelonus hazelcambroeroae[229][DHJPAR0022199][Prenesta scyllalis][657[0n]]BOLD:AAE9128  
Chelonus hazelcambroeroae[230][DHJPAR0030988][Prenesta scyllalis][657[0n]]BOLD:AAE9128  
Chelonus hazelcambroeroae[231][DHJPAR0030990][Prenesta scyllalis][657[0n]]BOLD:AAE9128  
Chelonus hazelcambroeroae[232][DHJPAR0030989][Prenesta scyllalis][657[0n]]BOLD:AAE9128  
Chelonus hazelcambroeroae[233][DHJPAR0049930][Prenesta scyllalis][658[0n]]BOLD:AAE9128  
Chelonus isidrochaconi[234][DHJPAR0037173][Parastenia retractalis][655[0n]]BOLD:AAC8260  
Chelonus isidrochaconi[235][DHJPAR0037181][Parastenia retractalis][633[0n]]BOLD:AAC8260  
Chelonus isidrochaconi[236][DHJPAR0037162][Parastenia retractalis][658[0n]]BOLD:AAC8260  
Chelonus isidrochaconi[237][DHJPAR0037176][Parastenia retractalis][658[0n]]BOLD:AAC8260  
Chelonus isidrochaconi[238][DHJPAR0037174][Parastenia retractalis][626[0n]]BOLD:AAC8260  
Chelonus isidrochaconi[239][DHJPAR0037159][Parastenia retractalis][606[0n]]BOLD:AAC8260  
Chelonus isidrochaconi[240][DHJPAR0037166][Parastenia retractalis][646[0n]]BOLD:AAC8260  
Chelonus isidrochaconi[241][DHJPAR0037172][Parastenia retractalis][654[0n]]BOLD:AAC8260  
Chelonus isidrochaconi[242][DHJPAR0037179][Parastenia retractalis][658[0n]]BOLD:AAC8260  
Chelonus isidrochaconi[243][DHJPAR0049019][Parastenia retractalis][658[0n]]BOLD:AAC8260  
Chelonus isidrochaconi[244][DHJPAR0049008][Parastenia retractalis][658[0n]]BOLD:AAC8260  
Chelonus isidrochaconi[245][DHJPAR0049038][Parastenia retractalis][658[0n]]BOLD:AAC8260  
Chelonus isidrochaconi[246][DHJPAR0049041][Parastenia retractalis][658[0n]]BOLD:AAC8260  
Chelonus isidrochaconi[247][DHJPAR0049028][Parastenia retractalis][658[0n]]BOLD:AAC8260  
Chelonus isidrochaconi[248][DHJPAR0049015][Parastenia retractalis][658[0n]]BOLD:AAC8260  
Chelonus isidrochaconi[249][DHJPAR0049030][Parastenia retractalis][658[0n]]BOLD:AAC8260  
Chelonus isidrochaconi[250][DHJPAR0048990][Parastenia retractalis][658[0n]]BOLD:AAC8260  
Chelonus isidrochaconi[251][DHJPAR0049035][Parastenia retractalis][658[0n]]BOLD:AAC8260  
Chelonus isidrochaconi[252][DHJPAR0048997][Parastenia retractalis][658[0n]]BOLD:AAC8260  
Chelonus isidrochaconi[253][DHJPAR0049016][Parastenia retractalis][658[0n]]BOLD:AAC8260  
Chelonus isidrochaconi[254][DHJPAR0048999][Parastenia retractalis][658[0n]]BOLD:AAC8260  
Chelonus isidrochaconi[255][DHJPAR0049012][Parastenia retractalis][658[0n]]BOLD:AAC8260  
Chelonus isidrochaconi[256][DHJPAR0049004][Parastenia retractalis][658[0n]]BOLD:AAC8260  
Chelonus isidrochaconi[257][DHJPAR0049005][Parastenia retractalis][658[0n]]BOLD:AAC8260  
Chelonus isidrochaconi[258][DHJPAR0048998][Parastenia retractalis][658[0n]]BOLD:AAC8260  
Chelonus isidrochaconi[259][DHJPAR0049002][Parastenia retractalis][658[0n]]BOLD:AAC8260  
Chelonus isidrochaconi[260][DHJPAR0048991][Parastenia retractalis][658[0n]]BOLD:AAC8260  
Chelonus isidrochaconi[261][DHJPAR0048983][Parastenia retractalis][658[0n]]BOLD:AAC8260  
Chelonus isidrochaconi[262][DHJPAR0049040][Parastenia retractalis][658[0n]]BOLD:AAC8260  
Chelonus isidrochaconi[263][DHJPAR0049025][Parastenia retractalis][658[0n]]BOLD:AAC8260  
Chelonus isidrochaconi[264][DHJPAR0049020][Parastenia retractalis][658[0n]]BOLD:AAC8260  
Chelonus isidrochaconi[265][DHJPAR0049034][Parastenia retractalis][658[0n]]BOLD:AAC8260  
Chelonus isidrochaconi[266][DHJPAR0049024][Parastenia retractalis][658[0n]]BOLD:AAC8260  
Chelonus isidrochaconi[267][DHJPAR0049026][Parastenia retractalis][658[0n]]BOLD:AAC8260  
Chelonus isidrochaconi[268][DHJPAR0049000][Parastenia retractalis][658[0n]]BOLD:AAC8260  
Chelonus isidrochaconi[269][DHJPAR0049039][Parastenia retractalis][658[0n]]BOLD:AAC8260  
Chelonus isidrochaconi[270][DHJPAR0049011][Parastenia retractalis][658[0n]]BOLD:AAC8260  
Chelonus isidrochaconi[271][DHJPAR0049021][Parastenia retractalis][658[0n]]BOLD:AAC8260  
Chelonus isidrochaconi[272][DHJPAR0048986][Parastenia retractalis][658[0n]]BOLD:AAC8260  
Chelonus isidrochaconi[273][DHJPAR0049037][Parastenia retractalis][658[0n]]BOLD:AAC8260  
Chelonus isidrochaconi[274][DHJPAR0049023][Parastenia retractalis][658[0n]]BOLD:AAC8260  
Chelonus isidrochaconi[275][DHJPAR0048988][Parastenia retractalis][658[0n]]BOLD:AAC8260  
Chelonus isidrochaconi[276][DHJPAR0048987][Parastenia retractalis][658[0n]]BOLD:AAC8260  
Chelonus isidrochaconi[277][DHJPAR0049009][Parastenia retractalis][658[0n]]BOLD:AAC8260  
Chelonus isidrochaconi[278][DHJPAR0048993][Parastenia retractalis][658[0n]]BOLD:AAC8260  
Chelonus isidrochaconi[279][DHJPAR0048995][Parastenia retractalis][658[0n]]BOLD:AAC8260  
Chelonus isidrochaconi[280][DHJPAR0048989][Parastenia retractalis][658[0n]]BOLD:AAC8260  
Chelonus isidrochaconi[281][DHJPAR0049022][Parastenia retractalis][658[0n]]BOLD:AAC8260  
Chelonus isidrochaconi[282][DHJPAR0049031][Parastenia retractalis][658[0n]]BOLD:AAC8260  
Chelonus isidrochaconi[283][DHJPAR0049029][Parastenia retractalis][658[0n]]BOLD:AAC8260  
Chelonus isidrochaconi[284][DHJPAR0048984][Parastenia retractalis][658[0n]]BOLD:AAC8260  
Chelonus Janzen7002[285][DHJPAR0029071][Hileithia Solis01][609[0n]]BOLD:ACK7002  
Chelonus harryramirezii[286][DHJPAR0020804][Omiodes humeralis][660[0n]]BOLD:AAE2698  
Chelonus harryramirezii[287][DHJPAR0038012][Omiodes humeralis][658[0n]]BOLD:AAE2698  
Chelonus harryramirezii[288][DHJPAR0054938][Omiodes humeralis][658[1n]]BOLD:AAE2698  
Chelonus harryramirezii[289][DHJPAR0051330][Omiodes humeralis][658[0n]]BOLD:AAE2698  
Chelonus harryramirezii[290][DHJPAR0020624][Omiodes humeralis][657[0n]]BOLD:AAE2698  
Chelonus harryramirezii[291][DHJPAR0051326][Omiodes humeralis][658[0n]]BOLD:AAE2698  
Chelonus harryramirezii[292][DHJPAR0051328][Omiodes humeralis][658[0n]]BOLD:AAE2698  
Chelonus harryramirezii[293][DHJPAR0038013][Omiodes humeralis][658[0n]]BOLD:AAE2698  
Chelonus harryramirezii[294][DHJPAR0046938][Omiodes humeralis][658[0n]]BOLD:AAE2698  
Chelonus harryramirezii[295][DHJPAR0038014][Omiodes humeralis][658[0n]]BOLD:AAE2698

Chelonus harriramirezi[293][DHJP0038013]Omiodes humeralis[658[0n]]BOLD:AAE2698  
Chelonus harriramirezi[294][DHJP0046938]Omiodes humeralis[658[0n]]BOLD:AAE2698  
Chelonus harriramirezi[295][DHJP0038014]Omiodes humeralis[658[0n]]BOLD:AAE2698  
Chelonus harriramirezi[296][DHJP0020802]Omiodes humeralis[657[0n]]BOLD:AAE2698  
Chelonus harriramirezi[297][DHJP0054564]Omiodes humeralis[658[0n]]BOLD:AAE2698  
Chelonus harriramirezi[298][DHJP0020623]Omiodes humeralis[653[0n]]BOLD:AAE2698  
Chelonus harriramirezi[299][DHJP0023700]Omiodes humeralis[646[0n]]BOLD:AAE2698  
Chelonus harriramirezi[300][DHJP0051927]Omiodes humeralis[652[2n]]BOLD:AAE2698  
Chelonus harriramirezi[301][DHJP0055229]Omiodes humeralis[658[0n]]BOLD:AAE2698  
Chelonus hartmanguidoi[302][DHJP0054439]Omiodes Janzen05[614[0n]]BOLD:AAD1994  
Chelonus hartmanguidoi[303][DHJP0054571]Omiodes Janzen05[658[0n]]BOLD:AAD1994  
Chelonus hartmanguidoi[304][DHJP0054570]Omiodes Janzen05[658[0n]]BOLD:AAD1994  
Chelonus hartmanguidoi[305][DHJP0056963]Omiodes Janzen05[614[0n]]BOLD:AAD1994  
Chelonus hartmanguidoi[306][DHJP0046801]Omiodes Janzen05[658[0n]]BOLD:AAD1994  
Chelonus hartmanguidoi[307][DHJP0036398]Phostria cyrisalis[658[0n]]BOLD:AAD1994  
Chelonus hartmanguidoi[308][DHJP0035222]spiloBioLep01 BioLep577[658[0n]]BOLD:AAD1994  
Chelonus hartmanguidoi[309][DHJP0042543]Omiodes Janzen05[658[0n]]BOLD:AAD1994  
Chelonus hartmanguidoi[310][DHJP0046947]Omiodes Janzen05[658[0n]]BOLD:AAD1994  
Chelonus hartmanguidoi[311][DHJP0029166]Omiodes Janzen03[657[0n]]BOLD:AAD1994  
Chelonus hartmanguidoi[312][DHJP0029154]Omiodes Janzen03[657[0n]]BOLD:AAD1994  
Chelonus hartmanguidoi[313][DHJP0053677]Omiodes Janzen05[658[0n]]BOLD:AAD1994  
Chelonus hartmanguidoi[314][DHJP0056958]Omiodes Janzen03[658[0n]]BOLD:AAD1994  
Chelonus hartmanguidoi[315][DHJP0053686]Omiodes Janzen05[658[0n]]BOLD:AAD1994  
Chelonus hartmanguidoi[316][DHJP0056968]Omiodes Janzen05[658[0n]]BOLD:AAD1994  
Chelonus hartmanguidoi[317][DHJP0052896]Omiodes Janzen05[658[0n]]BOLD:AAD1994  
Chelonus hartmanguidoi[318][DHJP0035308]Piletosoma thialis[658[0n]]BOLD:AAD1994  
Chelonus hartmanguidoi[319][DHJP0035313]Piletosoma thialis[658[0n]]BOLD:AAD1994  
Chelonus hartmanguidoi[320][DHJP0056969]Omiodes Janzen05[658[0n]]BOLD:AAD1994  
Chelonus hartmanguidoi[321][DHJP0056957]Omiodes Janzen03[658[0n]]BOLD:AAD1994  
Chelonus hartmanguidoi[322][DHJP0035312]Omiodes Janzen05[658[0n]]BOLD:AAD1994  
Chelonus hartmanguidoi[323][DHJP0035307]Piletosoma thialis[658[0n]]BOLD:AAD1994  
Chelonus iangauldi[324][DHJP0037168]Prentesta scyllalisDHJ01[658[0n]]BOLD:AAD4709  
Chelonus iangauldi[325][DHJP0036726]Prentesta scyllalisDHJ01[658[0n]]BOLD:AAD4709  
Chelonus iangauldi[326][DHJP0037160]Prentesta scyllalisDHJ01[633[0n]]BOLD:AAD4709  
Chelonus iangauldi[327][DHJP0037175]Prentesta scyllalisDHJ01[658[0n]]BOLD:AAD4709  
Chelonus iangauldi[328][DHJP0037183]Prentesta scyllalisDHJ01[658[0n]]BOLD:AAD4709  
Chelonus iangauldi[329][DHJP0037169]Prentesta scyllalisDHJ01[658[0n]]BOLD:AAD4709  
Chelonus iangauldi[330][DHJP0037165]Prentesta scyllalisDHJ01[658[0n]]BOLD:AAD4709  
Chelonus iangauldi[331][DHJP0040017]Prentesta scyllalisDHJ01[658[0n]]BOLD:AAD4709  
Chelonus gustavogutierrezii[332][DHJP0029122]Omiodes cunicularis[274[0n]]  
Chelonus gustavogutierrezii[333][DHJP0029121]Omiodes cunicularis[272[0n]]  
Chelonus gustavogutierrezii[334][DHJP0029112]Omiodes cunicularis[507[2n]]BOLD:AAA6603  
Chelonus gustavogutierrezii[335][DHJP0029098]Omiodes cunicularis[266[0n]]  
Chelonus gustavogutierrezii[336][DHJP0029099]Omiodes cunicularis[621[0n]]BOLD:AAA6603  
Chelonus gustavogutierrezii[337][DHJP0055601]Omiodes cunicularis[661[0n]]BOLD:AAA6603  
Chelonus gustavogutierrezii[338][DHJP0055822]Omiodes cunicularis[658[0n]]BOLD:AAA6603  
Chelonus gustavogutierrezii[339][DHJP0064013]Omiodes cunicularis[626[0n]]BOLD:AAA6603  
Chelonus gustavogutierrezii[340][DHJP0063961]Omiodes cunicularis[622[0n]]BOLD:AAA6603  
Chelonus gustavogutierrezii[341][DHJP0062691]Omiodes cunicularis[614[0n]]BOLD:AAA6603  
Chelonus gustavogutierrezii[342][DHJP0062712]Omiodes cunicularis[614[0n]]BOLD:AAA6603  
Chelonus gustavogutierrezii[343][DHJP0049036]Omiodes Janzen07[658[0n]]BOLD:AAA6603  
Chelonus gustavogutierrezii[344][DHJP0029151]Omiodes cunicularis[657[0n]]BOLD:AAA6603  
Chelonus gustavogutierrezii[345][DHJP0049017]Omiodes Janzen07[658[0n]]BOLD:AAA6603  
Chelonus gustavogutierrezii[346][DHJP0038011]Omiodes cunicularis[658[0n]]BOLD:AAA6603  
Chelonus gustavogutierrezii[347][DHJP0037863]Omiodes cunicularis[658[0n]]BOLD:AAA6603  
Chelonus gustavogutierrezii[348][DHJP0029165]Omiodes cunicularis[657[0n]]BOLD:AAA6603  
Chelonus gustavogutierrezii[349][DHJP0038008]Omiodes cunicularis[658[0n]]BOLD:AAA6603  
Chelonus gustavogutierrezii[350][DHJP0055823]Omiodes cunicularis[658[0n]]BOLD:AAA6603  
Chelonus gustavogutierrezii[351][DHJP0062711]Omiodes cunicularis[658[0n]]BOLD:AAA6603  
Chelonus gustavogutierrezii[352][DHJP0037985]Pyralidae 09-SRNP-71481[658[0n]]BOLD:AAA6603  
Chelonus gustavogutierrezii[353][DHJP0038005]Omiodes cunicularis[658[0n]]BOLD:AAA6603  
Chelonus gustavogutierrezii[354][DHJP0029144]Omiodes cunicularis[657[0n]]BOLD:AAA6603  
Chelonus gustavogutierrezii[355][DHJP0038001]Omiodes cunicularis[658[0n]]BOLD:AAA6603  
Chelonus gustavogutierrezii[356][DHJP0037983]Omiodes cunicularis[658[0n]]BOLD:AAA6603  
Chelonus gustavogutierrezii[357][DHJP0038000]Omiodes cunicularis[658[0n]]BOLD:AAA6603  
Chelonus gustavogutierrezii[358][DHJP0037976]Omiodes cunicularis[658[0n]]BOLD:AAA6603  
Chelonus gustavogutierrezii[359][DHJP0029138]Omiodes cunicularis[657[0n]]BOLD:AAA6603  
Chelonus gustavogutierrezii[360][DHJP0062703]Omiodes cunicularis[658[0n]]BOLD:AAA6603  
Chelonus gustavogutierrezii[361][DHJP0029139]Omiodes cunicularis[657[0n]]BOLD:AAA6603  
Chelonus gustavogutierrezii[362][DHJP0029149]Omiodes cunicularis[657[0n]]BOLD:AAA6603  
Chelonus gustavogutierrezii[363][DHJP0029164]Omiodes cunicularis[657[0n]]BOLD:AAA6603  
Chelonus gustavogutierrezii[364][DHJP0062706]Omiodes cunicularis[658[0n]]BOLD:AAA6603  
Chelonus gustavogutierrezii[365][DHJP0038009]Omiodes cunicularis[658[0n]]BOLD:AAA6603  
Chelonus gustavogutierrezii[366][DHJP0055821]Omiodes cunicularis[658[0n]]BOLD:AAA6603  
Chelonus gustavogutierrezii[367][DHJP0062700]Omiodes cunicularis[658[0n]]BOLD:AAA6603  
Chelonus gustavogutierrezii[368][DHJP0029159]Omiodes cunicularis[657[0n]]BOLD:AAA6603  
Chelonus gustavogutierrezii[369][DHJP0029156]Omiodes cunicularis[657[0n]]BOLD:AAA6603  
Chelonus gustavogutierrezii[370][DHJP0054568]Omiodes cunicularis[658[0n]]BOLD:AAA6603  
Chelonus gustavogutierrezii[371][DHJP0055083]Omiodes cunicularis[658[0n]]BOLD:AAA6603  
Chelonus gustavogutierrezii[372][DHJP0037980]Omiodes cunicularis[658[0n]]BOLD:AAA6603  
Chelonus gustavogutierrezii[373][DHJP0029143]Omiodes cunicularis[657[0n]]BOLD:AAA6603  
Chelonus gustavogutierrezii[374][DHJP0062705]Omiodes cunicularis[658[0n]]BOLD:AAA6603  
Chelonus gustavogutierrezii[375][DHJP0048985]Omiodes Janzen07[658[0n]]BOLD:AAA6603  
Chelonus gustavogutierrezii[376][DHJP0054569]Omiodes cunicularis[658[0n]]BOLD:AAA6603  
Chelonus gustavogutierrezii[377][DHJP0062696]Omiodes cunicularis[658[0n]]BOLD:AAA6603  
Chelonus gustavogutierrezii[378][DHJP0049010]Omiodes Janzen07[658[0n]]BOLD:AAA6603  
Chelonus gustavogutierrezii[379][DHJP0037991]Omiodes cunicularis[658[0n]]BOLD:AAA6603  
Chelonus gustavogutierrezii[380][DHJP0029171]Omiodes cunicularis[657[0n]]BOLD:AAA6603  
Chelonus gustavogutierrezii[381][DHJP0062699]Omiodes cunicularis[658[0n]]BOLD:AAA6603  
Chelonus gustavogutierrezii[382][DHJP0029155]Omiodes cunicularis[657[0n]]BOLD:AAA6603  
Chelonus gustavogutierrezii[383][DHJP0055368]Omiodes cunicularis[658[0n]]BOLD:AAA6603  
Chelonus gustavogutierrezii[384][DHJP0062692]Omiodes cunicularis[658[0n]]BOLD:AAA6603  
Chelonus gustavogutierrezii[385][DHJP0037999]Omiodes cunicularis[658[0n]]BOLD:AAA6603  
Chelonus gustavogutierrezii[386][DHJP0029153]Omiodes cunicularis[657[0n]]BOLD:AAA6603  
Chelonus gustavogutierrezii[387][DHJP0037997]Omiodes cunicularis[658[0n]]BOLD:AAA6603  
Chelonus gustavogutierrezii[388][DHJP0049013]Omiodes Janzen07[658[0n]]BOLD:AAA6603  
Chelonus gustavogutierrezii[389][DHJP0038002]Omiodes cunicularis[658[0n]]BOLD:AAA6603  
Chelonus gustavogutierrezii[390][DHJP0055367]Omiodes cunicularis[658[0n]]BOLD:AAA6603  
Chelonus gustavogutierrezii[391][DHJP0029169]Omiodes cunicularis[657[0n]]BOLD:AAA6603  
Chelonus gustavogutierrezii[392][DHJP0049014]Omiodes Janzen07[658[0n]]BOLD:AAA6603  
Chelonus gustavogutierrezii[393][DHJP0029172]Omiodes cunicularis[657[0n]]BOLD:AAA6603



Chelonus michellevanderbankae[489]|DHJPAR0055415|Anacrusis nephrodes|583|5n|BOLD: AAT8838  
Chelonus michellevanderbankae[490]|DHJPAR0040021|Anacrusis nephrodes|421|0n|BOLD: AAT8838  
Chelonus michellevanderbankae[491]|DHJPAR0040018|Anacrusis nephrodes|421|0n|BOLD: AAT8838  
Chelonus michellevanderbankae[492]|DHJPAR0040406|Anacrusis nephrodes|645|4n|BOLD: AAT8838  
Chelonus michellevanderbankae[493]|DHJPAR0029135|Anacrusis nephrodes|426|0n|BOLD: AAT8838  
Chelonus michellevanderbankae[494]|DHJPAR0047069|Anacrusis nephrodes|612|2n|BOLD: AAT8838  
Chelonus michellevanderbankae[495]|DHJPAR0038977|Anacrusis nephrodes|613|0n|BOLD: AAT8838  
Chelonus michellevanderbankae[496]|DHJPAR0050964|Anacrusis nephrodes|629|0n|BOLD: AAT8838  
Chelonus michellevanderbankae[497]|DHJPAR0049118|Anacrusis nephrodes|658|0n|BOLD: AAT8838  
Chelonus michellevanderbankae[498]|DHJPAR0039447|Anacrusis nephrodes|620|1n|BOLD: AAT8838  
Chelonus nataliaivanovae[499]|DHJPAR0045406|Anacrusis nephrodes|658|2n|BOLD: AAF2632  
Chelonus nataliaivanovae[500]|DHJPAR0035559|Anacrusis nephrodes|658|0n|BOLD: AAF2632  
Chelonus nataliaivanovae[501]|DHJPAR0035415|Omiodes humeralis|558|0n|BOLD: AAF2632  
Chelonus nataliaivanovae[502]|DHJPAR0049124|Amorbia productana|658|0n|BOLD: AAF2632  
Chelonus nataliaivanovae[503]|DHJPAR0040020|Antaeotricha ianthina|EPR01|658|0n|BOLD: AAF2632  
Chelonus nataliaivanovae[504]|DHJPAR0053679|Megalota vulgaris|658|0n|BOLD: AAF2632  
Chelonus nataliaivanovae[505]|DHJPAR0056713|Antaeotricha spurca|658|0n|BOLD: AAF2632  
Chelonus nataliaivanovae[506]|DHJPAR0029133|Anacrusis nephrodes|657|0n|BOLD: AAF2632  
Chelonus nataliaivanovae[507]|DHJPAR0042960|Antaeotricha Janzen|140|DHJ03|658|0n|BOLD: AAF2632  
Chelonus nataliaivanovae[508]|DHJPAR0034268|Spilomela pantheralis|633|0n|BOLD: AAF2632  
Chelonus nataliaivanovae[509]|DHJPAR0039111|Amorbia revolutana|658|0n|BOLD: AAF2632  
Chelonus nataliaivanovae[510]|DHJPAR0052897|Megalota crassana|658|0n|BOLD: AAF2632  
Chelonus nataliaivanovae[511]|DHJPAR0049786|Antaeotricha BioLep|38|658|0n|BOLD: AAF2632  
Chelonus nataliaivanovae[512]|DHJPAR0040019|Anacrusis nephrodes|658|0n|BOLD: AAF2632  
Chelonus nataliaivanovae[513]|DHJPAR0055461|Strepsicrates Brown|37|658|0n|BOLD: AAF2632  
Chelonus nataliaivanovae[514]|DHJPAR0035316|Antaeotricha Janzen|401|658|0n|BOLD: AAF2632  
Chelonus paulgoldsteini[515]|DHJPAR0042855|elachBioLep01 BioLep754|598|0n|BOLD: AAE9140  
Chelonus paulgoldsteini[516]|DHJPAR0048102|elachBioLep01 BioLep754|658|0n|BOLD: AAE9140  
Chelonus paulgoldsteini[517]|DHJPAR0051928|elachBioLep01 BioLep754|658|0n|BOLD: AAE9140  
Chelonus paulgoldsteini[518]|DHJPAR0051921|elachBioLep01 BioLep754|658|0n|BOLD: AAE9140  
Chelonus paulgoldsteini[519]|DHJPAR0035527|Stenoma BioLep86|633|0n|BOLD: AAE9140  
Chelonus paulgoldsteini[520]|DHJPAR0042851|elachBioLep01 BioLep754|633|0n|BOLD: AAE9140  
Chelonus paulgoldsteini[521]|DHJPAR0039120|elachBioLep01 BioLep754|629|0n|BOLD: AAE9140  
Chelonus paulgoldsteini[522]|DHJPAR0046940|elachBioLep01 BioLep754|606|0n|BOLD: AAE9140  
Chelonus paulgoldsteini[523]|DHJPAR0056954|elachBioLep01 BioLep754|608|0n|BOLD: AAE9140  
Chelonus paulgoldsteini[524]|DHJPAR0048980|elachBioLep01 BioLep754|608|0n|BOLD: AAE9140  
Chelonus paulgoldsteini[525]|DHJPAR0035526|Stenoma BioLep86|622|0n|BOLD: AAE9140  
Chelonus paulgoldsteini[526]|DHJPAR0051923|elachBioLep01 BioLep754|633|0n|BOLD: AAE9140  
Chelonus paulgoldsteini[527]|DHJPAR0056976|elachBioLep01 BioLep754|632|0n|BOLD: AAE9140  
Chelonus paulgoldsteini[528]|DHJPAR0035528|Stenoma BioLep86|632|0n|BOLD: AAE9140  
Chelonus pamelacastilloae[529]|DHJPAR0045401|Antaeotricha BioLep91|658|0n|BOLD: AAK1568  
Chelonus paulhansonii[530]|DHJPAR0061491|Antaeotricha Janzen|204|658|0n|BOLD: ACB1254  
Chelonus paulhansonii[531]|DHJPAR0051343|Antaeotricha Janzen|204|658|0n|BOLD: ACB1254  
Chelonus paulhansonii[532]|DHJPAR0048978|Antaeotricha Janzen|204|658|0n|BOLD: ACB1254  
Chelonus paulhansonii[533]|DHJPAR0049326|Antaeotricha Janzen|204|658|0n|BOLD: ACB1254  
Chelonus petronariosae[534]|DHJPAR0048976|Antaeotricha Janzen|146|658|0n|BOLD: ACB1255  
Chelonus randallgarciai[535]|DHJPAR0064504|Antaeotricha Janzen|239|658|0n|BOLD: ADR1783  
Chelonus randallgarciai[536]|DHJPAR0062693|Antaeotricha Janzen|146|618|0n|BOLD: ADR1783  
Chelonus ramyamanjunathae[537]|DHJPAR0045410|Antaeotricha Janzen|321|658|2n|BOLD: ABA9309  
Chelonus ramyamanjunathae[538]|DHJPAR0045412|Antaeotricha Janzen|321|658|0n|BOLD: ABA9309  
Chelonus ramyamanjunathae[539]|DHJPAR0055369|Antaeotricha Janzen|146|658|0n|BOLD: ABA9309  
Chelonus ramyamanjunathae[540]|DHJPAR0048975|Antaeotricha Janzen|321|658|0n|BOLD: ABA9309  
Chelonus ramyamanjunathae[541]|DHJPAR0048971|Antaeotricha Janzen|321|658|0n|BOLD: ABA9309  
Chelonus ramyamanjunathae[542]|DHJPAR0045411|Antaeotricha Janzen|321|658|0n|BOLD: ABA9309  
Chelonus ramyamanjunathae[543]|DHJPAR0045413|Antaeotricha Janzen|321|658|1n|BOLD: ABA9309  
Chelonus ramyamanjunathae[544]|DHJPAR0055366|Antaeotricha Janzen|146|658|0n|BOLD: ABA9309  
Chelonus ramyamanjunathae[545]|DHJPAR0064503|Antaeotricha Janzen|239|658|0n|BOLD: ABA9309  
Chelonus ramyamanjunathae[546]|DHJPAR0040016|Antaeotricha Janzen|126|658|0n|BOLD: ABA9309  
Chelonus paulhebertii[547]|DHJPAR0048105|Stenoma BioLep86|658|0n|BOLD: AAN2554  
Chelonus paulhebertii[548]|DHJPAR0042863|elachBioLep01 BioLep754|658|0n|BOLD: AAN2554  
Chelonus paulhebertii[549]|DHJPAR0039503|elachBioLep01 BioLep55|658|0n|BOLD: AAN2554  
Chelonus paulhebertii[550]|DHJPAR0042854|Antaeotricha Janzen|233|658|0n|BOLD: AAN2554  
Chelonus paulhebertii[551]|DHJPAR0042850|elachBioLep01 BioLep754|658|0n|BOLD: AAN2554  
Chelonus paulhebertii[552]|DHJPAR0048972|Antaeotricha Janzen|233|627|0n|BOLD: AAN2554  
Chelonus paulhebertii[553]|DHJPAR0042861|Antaeotricha Janzen|233|658|0n|BOLD: AAN2554  
Chelonus rebeccakittela[554]|DHJPAR0048982|Antaeotricha Janzen|224|604|0n|BOLD: ACB1121  
Chelonus robertofernandezii[555]|DHJPAR0052883|Antaeotricha Janzen|110|658|0n|BOLD: ACI5332  
Chelonus robertospinozai[556]|DHJPAR0029177|Ategumia lotanalis|657|0n|BOLD: AAD4678  
Chelonus robertospinozai[557]|DHJPAR0029174|Ategumia lotanalis|657|0n|BOLD: AAD4678  
Chelonus robertospinozai[558]|DHJPAR0064008|elachJanzen01 Janzen211|628|0n|BOLD: AAD4678  
Chelonus robertospinozai[559]|DHJPAR0046939|elachJanzen01 Janzen211|658|0n|BOLD: AAD4678  
Chelonus robertospinozai[560]|DHJPAR0064506|elachJanzen01 Janzen211|658|0n|BOLD: AAD4678  
Chelonus rocioeverriai[561]|DHJPAR0048970|Antaeotricha Janzen|146|658|0n|BOLD: ACB1122  
Chelonus rodrigogamezi[562]|DHJPAR0042097|Antaeotricha Janzen|88|421|0n|BOLD: AAJ0362  
Chelonus rodrigogamezi[563]|DHJPAR0056001|Antaeotricha Janzen|88|670|0n|BOLD: AAJ0362  
Chelonus rodrigogamezi[564]|DHJPAR0040360|Antaeotricha Janzen|88|627|0n|BOLD: AAJ0362  
Chelonus rodrigogamezi[565]|DHJPAR0055383|Antaeotricha Janzen|88|658|0n|BOLD: AAJ0362  
Chelonus rodrigogamezi[566]|DHJPAR0055375|Antaeotricha Janzen|88|658|0n|BOLD: AAJ0362  
Chelonus rodrigogamezi[567]|DHJPAR0055385|Antaeotricha Janzen|88|658|0n|BOLD: AAJ0362  
Chelonus rodrigogamezi[568]|DHJPAR0055359|Antaeotricha Janzen|88|658|0n|BOLD: AAJ0362  
Chelonus rodrigogamezi[569]|DHJPAR0064029|Antaeotricha Janzen|88|636|0n|BOLD: AAJ0362  
Chelonus rodrigogamezi[570]|DHJPAR0055374|Antaeotricha Janzen|88|658|0n|BOLD: AAJ0362  
Chelonus rodrigogamezi[571]|DHJPAR0050074|Antaeotricha Janzen|88|658|0n|BOLD: AAJ0362  
Chelonus rodrigogamezi[572]|DHJPAR0055378|Antaeotricha Janzen|88|624|0n|BOLD: AAJ0362  
Chelonus rodrigogamezi[573]|DHJPAR0056951|Antaeotricha Janzen|88|661|0n|BOLD: AAJ0362  
Chelonus rodrigogamezi[574]|DHJPAR0056953|Antaeotricha Janzen|88|661|0n|BOLD: AAJ0362  
Chelonus rodrigogamezi[575]|DHJPAR0054565|Antaeotricha Janzen|88|658|0n|BOLD: AAJ0362  
Chelonus rodrigogamezi[576]|DHJPAR0052884|Antaeotricha Janzen|88|658|0n|BOLD: AAJ0362  
Chelonus rodrigogamezi[577]|DHJPAR0056971|Antaeotricha Janzen|88|658|0n|BOLD: AAJ0362  
Chelonus rodrigogamezi[578]|DHJPAR0056956|Antaeotricha Janzen|88|661|0n|BOLD: AAJ0362  
Chelonus rodrigogamezi[579]|DHJPAR0048099|Antaeotricha Janzen|88|658|0n|BOLD: AAJ0362  
Chelonus rodrigogamezi[580]|DHJPAR0040363|Antaeotricha Janzen|88|658|0n|BOLD: AAJ0362  
Chelonus rodrigogamezi[581]|DHJPAR0040365|Antaeotricha Janzen|88|658|0n|BOLD: AAJ0362  
Chelonus rodrigogamezi[582]|DHJPAR0055361|Antaeotricha Janzen|88|658|0n|BOLD: AAJ0362  
Chelonus rodrigogamezi[583]|DHJPAR0055358|Antaeotricha Janzen|88|658|0n|BOLD: AAJ0362  
Chelonus rodrigogamezi[584]|DHJPAR0055394|Antaeotricha Janzen|88|658|0n|BOLD: AAJ0362  
Chelonus rodrigogamezi[585]|DHJPAR0040362|Antaeotricha Janzen|88|618|0n|BOLD: AAJ0362  
Chelonus rodrigogamezi[586]|DHJPAR0046937|Antaeotricha Janzen|88|658|0n|BOLD: AAJ0362  
Chelonus rodrigogamezi[587]|DHJPAR0056349|Antaeotricha Janzen|88|661|0n|BOLD: AAJ0362  
Chelonus rodrigogamezi[588]|DHJPAR0056352|Antaeotricha Janzen|88|624|0n|BOLD: AAJ0362  
Chelonus rodrigogamezi[589]|DHJPAR0029168|Antaeotricha Janzen|88|657|0n|BOLD: AAJ0362

Chelonus rodrigogamezi[587]DHJP0005349|Antaeotricha Janzen88|601[0n]|BOLD:AAJ0362  
 Chelonus rodrigogamezi[588]DHJP00056352|Antaeotricha Janzen88|624[0n]|BOLD:AAJ0362  
 Chelonus rodrigogamezi[589]DHJP00029168|Antaeotricha Janzen88|657[0n]|BOLD:AAJ0362  
 Chelonus rodrigogamezi[590]DHJP00055230|Antaeotricha Janzen88|658[0n]|BOLD:AAJ0362  
 Chelonus rodrigogamezi[591]DHJP00040361|Antaeotricha Janzen88|658[0n]|BOLD:AAJ0362  
 Chelonus rodrigogamezi[592]DHJP00062575|Antaeotricha Janzen88|658[0n]|BOLD:AAJ0362  
 Chelonus rodrigogamezi[593]DHJP00052885|Antaeotricha Janzen88|658[0n]|BOLD:AAJ0362  
 Chelonus rodrigogamezi[594]DHJP00063428|Antaeotricha Janzen88|658[0n]|BOLD:AAJ0362  
 Chelonus rodrigogamezi[595]DHJP00052888|Antaeotricha Janzen88|658[0n]|BOLD:AAJ0362  
 Chelonus rodrigogamezi[596]DHJP00056959|Antaeotricha Janzen88|658[0n]|BOLD:AAJ0362  
 Chelonus rodrigogamezi[597]DHJP00052893|Antaeotricha Janzen88|658[0n]|BOLD:AAJ0362  
 Chelonus rodrigogamezi[598]DHJP00055993|Antaeotricha Janzen88|670[0n]|BOLD:AAJ0362  
 Chelonus rodrigogamezi[599]DHJP00055362|Antaeotricha Janzen88|658[0n]|BOLD:AAJ0362  
 Chelonus rodrigogamezi[600]DHJP00051329|Antaeotricha Janzen88|658[0n]|BOLD:AAJ0362  
 Chelonus rodrigogamezi[601]DHJP00052892|Antaeotricha Janzen88|658[0n]|BOLD:AAJ0362  
 Chelonus rodrigogamezi[602]DHJP00055994|Antaeotricha Janzen88|670[0n]|BOLD:AAJ0362  
 Chelonus rodrigogamezi[603]DHJP00055999|Antaeotricha Janzen88|670[0n]|BOLD:AAJ0362  
 Chelonus rodrigogamezi[604]DHJP00040370|Antaeotricha Janzen88|658[0n]|BOLD:AAJ0362  
 Chelonus rodrigogamezi[605]DHJP00052895|Antaeotricha Janzen88|658[0n]|BOLD:AAJ0362  
 Chelonus rodrigogamezi[606]DHJP00040359|Antaeotricha Janzen88|658[0n]|BOLD:AAJ0362  
 Chelonus rodrigogamezi[607]DHJP00052880|Antaeotricha Janzen88|658[0n]|BOLD:AAJ0362  
 Chelonus rodrigogamezi[608]DHJP00048098|Antaeotricha Janzen88|658[0n]|BOLD:AAJ0362  
 Chelonus rodrigogamezi[609]DHJP00050121|Antaeotricha Janzen88|658[0n]|BOLD:AAJ0362  
 Chelonus rodrigogamezi[610]DHJP00051341|Antaeotricha Janzen88|658[0n]|BOLD:AAJ0362  
 Chelonus rodrigogamezi[611]DHJP00051335|Antaeotricha Janzen88|658[0n]|BOLD:AAJ0362  
 Chelonus rodrigogamezi[612]DHJP00053675|Antaeotricha Janzen88|658[0n]|BOLD:AAJ0362  
 Chelonus rodrigogamezi[613]DHJP00052894|Antaeotricha Janzen88|613[0n]|BOLD:AAJ0362  
 Chelonus rodrigogamezi[614]DHJP00053680|Antaeotricha Janzen88|605[0n]|BOLD:AAJ0362  
 Chelonus rodrigogamezi[615]DHJP00054558|Antaeotricha Janzen88|658[0n]|BOLD:AAJ0362  
 Chelonus rodrigogamezi[616]DHJP00054562|Antaeotricha Janzen88|658[0n]|BOLD:AAJ0362  
 Chelonus rodrigogamezi[617]DHJP00054554|Antaeotricha Janzen88|658[0n]|BOLD:AAJ0362  
 Chelonus rodrigogamezi[618]DHJP00055401|Antaeotricha Janzen88|658[0n]|BOLD:AAJ0362  
 Chelonus rodrigogamezi[619]DHJP00062574|Antaeotricha Janzen88|658[0n]|BOLD:AAJ0362  
 Chelonus ronaldzunigai[620]DHJP00037167|Antaeotricha Janzen134|624[0n]|BOLD:AAK1016  
 Chelonus rosibelizondae[621]DHJP00051334|Antaeotricha renselariana|658[1n]|BOLD:AAM1446  
 Chelonus rosibelizondae[622]DHJP00038004|Antaeotricha Janzen146|658[0n]|BOLD:AAM1446  
 Chelonus rostermoragai[623]DHJP00056000|Antaeotricha stigmatiasDHJ01|670[0n]|BOLD:ACJ3551  
 Chelonus rostermoragai[624]DHJP00053673|Antaeotricha stigmatiasDHJ01|657[0n]|BOLD:ACJ3551  
 Chelonus rostermoragai[625]DHJP00053685|Antaeotricha stigmatiasDHJ01|657[0n]|BOLD:ACJ3551  
 Chelonus rostermoragai[626]DHJP00051926|Antaeotricha stigmatiasDHJ01|658[0n]|BOLD:ACJ3551  
 Chelonus rostermoragai[627]DHJP00051922|Antaeotricha stigmatiasDHJ01|658[0n]|BOLD:ACJ3551  
 Chelonus rostermoragai[628]DHJP00051925|Antaeotricha stigmatiasDHJ01|658[0n]|BOLD:ACJ3551  
 Chelonus ruthfrancoae[629]DHJP00056354|Antaeotricha BioLep46|661[0n]|BOLD:AAW4589  
 Chelonus ruthfrancoae[630]DHJP00051344|Antaeotricha similisEPR03|658[0n]|BOLD:AAW4589  
 Chelonus ruthfrancoae[631]DHJP00051094|Antaeotricha similisEPR02|658[0n]|BOLD:AAW4589  
 Chelonus ruthfrancoae[632]DHJP00050136|Cerconota Janzen82|658[0n]|BOLD:AAW4589  
 Chelonus ruthfrancoae[633]DHJP00055363|Antaeotricha Janzen13|658[0n]|BOLD:AAW4589  
 Chelonus ruthfrancoae[634]DHJP00056353|Antaeotricha BioLep46|634[0n]|BOLD:AAW4589  
 Chelonus ruthfrancoae[635]DHJP00056965|Antaeotricha BioLep46|632[1n]|BOLD:AAW4589  
 Chelonus ruthfrancoae[636]DHJP00056962|Antaeotricha Janzen31|658[0n]|BOLD:AAW4589  
 Chelonus ruthfrancoae[637]DHJP00042089|Stenoma Janzen09|658[0n]|BOLD:AAW4589  
 Chelonus ruthfrancoae[638]DHJP00042091|Stenoma Janzen09|658[0n]|BOLD:AAW4589  
 Chelonus ruthfrancoae[639]DHJP00056950|Antaeotricha BioLep46|661[0n]|BOLD:AAW4589  
 Chelonus ruthfrancoae[640]DHJP00055399|Antaeotricha Janzen290|658[0n]|BOLD:AAW4589  
 Chelonus scottmilleri[641]DHJP00061492|Antaeotricha radicalisEPR03|658[0n]|BOLD:ABY5286  
 Chelonus scottmilleri[642]DHJP00051345|Antaeotricha radicalisEPR03|658[0n]|BOLD:ABY5286  
 Chelonus scottmilleri[643]DHJP00055384|Antaeotricha Janzen204|658[0n]|BOLD:ABY5286  
 Chelonus scottmilleri[644]DHJP00051325|Antaeotricha Janzen04|658[0n]|BOLD:ABY5286  
 Chelonus scottmilleri[645]DHJP00040369|Antaeotricha radicalisEPR03|658[0n]|BOLD:ABY5286  
 Chelonus scottmilleri[646]DHJP00055388|Antaeotricha radicalisEPR03|658[0n]|BOLD:ABY5286  
 Chelonus scottmilleri[647]DHJP00051339|Antaeotricha radicalisEPR03|658[0n]|BOLD:ABY5286  
 Chelonus scottmilleri[648]DHJP00048096|Antaeotricha radicalisEPR02|658[0n]|BOLD:ABY5286  
 Chelonus scottmilleri[649]DHJP00048095|Antaeotricha radicalisEPR02|658[0n]|BOLD:ABY5286  
 Chelonus scottmilleri[650]DHJP00064505|elachJanzen01 Janzen211|658[0n]|BOLD:ABY5286  
 Chelonus scottmilleri[651]DHJP00055389|Antaeotricha radicalisEPR03|658[0n]|BOLD:ABY5286  
 Chelonus scottmilleri[652]DHJP00035310|Antaeotricha Janzen04|658[0n]|BOLD:ABY5286  
 Chelonus scottmilleri[653]DHJP00053670|Antaeotricha marmorea|657[0n]|BOLD:ABY5286  
 Chelonus scottmilleri[654]DHJP00049934|elachJanzen01 Janzen131|326[0n]  
 Chelonus scottmilleri[655]DHJP00039122|Antaeotricha marmorea|632[0n]|BOLD:ABY5286  
 Chelonus scottmilleri[656]DHJP00045285|Antaeotricha radicalisEPR03|658[2n]|BOLD:ABY5286  
 Chelonus scottshawi[657]DHJP00062573|Antaeotricha Janzen146|658[0n]|BOLD:ABX5499  
 Chelonus scottshawi[658]DHJP00055380|Antaeotricha Janzen146|658[0n]|BOLD:ABX5499  
 Chelonus scottshawi[659]DHJP00037992|Antaeotricha renselariana|658[0n]|BOLD:ABX5499  
 Chelonus scottshawi[660]DHJP00037988|Antaeotricha Janzen146|658[0n]|BOLD:ABX5499  
 Chelonus scottshawi[661]DHJP00055395|Antaeotricha Janzen146|658[0n]|BOLD:ABX5499  
 Chelonus scottshawi[662]DHJP00051924|Antaeotricha Janzen146|658[2n]|BOLD:ABX5499  
 Chelonus scottshawi[663]DHJP00055392|Antaeotricha Janzen146|658[0n]|BOLD:ABX5499  
 Chelonus scottshawi[664]DHJP00037995|Antaeotricha renselariana|658[0n]|BOLD:ABX5499  
 Chelonus scottshawi[665]DHJP00052182|Antaeotricha Janzen49|658[0n]|BOLD:ABX5499  
 Chelonus scottshawi[666]DHJP00052185|Antaeotricha Janzen49|658[0n]|BOLD:ABX5499  
 Chelonus scottshawi[667]DHJP00042853|Antaeotricha Janzen146|658[0n]|BOLD:ABX5499  
 Chelonus scottshawi[668]DHJP00052187|Antaeotricha Janzen49|658[0n]|BOLD:ABX5499  
 Chelonus scottshawi[669]DHJP00062697|Antaeotricha Janzen40|621[0n]|BOLD:ABX5499  
 Chelonus scottshawi[670]DHJP00052280|Antaeotricha Janzen24|658[0n]|BOLD:ABX5499  
 Chelonus scottshawi[671]DHJP00052183|Antaeotricha Janzen24|658[0n]|BOLD:ABX5499  
 Chelonus scottshawi[672]DHJP00052186|Antaeotricha Janzen24|658[0n]|BOLD:ABX5499  
 Chelonus scottshawi[673]DHJP00049018|Antaeotricha Janzen24|658[0n]|BOLD:ABX5499  
 Chelonus scottshawi[674]DHJP00055372|Antaeotricha Janzen24|658[0n]|BOLD:ABX5499  
 Chelonus scottshawi[675]DHJP00055379|Antaeotricha Janzen24|658[0n]|BOLD:ABX5499  
 Chelonus scottshawi[676]DHJP00055393|Antaeotricha Janzen24|658[0n]|BOLD:ABX5499  
 Chelonus scottshawi[677]DHJP00056955|Antaeotricha Janzen24|661[0n]|BOLD:ABX5499  
 Chelonus scottshawi[678]DHJP00036384|Antaeotricha Janzen24|658[0n]|BOLD:ABX5499  
 Chelonus scottshawi[679]DHJP00055365|Antaeotricha Janzen24|658[0n]|BOLD:ABX5499  
 Chelonus scottshawi[680]DHJP00055386|Antaeotricha Janzen24|658[0n]|BOLD:ABX5499  
 Chelonus scottshawi[681]DHJP00049007|Antaeotricha Janzen24|658[0n]|BOLD:ABX5499  
 Chelonus scottshawi[682]DHJP00055991|Antaeotricha Janzen24|670[0n]|BOLD:ABX5499  
 Chelonus scottshawi[683]DHJP00048981|Antaeotricha Janzen24|658[0n]|BOLD:ABX5499  
 Chelonus scottshawi[684]DHJP00055391|Antaeotricha Janzen24|658[0n]|BOLD:ABX5499  
 Chelonus scottshawi[685]DHJP00055396|Antaeotricha Janzen24|658[0n]|BOLD:ABX5499  
 Chelonus scottshawi[686]DHJP00036386|Antaeotricha Janzen24|658[0n]|BOLD:ABX5499  
 Chelonus scottshawi[687]DHJP00055387|Antaeotricha Janzen24|658[0n]|BOLD:ABX5499



Chelonius scottshawi[665]DHJP0003390|Antaeotricha Janzen24|658[0n]|BOLD:ABX5499  
 Chelonius scottshawi[686]DHJP00036386|Antaeotricha Janzen24|658[0n]|BOLD:ABX5499  
 Chelonius scottshawi[687]DHJP00055387|Antaeotricha Janzen24|658[0n]|BOLD:ABX5499  
 Chelonius scottshawi[688]DHJP00048979|Antaeotricha Janzen24|658[0n]|BOLD:ABX5499  
 Chelonius scottshawi[689]DHJP00036403|Antaeotricha Janzen24|658[0n]|BOLD:ABX5499  
 Chelonius scottshawi[690]DHJP00054573|Antaeotricha Janzen24|658[0n]|BOLD:ABX5499  
 Chelonius scottshawi[691]DHJP00036393|Antaeotricha Janzen24|658[0n]|BOLD:ABX5499  
 Chelonius scottshawi[692]DHJP00039505|Antaeotricha Janzen24|658[0n]|BOLD:ABX5499  
 Chelonius scottshawi[693]DHJP00036387|Antaeotricha Janzen24|658[0n]|BOLD:ABX5499  
 Chelonius scottshawi[694]DHJP00055377|Antaeotricha Janzen24|658[0n]|BOLD:ABX5499  
 Chelonius scottshawi[695]DHJP00036382|Antaeotricha Janzen24|636[0n]|BOLD:ABX5499  
 Chelonius scottshawi[696]DHJP00036381|Antaeotricha Janzen24|636[0n]|BOLD:ABX5499  
 Chelonius scottshawi[697]DHJP00036378|Antaeotricha Janzen24|295[0n]  
 Chelonius scottshawi[698]DHJP00036394|Antaeotricha Janzen24|300[0n]  
 Chelonius scottshawi[699]DHJP00036389|Antaeotricha Janzen24|573[0n]|BOLD:ABX5499  
 Chelonius scottshawi[700]DHJP00055360|Antaeotricha Janzen24|500[2n]|BOLD:ABX5499  
 Chelonius scottshawi[701]DHJP00036395|Antaeotricha Janzen24|644[0n]|BOLD:ABX5499  
 Chelonius scottshawi[702]DHJP00056948|Antaeotricha Janzen24|507[2n]  
 Chelonius scottshawi[703]DHJP00036383|Antaeotricha Janzen24|632[0n]|BOLD:ABX5499  
 Chelonius scottshawi[704]DHJP00048992|Antaeotricha Janzen24|658[0n]|BOLD:ABX5499  
 Chelonus manuelzumbadoi[705]BIOUG23153-E04|ESG Malaise Trap|585[3n]|BOLD:ACW6597  
 Chelonus gustavoinduni[706]BIOUG28148-H10|ESG Malaise Trap Year 2|582[0n]|BOLD:ADA0356  
 Chelonus marianopeireira[707]BIOUG30255-D09|Malaise trap PL12-3A|567[0n]|BOLD:ADC0083  
 Chelonus markshawii[708]DHJP00053672|Stenoma Janzen142|658[0n]|BOLD:ACL6642  
 Chelonus martajimezae[709]BIOUG27764-E10|ESG Malaise Trap Year 2|567[0n]|BOLD:ADA0878  
 Chelonus mayrabonillae[710]BIOUG52911-H04|Malaise trap PL12-3C|652[0n]|BOLD:ADB0889  
 Chelonus mayrabonillae[711]BIOUG29390-E08|Malaise trap PL12-9A|588[0n]|BOLD:ADB0889  
 Chelonus mayrabonillae[712]BIOUG28876-C11|Malaise trap PL12-9A|552[0n]|BOLD:ADB0889  
 Chelonus mayrabonillae[713]BIOUG29397-E02|Malaise trap PL12-9A|588[0n]|BOLD:ADB0889  
 Chelonus mayrabonillae[714]BIOUG29395-G08|Malaise trap PL12-9A|588[0n]|BOLD:ADB0889  
 Chelonus mayrabonillae[715]BIOUG29501-H09|Malaise trap PL12-9A|588[0n]|BOLD:ADB0889  
 Chelonus mayrabonillae[716]BIOUG29509-E11|Malaise trap PL12-9A|579[0n]|BOLD:ADB0889  
 Chelonus mayrabonillae[717]BIOUG28728-G11|Malaise trap PL12-9A|576[0n]|BOLD:ADB0889  
 Chelonus mayrabonillae[718]BIOUG29391-H05|Malaise trap PL12-9A|579[0n]|BOLD:ADB0889  
 Chelonus mayrabonillae[719]BIOUG52854-F03|Malaise trap PL12-3C|652[0n]|BOLD:ADB0889  
 Chelonus sigifredomarini[720]DHJP00037978|Euacidalia certissa|658[0n]|BOLD:AAM1445  
 Chelonus sigifredomarini[721]DHJP00064012|Euacidalia certissa|577[0n]|BOLD:AAM1445  
 Chelonus stevearonsoni[722]DHJP00029147|Leuciris fimbriaria|220[0n]  
 Chelonus stevearonsoni[723]DHJP00029120|Leuciris fimbriaria|639[0n]|BOLD:AAW3558  
 Chelonus stevearonsoni[724]DHJP00016436|Leuciris fimbriaria|658[0n]|BOLD:AAW3558  
 Chelonus stevearonsoni[725]DHJP00055364|Leuciris fimbriaria|658[0n]|BOLD:AAW3558  
 Chelonus stevearonsoni[726]DHJP00042849|Leuciris fimbriaria|658[0n]|BOLD:AAW3558  
 Chelonus yeimycedenoae[727]BIOUG44134-G02|Malaise trap PL12-3B|654[0n]|BOLD:ADW6358  
 Chelonus sergoriosii[728]BIOUG10752-A09|BSE Malaise Trap|658[0n]|BOLD:ACA6835  
 Chelonus nelsonzamorai[729]BIOUG29298-C10|Malaise trap PL12-9A|603[0n]|BOLD:ADB4135  
 Chelonus nelsonzamorai[730]BIOUG51542-B07|Malaise trap PL12-8A|653[0n]|BOLD:ADB4135  
 Chelonus kateperezae[731]BIOUG17967-C10|BSE Malaise Trap|582[0n]|BOLD:ACR8387  
 Chelonus lucariosae[732]DHJP00054552|chryBioLep01 BioLep174|621[0n]|BOLD:ACM2853  
 Chelonus lucariosae[733]DHJP00054555|chryBioLep01 BioLep174|658[0n]|BOLD:ACM2853  
 Chelonus lucariosae[734]DHJP00054549|chryBioLep01 BioLep174|658[0n]|BOLD:ACM2853  
 Chelonus lucariosae[735]DHJP00054563|chryBioLep01 BioLep174|658[0n]|BOLD:ACM2853  
 Chelonus lucariosae[736]DHJP00054557|chryBioLep01 BioLep174|658[0n]|BOLD:ACM2853  
 Chelonus lucariosae[737]DHJP00054782|chryBioLep01 BioLep174|658[0n]|BOLD:ACM2853  
 Chelonus lucariosae[738]DHJP00054559|chryBioLep01 BioLep174|658[0n]|BOLD:ACM2853  
 Chelonus lucariosae[739]DHJP00054561|chryBioLep01 BioLep174|658[0n]|BOLD:ACM2853  
 Chelonus lucariosae[740]DHJP00054550|chryBioLep01 BioLep174|658[0n]|BOLD:ACM2853  
 Chelonus lucariosae[741]DHJP00054567|chryBioLep01 BioLep174|658[0n]|BOLD:ACM2853  
 Chelonus michaelstroudii[742]DHJP00056003|gelJanzen01 Janzen485|670[0n]|BOLD:ACR3626  
 Chelonus Janzen9206[743]BIOUG49117-A10|Malaise trap PL12-5A|652[0n]|BOLD:ADZ9206  
 Chelonus melaniamunozae[744]BIOUG51371-G02|Malaise trap PL12-8A|655[0n]|BOLD:AAM1107  
 Chelonus melaniamunozae[745]DHJP00039043|gelJanzen01 Janzen758|658[0n]|BOLD:AAM1107  
 Chelonus melaniamunozae[746]DHJP00039065|gelJanzen01 Janzen758|658[0n]|BOLD:AAM1107  
 Chelonus melaniamunozae[747]DHJP00039064|gelJanzen01 Janzen758|632[0n]|BOLD:AAM1107  
 Chelonus melaniamunozae[748]DHJP00039052|gelJanzen01 Janzen758|636[0n]|BOLD:AAM1107  
 Chelonus meganmiltonae[749]BIOUG52426-D10|Malaise trap PL12-3C|653[0n]|BOLD:ADA8853  
 Chelonus meganmiltonae[750]BIOUG55013-H01|Malaise trap PL12-8C|654[0n]|BOLD:ADA8853  
 Chelonus meganmiltonae[751]BIOUG51361-A09|Malaise trap PL12-8A|654[0n]|BOLD:ADA8853  
 Chelonus meganmiltonae[752]BIOUG51352-C05|Malaise trap PL12-8A|653[0n]|BOLD:ADA8853  
 Chelonus meganmiltonae[753]BIOUG52336-B02|Malaise trap PL12-3C|652[0n]|BOLD:ADA8853  
 Chelonus meganmiltonae[754]BIOUG52311-A08|Malaise trap PL12-3C|654[0n]|BOLD:ADA8853  
 Chelonus meganmiltonae[755]BIOUG51487-A01|Malaise trap PL12-7B|650[0n]|BOLD:ADA8853  
 Chelonus meganmiltonae[756]BIOUG51439-D07|Malaise trap PL12-8A|641[0n]|BOLD:ADA8853  
 Chelonus meganmiltonae[757]BIOUG28769-G03|Malaise trap PL12-1A|594[0n]|BOLD:ADA8853  
 Chelonus meganmiltonae[758]BIOUG52078-C11|Malaise trap PL12-8B|655[0n]|BOLD:ADA8853  
 Chelonus meganmiltonae[759]BIOUG46559-H02|Malaise trap PL12-6B|655[0n]|BOLD:ADA8853  
 Chelonus meganmiltonae[760]BIOUG51350-D05|Malaise trap PL12-8A|654[0n]|BOLD:ADA8853  
 Chelonus meganmiltonae[761]BIOUG53121-D08|Malaise trap PL12-9C|653[0n]|BOLD:ADA8853  
 Chelonus meganmiltonae[762]BIOUG52334-H06|Malaise trap PL12-3C|654[0n]|BOLD:ADA8853  
 Chelonus meganmiltonae[763]BIOUG46559-G07|Malaise trap PL12-6B|654[0n]|BOLD:ADA8853  
 Chelonus meganmiltonae[764]BIOUG51352-A09|Malaise trap PL12-8A|655[0n]|BOLD:ADA8853  
 Chelonus stevestroudi[765]DHJP00056351|Antaeotricha Janzen13|656[0n]|BOLD:AAW3557  
 Chelonus stevestroudi[766]DHJP00056004|Antaeotricha Janzen290|670[0n]|BOLD:AAW3557  
 Chelonus stevestroudi[767]DHJP00056002|Antaeotricha similis|EPR01|670[0n]|BOLD:AAW3557  
 Chelonus stevestroudi[768]DHJP00020803|Antaeotricha BioLep46|660[0n]|BOLD:AAW3557  
 Chelonus sujevanratnasinghami[769]DHJP00047223|Rhobonda gaurisanaDHI04|658[0n]|BOLD:ABW9828  
 Chelonus sujevanratnasinghami[770]DHJP00047229|Rhobonda gaurisanaDHI04|658[0n]|BOLD:ABW9828  
 Chelonus sujevanratnasinghami[771]DHJP00046945|Rhobonda gaurisanaDHI04|658[0n]|BOLD:ABW9828  
 Chelonus sujevanratnasinghami[772]DHJP00046946|Rhobonda gaurisanaDHI04|658[0n]|BOLD:ABW9828  
 Chelonus sujevanratnasinghami[773]DHJP00047230|Rhobonda gaurisanaDHI04|658[0n]|BOLD:ABW9828  
 Chelonus sujevanratnasinghami[774]DHJP00046943|Rhobonda gaurisanaDHI04|658[0n]|BOLD:ABW9828  
 Chelonus sujevanratnasinghami[775]DHJP00046944|Rhobonda gaurisanaDHI04|658[0n]|BOLD:ABW9828  
 Chelonus sujevanratnasinghami[776]DHJP00046942|Rhobonda gaurisanaDHI04|658[0n]|BOLD:ABW9828  
 Chelonus sujevanratnasinghami[777]DHJP00047222|Rhobonda gaurisanaDHI04|658[0n]|BOLD:ABW9828  
 Chelonus normwoodleyi[778]DHJP00051920|Stenoma BioLep82|658[0n]|BOLD:AAW3564  
 Chelonus normwoodleyi[779]DHJP00036402|Stenoma BioLep82|658[0n]|BOLD:AAW3564  
 Chelonus normwoodleyi[780]DHJP00048090|Stenoma BioLep82|658[0n]|BOLD:AAW3564  
 Chelonus normwoodleyi[781]DHJP00048089|Stenoma BioLep82|658[0n]|BOLD:AAW3564  
 Chelonus normwoodleyi[782]DHJP00048196|Stenoma BioLep82|658[0n]|BOLD:AAW3564  
 Chelonus osvaldoespinozai[783]DHJP00042858|Stenoma Janzen230|658[0n]|BOLD:ABU8005  
 Chelonus osvaldoespinozai[784]DHJP00052184|Stenoma Janzen230|658[0n]|BOLD:ABU8005  
 Chelonus alejandrozaldivari[785]BIOUG54715-E10|Malaise trap PL12-3D|654[0n]|BOLD:AC00288  
 Chelonus alejandrozaldivari[786]BIOUG42804-B09|Malaise trap PL12-3B|652[0n]|BOLD:AC00288

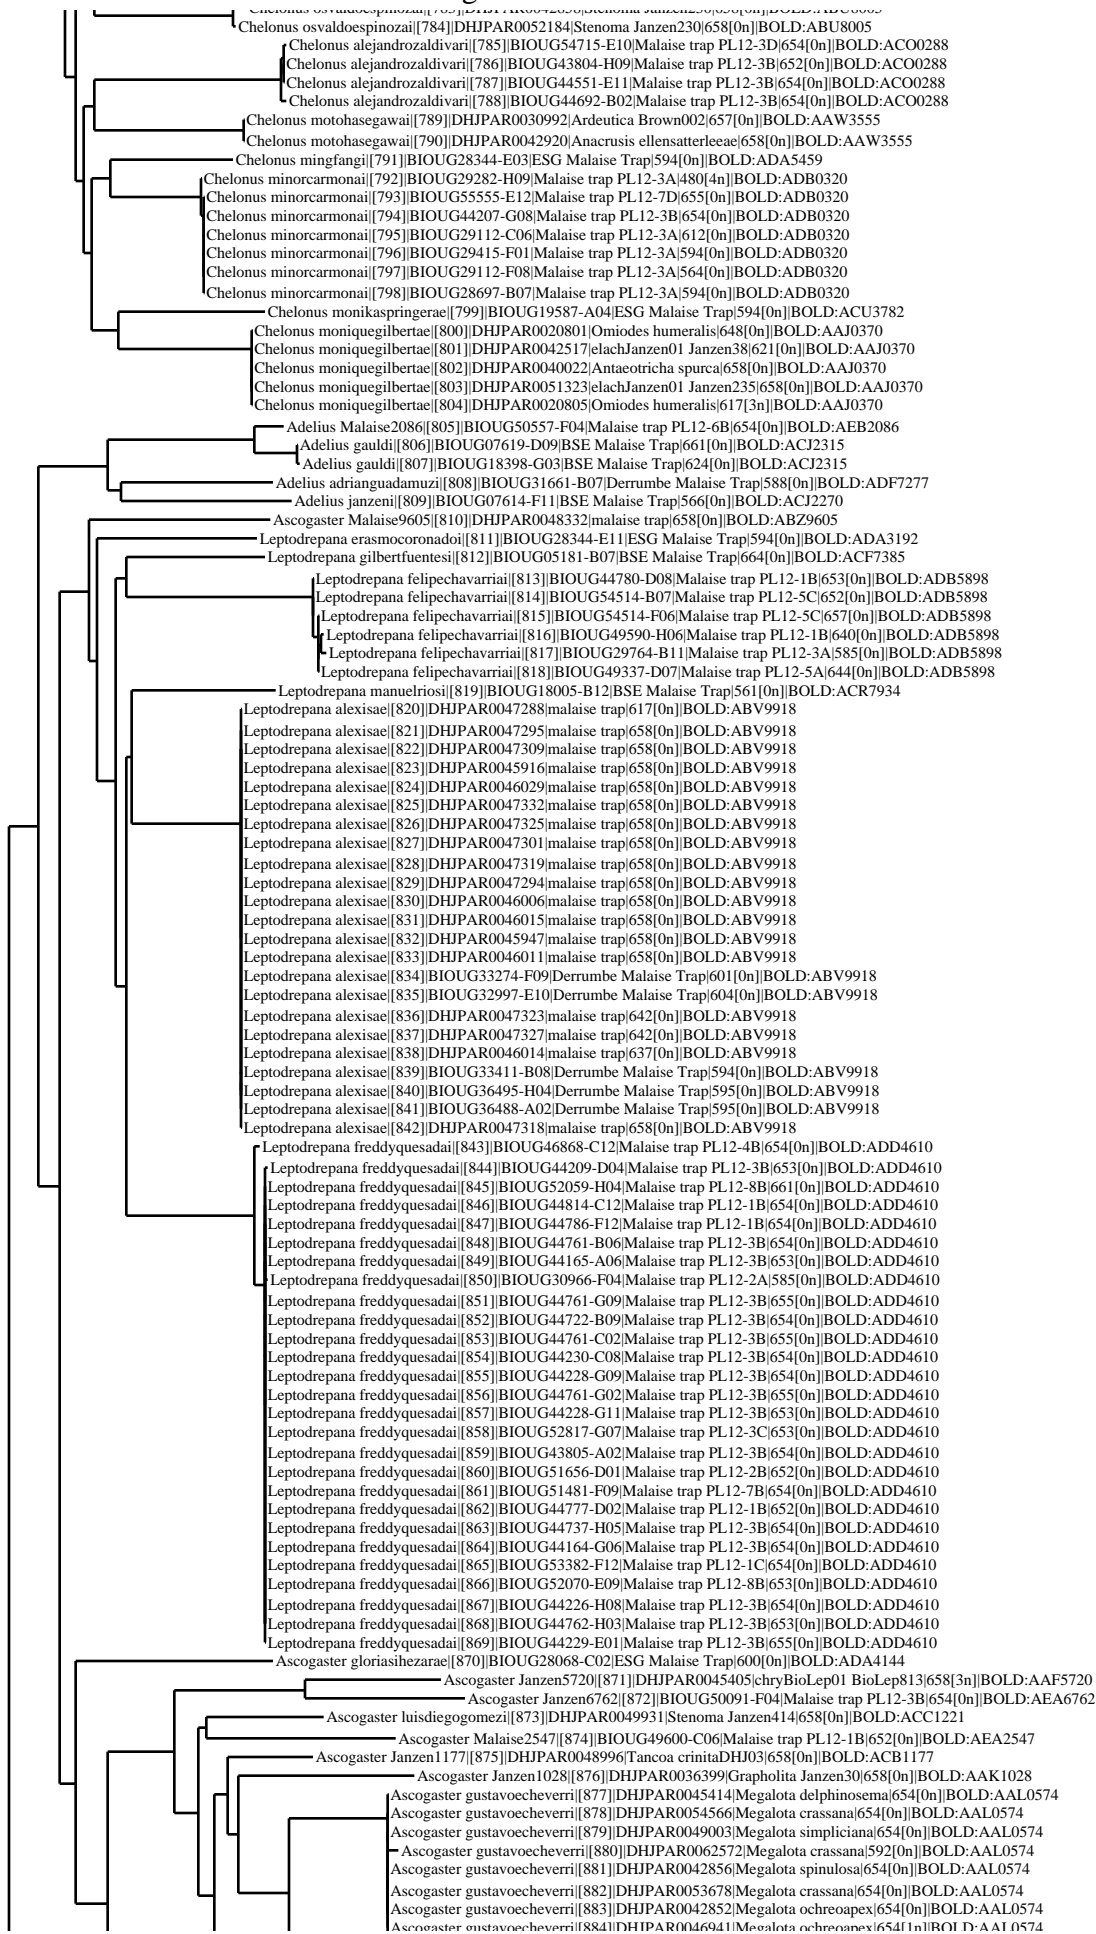

Phylogenetic tree showing relationships among various species, primarily from the genus *Phanerotoma* and *Ascogaster*. The tree is rooted at the top left and branches downwards. The species names are listed to the right of the branches, including their accession numbers and collection details. The tree shows a complex branching pattern, with many species of *Phanerotoma* clustered together, and a few species of *Ascogaster* interspersed among them. The tree is a cladogram showing the evolutionary relationships between the species.

Ascogaster gustavocheverri[882]|DHJPAR0053678|Megalota crassana[654|0n]|BOLD:AAL0574  
Ascogaster gustavocheverri[883]|DHJPAR0042852|Megalota ochreoapex[654|0n]|BOLD:AAL0574  
Ascogaster gustavocheverri[884]|DHJPAR0046941|Megalota ochreoapex[654|1n]|BOLD:AAL0574  
Ascogaster gustavocheverri[885]|DHJPAR0054560|Megalota crassana[654|1n]|BOLD:AAL0574  
Ascogaster Janzen31[886]|DHJPAR0037177|Megalota spinulosa[407|0n]  
Ascogaster guillermopereirai[887]|DHJPAR0051333|Mictopsichia Janzen330[658|0n]|BOLD:ACJ4048  
Ascogaster guillermopereirai[888]|DHJPAR0051327|Mictopsichia Janzen330[658|0n]|BOLD:ACJ4048  
Ascogaster guillermopereirai[889]|DHJPAR0051332|Mictopsichia Janzen330[624|0n]|BOLD:ACJ4048  
Ascogaster grettelvegae[890]|DHJPAR0043010|Episimus ortygia[623|0n]|BOLD:ABX8525  
Ascogaster Janzen372[891]|DHJPAR0040372|Strepsicrates Janzen342[239|0n]  
Ascogaster katyvandusenae[892]|DHJPAR0055824|Megalota spinulosa[658|0n]|BOLD:AAK1026  
Ascogaster katyvandusenae[893]|DHJPAR0035314|Amorbia decerpantana[658|0n]|BOLD:AAK1026  
Phanerotoma Janzen5955[894]|BIOUG46544-F10|Malaise trap PL12-6B[653|0n]|BOLD:ADX5955  
Phanerotoma Janzen5955[895]|BIOUG46567-G10|Malaise trap PL12-6B[657|0n]|BOLD:ADX5955  
Phanerotoma[896]|BIOUG54550-E02|Malaise trap PL12-5C[662|0n]|BOLD:ADX5955  
Phanerotoma Janzen5955[897]|BIOUG50487-H09|Malaise trap PL12-5A[659|0n]|BOLD:ADX5955  
Phanerotoma[898]|BIOUG54860-B03|Malaise trap PL12-5C[656|0n]|BOLD:ADX5955  
Phanerotoma[899]|BIOUG53968-E11|Malaise trap PL12-9C[658|0n]|BOLD:ADX5955  
Phanerotoma Janzen5955[900]|BIOUG49774-G09|Malaise trap PL12-3B[660|0n]|BOLD:ADX5955  
Phanerotoma Janzen5955[901]|BIOUG49281-A10|Malaise trap PL12-5B[658|0n]|BOLD:ADX5955  
Phanerotoma Janzen5955[902]|BIOUG44872-E04|Malaise trap PL12-1B[643|0n]|BOLD:ADX5955  
Phanerotoma Janzen5955[903]|BIOUG49367-D01|Malaise trap PL12-5A[659|0n]|BOLD:ADX5955  
Phanerotoma Janzen5955[904]|BIOUG52352-F07|Malaise trap PL12-3C[653|0n]|BOLD:ADX5955  
Phanerotoma[905]|BIOUG56227-C06|Malaise trap PL12-4D[659|0n]|BOLD:ADX5955  
Phanerotoma[906]|BIOUG55997-C05|Malaise trap PL12-7D[641|0n]|BOLD:ADX5955  
Phanerotoma[907]|BIOUG56227-A07|Malaise trap PL12-4D[660|0n]|BOLD:ADX5955  
Phanerotoma Janzen5955[908]|BIOUG49776-C06|Malaise trap PL12-3B[666|0n]|BOLD:ADX5955  
Phanerotoma Janzen5955[909]|BIOUG44207-C06|Malaise trap PL12-3B[656|0n]|BOLD:ADX5955  
Phanerotoma[910]|BIOUG54768-H08|Malaise trap PL12-8C[659|0n]|BOLD:ADX5955  
Phanerotoma Janzen5955[911]|BIOUG52352-H05|Malaise trap PL12-3C[657|0n]|BOLD:ADX5955  
Phanerotoma[912]|BIOUG56451-C01|Malaise trap PL12-6D[656|0n]|BOLD:ADX5955  
Phanerotoma Janzen5955[913]|BIOUG46559-G12|Malaise trap PL12-6B[660|0n]|BOLD:ADX5955  
Phanerotoma Janzen5955[914]|BIOUG46571-A02|Malaise trap PL12-6B[658|0n]|BOLD:ADX5955  
Phanerotoma Janzen5955[915]|BIOUG51393-H06|Malaise trap PL12-8A[658|0n]|BOLD:ADX5955  
Phanerotoma[916]|BIOUG54626-B07|Malaise trap PL12-4D[657|0n]|BOLD:ADX5955  
Phanerotoma Janzen5955[917]|BIOUG51826-D12|Malaise trap PL12-7B[645|0n]|BOLD:ADX5955  
Phanerotoma Janzen5955[918]|BIOUG52824-D03|Malaise trap PL12-3C[642|0n]|BOLD:ADX5955  
Phanerotoma Janzen5955[919]|BIOUG44686-F02|Malaise trap PL12-3B[655|0n]|BOLD:ADX5955  
Phanerotoma Janzen5955[920]|BIOUG49375-D06|Malaise trap PL12-5B[657|0n]|BOLD:ADX5955  
Phanerotoma[921]|BIOUG53877-F06|Malaise trap PL12-9C[658|0n]|BOLD:ADX5955  
Phanerotoma Janzen5955[922]|BIOUG51827-F11|Malaise trap PL12-7B[654|0n]|BOLD:ADX5955  
Phanerotoma Janzen5955[923]|BIOUG49375-C12|Malaise trap PL12-5B[661|0n]|BOLD:ADX5955  
Phanerotoma Janzen5955[924]|BIOUG51854-C11|Malaise trap PL12-7B[643|0n]|BOLD:ADX5955  
Phanerotoma Janzen5955[925]|BIOUG52367-C12|Malaise trap PL12-3C[658|0n]|BOLD:ADX5955  
Phanerotoma Janzen5955[926]|BIOUG49638-F09|Malaise trap PL12-1B[658|0n]|BOLD:ADX5955  
Phanerotoma Janzen5955[927]|BIOUG50600-D11|Malaise trap PL12-5A[658|0n]|BOLD:ADX5955  
Phanerotoma Janzen5955[928]|BIOUG50485-G07|Malaise trap PL12-5A[658|0n]|BOLD:ADX5955  
Phanerotoma[929]|BIOUG56256-H01|Malaise trap PL12-6D[657|0n]|BOLD:ADX5955  
Phanerotoma Janzen5955[930]|BIOUG50485-F06|Malaise trap PL12-5A[659|0n]|BOLD:ADX5955  
Phanerotoma Janzen5955[931]|BIOUG44386-C02|Malaise trap PL12-3B[659|0n]|BOLD:ADX5955  
Phanerotoma[932]|BIOUG56230-G09|Malaise trap PL12-4D[644|0n]|BOLD:ADX5955  
Phanerotoma[933]|BIOUG55830-C03|Malaise trap PL12-4D[640|0n]|BOLD:ADX5955  
Phanerotoma[934]|BIOUG56342-H04|Malaise trap PL12-9D[656|0n]|BOLD:ADX5955  
Phanerotoma Janzen5955[935]|BIOUG53160-B04|Malaise trap PL12-9C[660|0n]|BOLD:ADX5955  
Phanerotoma Janzen5955[936]|BIOUG52432-D11|Malaise trap PL12-3C[657|0n]|BOLD:ADX5955  
Phanerotoma Janzen5955[937]|BIOUG46756-F03|Malaise trap PL12-4B[642|0n]|BOLD:ADX5955  
Phanerotoma Janzen5955[938]|BIOUG51902-B07|Malaise trap PL12-7B[660|0n]|BOLD:ADX5955  
Phanerotoma Janzen5955[939]|BIOUG51350-B05|Malaise trap PL12-8A[640|0n]|BOLD:ADX5955  
Phanerotoma Janzen5955[940]|BIOUG46760-C10|Malaise trap PL12-4B[658|0n]|BOLD:ADX5955  
Phanerotoma Janzen5955[941]|BIOUG48971-E02|Malaise trap PL12-5A[645|0n]|BOLD:ADX5955  
Phanerotoma Janzen5955[942]|BIOUG44206-G04|Malaise trap PL12-3B[658|0n]|BOLD:ADX5955  
Phanerotoma Janzen5955[943]|BIOUG44172-F04|Malaise trap PL12-3B[639|0n]|BOLD:ADX5955  
Phanerotoma[944]|BIOUG55502-F01|Malaise trap PL12-1D[641|0n]|BOLD:ADX5955  
Phanerotoma[945]|BIOUG53861-B10|Malaise trap PL12-9C[641|0n]|BOLD:ADX5955  
Phanerotoma Janzen5955[946]|BIOUG51498-D11|Malaise trap PL12-8B[640|0n]|BOLD:ADX5955  
Phanerotoma Janzen5955[947]|BIOUG44780-D12|Malaise trap PL12-1B[657|0n]|BOLD:ADX5955  
Phanerotoma Janzen5955[948]|BIOUG52935-F06|Malaise trap PL12-3C[640|0n]|BOLD:ADX5955  
Phanerotoma[949]|BIOUG56256-G08|Malaise trap PL12-6D[657|0n]|BOLD:ADX5955  
Phanerotoma Janzen5955[950]|BIOUG52039-C05|Malaise trap PL12-8B[656|0n]|BOLD:ADX5955  
Phanerotoma[951]|BIOUG55979-E08|Malaise trap PL12-4D[656|0n]|BOLD:ADX5955  
Phanerotoma Janzen5955[952]|BIOUG51829-G08|Malaise trap PL12-7B[640|0n]|BOLD:ADX5955  
Phanerotoma Janzen5955[953]|BIOUG49303-E08|Malaise trap PL12-5B[645|0n]|BOLD:ADX5955  
Phanerotoma Janzen5955[954]|BIOUG46567-G07|Malaise trap PL12-6B[657|0n]|BOLD:ADX5955  
Phanerotoma Janzen5955[955]|BIOUG51350-B11|Malaise trap PL12-8A[657|0n]|BOLD:ADX5955  
Phanerotoma[956]|BIOUG56227-B12|Malaise trap PL12-4D[657|0n]|BOLD:ADX5955  
Phanerotoma Janzen5955[957]|BIOUG48840-C01|Malaise trap PL12-5A[657|0n]|BOLD:ADX5955  
Phanerotoma Janzen5955[958]|BIOUG52294-G11|Malaise trap PL12-3C[640|0n]|BOLD:ADX5955  
Phanerotoma Janzen5955[959]|BIOUG52138-E04|Malaise trap PL12-8B[658|0n]|BOLD:ADX5955  
Phanerotoma Janzen5955[960]|BIOUG46559-G05|Malaise trap PL12-6B[656|0n]|BOLD:ADX5955  
Phanerotoma Janzen5955[961]|BIOUG49348-D08|Malaise trap PL12-3B[642|0n]|BOLD:ADX5955  
Phanerotoma Janzen5955[962]|BIOUG44846-A11|Malaise trap PL12-1B[643|0n]|BOLD:ADX5955  
Phanerotoma Janzen5955[963]|BIOUG51543-H01|Malaise trap PL12-8A[640|0n]|BOLD:ADX5955  
Phanerotoma[964]|BIOUG55975-H06|Malaise trap PL12-4D[664|0n]|BOLD:ADX5955  
Phanerotoma Janzen5955[965]|BIOUG49810-G04|Malaise trap PL12-3B[657|0n]|BOLD:ADX5955  
Phanerotoma[966]|BIOUG56233-A08|Malaise trap PL12-4D[658|0n]|BOLD:ADX5955  
Phanerotoma[967]|BIOUG54622-D04|Malaise trap PL12-1D[658|0n]|BOLD:ADX5955  
Phanerotoma Janzen5955[968]|BIOUG53054-F06|Malaise trap PL12-3C[658|0n]|BOLD:ADX5955  
Phanerotoma[969]|BIOUG56077-E06|Malaise trap PL12-9D[656|0n]|BOLD:ADX5955  
Phanerotoma[970]|BIOUG55656-B11|Malaise trap PL12-1D[643|0n]|BOLD:ADX5955  
Phanerotoma Janzen5955[971]|BIOUG44019-H03|Malaise trap PL12-1B[657|0n]|BOLD:ADX5955  
Phanerotoma Janzen5955[972]|BIOUG52122-F03|Malaise trap PL12-8B[658|0n]|BOLD:ADX5955  
Phanerotoma Janzen5955[973]|BIOUG51885-H11|Malaise trap PL12-7B[640|0n]|BOLD:ADX5955  
Phanerotoma Janzen5955[974]|BIOUG48966-H04|Malaise trap PL12-5A[663|0n]|BOLD:ADX5955  
Phanerotoma Janzen5955[975]|BIOUG51375-A10|Malaise trap PL12-8A[658|0n]|BOLD:ADX5955  
Phanerotoma Janzen5955[976]|BIOUG47379-F06|Malaise trap PL12-5A[660|0n]|BOLD:ADX5955  
Phanerotoma[977]|BIOUG56227-A12|Malaise trap PL12-4D[640|0n]|BOLD:ADX5955  
Phanerotoma Janzen5955[978]|BIOUG52432-A08|Malaise trap PL12-3C[640|0n]|BOLD:ADX5955  
Phanerotoma Janzen5955[979]|BIOUG52368-E02|Malaise trap PL12-3C[642|0n]|BOLD:ADX5955  
Phanerotoma Janzen5955[980]|BIOUG52034-G09|Malaise trap PL12-8B[642|0n]|BOLD:ADX5955  
Phanerotoma Janzen5955[981]|BIOUG47383-G02|Malaise trap PL12-5A[656|0n]|BOLD:ADX5955  
Phanerotoma[982]|BIOUG54628-D10|Malaise trap PL12-4D[640|0n]|BOLD:ADX5955

Phanerotoma Janzen5955[980]BIOUG52034-G09|Malaise trap PL12-8B|642[0n]|BOLD:ADX5955  
Phanerotoma Janzen5955[981]BIOUG47383-G02|Malaise trap PL12-5A|656[0n]|BOLD:ADX5955  
Phanerotoma[982]BIOUG54628-D10|Malaise trap PL12-4D|640[0n]|BOLD:ADX5955  
Phanerotoma Janzen5955[983]BIOUG51431-C05|Malaise trap PL12-8A|642[0n]|BOLD:ADX5955  
Phanerotoma Janzen5955[984]BIOUG46756-F04|Malaise trap PL12-4B|658[0n]|BOLD:ADX5955  
Phanerotoma[985]BIOUG55809-H10|Malaise trap PL12-1D|649[0n]|BOLD:ADX5955  
Phanerotoma Janzen5955[986]BIOUG47383-F08|Malaise trap PL12-5A|652[0n]|BOLD:ADX5955  
Phanerotoma Janzen5955[987]BIOUG51826-E04|Malaise trap PL12-7B|656[0n]|BOLD:ADX5955  
Phanerotoma Janzen5955[988]BIOUG48966-H02|Malaise trap PL12-5A|641[0n]|BOLD:ADX5955  
Phanerotoma[989]BIOUG54782-B02|Malaise trap PL12-8C|659[0n]|BOLD:ADX5955  
Phanerotoma Janzen5955[990]BIOUG49593-A09|Malaise trap PL12-1B|659[0n]|BOLD:ADX5955  
Phanerotoma Janzen5955[991]BIOUG49124-F07|Malaise trap PL12-5A|640[0n]|BOLD:ADX5955  
Phanerotoma Janzen5955[992]BIOUG52352-G03|Malaise trap PL12-3C|657[0n]|BOLD:ADX5955  
Phanerotoma Janzen5955[993]BIOUG51825-A05|Malaise trap PL12-7B|643[0n]|BOLD:ADX5955  
Phanerotoma Janzen5955[994]BIOUG46548-D11|Malaise trap PL12-6B|640[0n]|BOLD:ADX5955  
Phanerotoma Janzen5955[995]BIOUG49590-H04|Malaise trap PL12-1B|657[0n]|BOLD:ADX5955  
Phanerotoma Janzen5955[996]BIOUG53514-F10|Malaise trap PL12-6C|660[0n]|BOLD:ADX5955  
Phanerotoma[997]BIOUG56233-A02|Malaise trap PL12-4D|660[0n]|BOLD:ADX5955  
Phanerotoma Janzen5955[998]BIOUG44177-H08|Malaise trap PL12-3B|658[0n]|BOLD:ADX5955  
Phanerotoma[999]BIOUG54554-B11|Malaise trap PL12-5C|661[0n]|BOLD:ADX5955  
Phanerotoma[1000]BIOUG55056-C08|Malaise trap PL12-8C|654[0n]|BOLD:ADX5955  
Phanerotoma Janzen5955[1001]BIOUG52535-A11|Malaise trap PL12-3C|659[0n]|BOLD:ADX5955  
Phanerotoma[1002]BIOUG56227-B07|Malaise trap PL12-4D|658[0n]|BOLD:ADX5955  
Phanerotoma Janzen5955[1003]BIOUG49525-D01|Malaise trap PL12-5B|660[0n]|BOLD:ADX5955  
Phanerotoma[1004]BIOUG55860-D09|Malaise trap PL12-4D|663[0n]|BOLD:ADX5955  
Phanerotoma[1005]BIOUG56077-E05|Malaise trap PL12-9D|657[0n]|BOLD:ADX5955  
Phanerotoma[1006]BIOUG55009-A11|Malaise trap PL12-8C|657[0n]|BOLD:ADX5955  
Phanerotoma Janzen5955[1007]BIOUG51387-H02|Malaise trap PL12-8A|657[0n]|BOLD:ADX5955  
Phanerotoma Janzen5955[1008]BIOUG50585-G08|Malaise trap PL12-5A|664[0n]|BOLD:ADX5955  
Phanerotoma Janzen5955[1009]BIOUG51829-G11|Malaise trap PL12-7B|658[0n]|BOLD:ADX5955  
Phanerotoma Janzen5955[1010]BIOUG52138-G02|Malaise trap PL12-8B|658[0n]|BOLD:ADX5955  
Phanerotoma Janzen5955[1011]BIOUG53206-F04|Malaise trap PL12-3C|657[0n]|BOLD:ADX5955  
Phanerotoma Janzen5955[1012]BIOUG52059-F02|Malaise trap PL12-8B|660[0n]|BOLD:ADX5955  
Phanerotoma Janzen5955[1013]BIOUG52352-H10|Malaise trap PL12-3C|648[0n]|BOLD:ADX5955  
Phanerotoma Janzen5955[1014]BIOUG51826-E01|Malaise trap PL12-7B|655[0n]|BOLD:ADX5955  
Phanerotoma Janzen5955[1015]BIOUG49121-B09|Malaise trap PL12-5A|657[0n]|BOLD:ADX5955  
Phanerotoma Janzen5955[1016]BIOUG51854-D03|Malaise trap PL12-7B|661[0n]|BOLD:ADX5955  
Phanerotoma Janzen5955[1017]BIOUG51886-C08|Malaise trap PL12-7B|656[0n]|BOLD:ADX5955  
Phanerotoma Janzen5955[1018]BIOUG52968-C10|Malaise trap PL12-3C|657[0n]|BOLD:ADX5955  
Phanerotoma Janzen5955[1019]BIOUG51350-B09|Malaise trap PL12-8A|664[0n]|BOLD:ADX5955  
Phanerotoma Janzen5955[1020]BIOUG52094-H06|Malaise trap PL12-3C|659[0n]|BOLD:ADX5955  
Phanerotoma Janzen5955[1021]BIOUG52120-E12|Malaise trap PL12-8B|655[0n]|BOLD:ADX5955  
Phanerotoma Janzen5955[1022]BIOUG49111-G03|Malaise trap PL12-5A|659[0n]|BOLD:ADX5955  
Phanerotoma Janzen5955[1023]BIOUG52352-H01|Malaise trap PL12-3C|659[0n]|BOLD:ADX5955  
Phanerotoma Janzen5955[1024]BIOUG49280-H08|Malaise trap PL12-5B|642[0n]|BOLD:ADX5955  
Phanerotoma Janzen5955[1025]BIOUG51828-E03|Malaise trap PL12-7B|641[0n]|BOLD:ADX5955  
Phanerotoma Janzen5955[1026]BIOUG48840-D07|Malaise trap PL12-5A|658[0n]|BOLD:ADX5955  
Phanerotoma Janzen5955[1027]BIOUG51829-G10|Malaise trap PL12-7B|641[0n]|BOLD:ADX5955  
Phanerotoma Janzen5955[1028]BIOUG44762-D10|Malaise trap PL12-3B|658[0n]|BOLD:ADX5955  
Phanerotoma Janzen5955[1029]BIOUG49610-G12|Malaise trap PL12-1B|660[0n]|BOLD:ADX5955  
Phanerotoma[1030]BIOUG53973-B09|Malaise trap PL12-9C|657[0n]|BOLD:ADX5955  
Phanerotoma Janzen5955[1031]BIOUG49616-D04|Malaise trap PL12-1B|642[0n]|BOLD:ADX5955  
Phanerotoma[1032]BIOUG56227-B05|Malaise trap PL12-4D|660[0n]|BOLD:ADX5955  
Phanerotoma[1033]BIOUG55965-D08|Malaise trap PL12-4D|641[0n]|BOLD:ADX5955  
Phanerotoma[1034]BIOUG54782-B06|Malaise trap PL12-8C|658[0n]|BOLD:ADX5955  
Phanerotoma Janzen5955[1035]BIOUG50487-H10|Malaise trap PL12-5A|658[0n]|BOLD:ADX5955  
Phanerotoma Janzen5955[1036]BIOUG48966-H09|Malaise trap PL12-5A|658[0n]|BOLD:ADX5955  
Phanerotoma[1037]BIOUG56233-A03|Malaise trap PL12-4D|656[0n]|BOLD:ADX5955  
Phanerotoma Janzen5955[1038]BIOUG51882-H01|Malaise trap PL12-7B|641[0n]|BOLD:ADX5955  
Phanerotoma anamariamongae[1039]BIOUG30934-H03|Malaise trap PL12-2A|504[0n]|BOLD:ADA6322  
Phanerotoma anamariamongae[1040]BIOUG29135-F05|Malaise trap PL12-1A|585[0n]|BOLD:ADA6322  
Phanerotoma anamariamongae[1041]BIOUG28770-H10|Malaise trap PL12-1A|585[0n]|BOLD:ADA6322  
Phanerotoma anamariamongae[1042]BIOUG29000-F05|Malaise trap PL12-9A|588[0n]|BOLD:ADA6322  
Phanerotoma anamariamongae[1043]BIOUG30004-F07|Malaise trap PL12-3A|600[0n]|BOLD:ADA6322  
Phanerotoma anamariamongae[1044]BIOUG29783-D03|Malaise trap PL12-3A|600[0n]|BOLD:ADA6322  
Phanerotoma anamariamongae[1045]BIOUG29300-G05|Malaise trap PL12-9A|594[0n]|BOLD:ADA6322  
Phanerotoma anamariamongae[1046]BIOUG29646-G09|Malaise trap PL12-3A|594[0n]|BOLD:ADA6322  
Phanerotoma anamariamongae[1047]BIOUG28846-B09|Malaise trap PL12-7A|564[0n]|BOLD:ADA6322  
Phanerotoma anamariamongae[1048]BIOUG28729-D07|Malaise trap PL12-9A|564[0n]|BOLD:ADA6322  
Phanerotoma anamariamongae[1049]BIOUG28674-H11|Malaise trap PL12-9A|564[0n]|BOLD:ADA6322  
Phanerotoma anamariamongae[1050]BIOUG29689-G09|Malaise trap PL12-3A|555[0n]|BOLD:ADA6322  
Phanerotoma anamariamongae[1051]BIOUG28728-G10|Malaise trap PL12-9A|582[0n]|BOLD:ADA6322  
Phanerotoma anamariamongae[1052]BIOUG28724-C04|Malaise trap PL12-9A|600[0n]|BOLD:ADA6322  
Phanerotoma anamariamongae[1053]BIOUG29223-H09|Malaise trap PL12-9A|555[0n]|BOLD:ADA6322  
Phanerotoma anamariamongae[1054]BIOUG28825-B01|Malaise trap PL12-9A|564[0n]|BOLD:ADA6322  
Phanerotoma anamariamongae[1055]BIOUG29058-B09|Malaise trap PL12-1A|564[0n]|BOLD:ADA6322  
Phanerotoma anamariamongae[1056]BIOUG28721-A12|Malaise trap PL12-9A|564[1n]|BOLD:ADA6322  
Phanerotoma anamariamongae[1057]BIOUG29064-E02|Malaise trap PL12-1A|501[2n]|BOLD:ADA6322  
Phanerotoma anamariamongae[1058]BIOUG56110-A09|Malaise trap PL12-4D|652[0n]|BOLD:ADA6322  
Phanerotoma anamariamongae[1059]BIOUG49781-C11|Malaise trap PL12-3B|652[0n]|BOLD:ADA6322  
Phanerotoma anamariamongae[1060]BIOUG29783-D02|Malaise trap PL12-3A|594[0n]|BOLD:ADA6322  
Phanerotoma anamariamongae[1061]BIOUG28728-A09|Malaise trap PL12-9A|588[0n]|BOLD:ADA6322  
Phanerotoma anamariamongae[1062]BIOUG28779-B01|Malaise trap PL12-1A|594[0n]|BOLD:ADA6322  
Phanerotoma anamariamongae[1063]BIOUG28743-A02|Malaise trap PL12-4A|594[0n]|BOLD:ADA6322  
Phanerotoma anamariamongae[1064]BIOUG29603-F01|Malaise trap PL12-9A|594[0n]|BOLD:ADA6322  
Phanerotoma anamariamongae[1065]BIOUG29322-E07|Malaise trap PL12-6A|594[0n]|BOLD:ADA6322  
Phanerotoma anamariamongae[1066]BIOUG28728-G08|Malaise trap PL12-9A|594[0n]|BOLD:ADA6322  
Phanerotoma anamariamongae[1067]BIOUG30232-B11|Malaise trap PL12-3A|565[0n]|BOLD:ADA6322  
Phanerotoma anamariamongae[1068]BIOUG28728-G09|Malaise trap PL12-9A|564[0n]|BOLD:ADA6322  
Phanerotoma anamariamongae[1069]BIOUG30916-E08|Malaise trap PL12-2A|585[0n]|BOLD:ADA6322  
Phanerotoma anamariamongae[1070]BIOUG51684-D10|Malaise trap PL12-2B|653[0n]|BOLD:ADA6322  
Phanerotoma anamariamongae[1071]BIOUG28667-D07|Malaise trap PL12-9A|576[0n]|BOLD:ADA6322  
Phanerotoma anamariamongae[1072]BIOUG29229-F07|Malaise trap PL12-9A|555[0n]|BOLD:ADA6322  
Phanerotoma anamariamongae[1073]BIOUG28770-H07|Malaise trap PL12-1A|591[0n]|BOLD:ADA6322  
Phanerotoma anamariamongae[1074]BIOUG29794-F10|Malaise trap PL12-3A|555[0n]|BOLD:ADA6322  
Phanerotoma anamariamongae[1075]BIOUG28830-H04|Malaise trap PL12-9A|600[0n]|BOLD:ADA6322  
Phanerotoma anamariamongae[1076]BIOUG28678-G12|Malaise trap PL12-9A|606[0n]|BOLD:ADA6322  
Phanerotoma anamariamongae[1077]BIOUG29831-A06|Malaise trap PL12-3A|603[0n]|BOLD:ADA6322  
Phanerotoma anamariamongae[1078]BIOUG54922-G01|Malaise trap PL12-5C|649[0n]|BOLD:ADA6322  
Phanerotoma anamariamongae[1079]BIOUG29717-E03|Malaise trap PL12-3A|564[0n]|BOLD:ADA6322  
Phanerotoma anamariamongae[1080]BIOUG28876-C09|Malaise trap PL12-9A|564[0n]|BOLD:ADA6322

Phanerotoma anamariamongae[[1078]]BIOUG54922-G01|Malaise trap PL12-5C|649[0n]|BOLD:ADA6322  
Phanerotoma anamariamongae[[1079]]BIOUG29717-E03|Malaise trap PL12-3A|564[0n]|BOLD:ADA6322  
Phanerotoma anamariamongae[[1080]]BIOUG28876-C09|Malaise trap PL12-9A|564[0n]|BOLD:ADA6322  
Phanerotoma anamariamongae[[1081]]BIOUG28831-F02|Malaise trap PL12-9A|594[0n]|BOLD:ADA6322  
Phanerotoma anamariamongae[[1082]]BIOUG29646-A01|Malaise trap PL12-3A|564[0n]|BOLD:ADA6322  
Phanerotoma anamariamongae[[1083]]BIOUG28823-E08|Malaise trap PL12-9A|594[0n]|BOLD:ADA6322  
Phanerotoma anamariamongae[[1084]]BIOUG28770-H11|Malaise trap PL12-1A|600[0n]|BOLD:ADA6322  
Phanerotoma anamariamongae[[1085]]BIOUG28830-H03|Malaise trap PL12-9A|576[0n]|BOLD:ADA6322  
Phanerotoma anamariamongae[[1086]]BIOUG30914-C02|Malaise trap PL12-2A|594[0n]|BOLD:ADA6322  
Phanerotoma anamariamongae[[1087]]BIOUG29689-D06|Malaise trap PL12-3A|594[0n]|BOLD:ADA6322  
Phanerotoma anamariamongae[[1088]]BIOUG30959-G10|Malaise trap PL12-2A|585[0n]|BOLD:ADA6322  
Phanerotoma anamariamongae[[1089]]BIOUG28777-A04|Malaise trap PL12-1A|555[0n]|BOLD:ADA6322  
Phanerotoma anamariamongae[[1090]]BIOUG28651-A02|Malaise trap PL12-1A|558[0n]|BOLD:ADA6322  
Phanerotoma anamariamongae[[1091]]BIOUG29473-H08|Malaise trap PL12-3A|552[0n]|BOLD:ADA6322  
Phanerotoma anamariamongae[[1092]]BIOUG29073-F06|Malaise trap PL12-7A|552[0n]|BOLD:ADA6322  
Phanerotoma anamariamongae[[1093]]BIOUG28388-H02|Malaise trap PL12-9X|606[3n]|BOLD:ADA6322  
Phanerotoma anamariamongae[[1094]]BIOUG54531-A08|Malaise trap PL12-5C|651[0n]|BOLD:ADA6322  
Phanerotoma anamariamongae[[1095]]BIOUG48838-A01|Malaise trap PL12-5A|656[0n]|BOLD:ADA6322  
Phanerotoma anamariamongae[[1096]]BIOUG51825-A10|Malaise trap PL12-7B|640[0n]|BOLD:ADA6322  
Phanerotoma anamariamongae[[1097]]BIOUG46553-B05|Malaise trap PL12-6B|640[0n]|BOLD:ADA6322  
Phanerotoma anamariamongae[[1098]]BIOUG49284-D12|Malaise trap PL12-5B|653[0n]|BOLD:ADA6322  
Phanerotoma anamariamongae[[1099]]BIOUG29165-D02|Malaise trap PL12-6A|459[0n]|BOLD:ADA6322  
Phanerotoma anamariamongae[[1100]]BIOUG48838-B04|Malaise trap PL12-5A|656[0n]|BOLD:ADA6322  
Phanerotoma anamariamongae[[1101]]BIOUG48966-H08|Malaise trap PL12-5A|651[0n]|BOLD:ADA6322  
Phanerotoma anamariamongae[[1102]]BIOUG55996-A10|Malaise trap PL12-7D|651[0n]|BOLD:ADA6322  
Phanerotoma anamariamongae[[1103]]BIOUG54531-A04|Malaise trap PL12-5C|651[0n]|BOLD:ADA6322  
Phanerotoma anamariamongae[[1104]]BIOUG54774-A09|Malaise trap PL12-8C|650[0n]|BOLD:ADA6322  
Phanerotoma anamariamongae[[1105]]BIOUG51829-H01|Malaise trap PL12-7B|646[0n]|BOLD:ADA6322  
Phanerotoma anamariamongae[[1106]]BIOUG54626-A09|Malaise trap PL12-4D|640[0n]|BOLD:ADA6322  
Phanerotoma anamariamongae[[1107]]BIOUG30934-H04|Malaise trap PL12-2A|519[0n]|BOLD:ADA6322  
Phanerotoma anamariamongae[[1108]]BIOUG29000-F06|Malaise trap PL12-9A|555[0n]|BOLD:ADA6322  
Phanerotoma anacordobae[[1109]]BIOUG18290-D04|BSE Malaise Trap|564[0n]|BOLD:ACJ2167  
Phanerotoma anacordobae[[1110]]BIOUG10753-B11|BSE Malaise Trap|553[0n]|BOLD:ACJ2167  
Phanerotoma anacordobae[[1111]]BIOUG10016-G07|BSE Malaise Trap|568[0n]|BOLD:ACJ2167  
Phanerotoma anacordobae[[1112]]BIOUG18290-H09|BSE Malaise Trap|555[0n]|BOLD:ACJ2167  
Phanerotoma anacordobae[[1113]]BIOUG07616-F09|BSE Malaise Trap|535[0n]|BOLD:ACJ2167  
Phanerotoma anacordobae[[1114]]BIOUG18498-H02|BSE Malaise Trap|564[0n]|BOLD:ACJ2167  
Phanerotoma anacordobae[[1115]]BIOUG07781-H06|BSE Malaise Trap|576[0n]|BOLD:ACJ2167  
Phanerotoma anacordobae[[1116]]BIOUG17335-E04|BSE Malaise Trap|567[0n]|BOLD:ACJ2167  
Phanerotoma anacordobae[[1117]]BIOUG10016-H06|BSE Malaise Trap|565[0n]|BOLD:ACJ2167  
Phanerotoma anacordobae[[1118]]BIOUG18661-G06|BSE Malaise Trap|594[1n]|BOLD:ACJ2167  
Phanerotoma anacordobae[[1119]]BIOUG17684-D11|BSE Malaise Trap|555[0n]|BOLD:ACJ2167  
Phanerotoma anacordobae[[1120]]BIOUG10247-H02|BSE Malaise Trap|544[0n]|BOLD:ACJ2167  
Phanerotoma anacordobae[[1121]]BIOUG07616-D05|BSE Malaise Trap|542[0n]|BOLD:ACJ2167  
Phanerotoma anacordobae[[1122]]BIOUG18499-H09|BSE Malaise Trap|564[0n]|BOLD:ACJ2167  
Phanerotoma anacordobae[[1123]]BIOUG17346-E10|BSE Malaise Trap|576[0n]|BOLD:ACJ2167  
Phanerotoma anacordobae[[1124]]BIOUG17684-B01|BSE Malaise Trap|564[0n]|BOLD:ACJ2167  
Phanerotoma anacordobae[[1125]]BIOUG18290-E12|BSE Malaise Trap|564[0n]|BOLD:ACJ2167  
Phanerotoma anacordobae[[1126]]BIOUG17684-B12|BSE Malaise Trap|555[0n]|BOLD:ACJ2167  
Phanerotoma anacordobae[[1127]]BIOUG18290-C10|BSE Malaise Trap|582[0n]|BOLD:ACJ2167  
Phanerotoma anacordobae[[1128]]BIOUG18499-A12|BSE Malaise Trap|594[0n]|BOLD:ACJ2167  
Phanerotoma anacordobae[[1129]]BIOUG10017-H03|BSE Malaise Trap|597[0n]|BOLD:ACJ2167  
Phanerotoma anacordobae[[1130]]BIOUG08266-F05|BSE Malaise Trap|597[1n]|BOLD:ACJ2167  
Phanerotoma anacordobae[[1131]]BIOUG18397-C12|BSE Malaise Trap|632[0n]|BOLD:ACJ2167  
Phanerotoma anacordobae[[1132]]BIOUG18398-D11|BSE Malaise Trap|632[0n]|BOLD:ACJ2167  
Phanerotoma anacordobae[[1133]]BIOUG17335-H08|BSE Malaise Trap|600[0n]|BOLD:ACJ2167  
Phanerotoma anacordobae[[1134]]BIOUG18664-E01|BSE Malaise Trap|582[0n]|BOLD:ACJ2167  
Phanerotoma anacordobae[[1135]]BIOUG07918-H09|BSE Malaise Trap|658[0n]|BOLD:ACJ2167  
Phanerotoma anacordobae[[1136]]BIOUG18398-F09|BSE Malaise Trap|632[0n]|BOLD:ACJ2167  
Phanerotoma anacordobae[[1137]]BIOUG18398-B04|BSE Malaise Trap|632[0n]|BOLD:ACJ2167  
Phanerotoma anacordobae[[1138]]BIOUG18398-G07|BSE Malaise Trap|632[0n]|BOLD:ACJ2167  
Phanerotoma anacordobae[[1139]]BIOUG17335-B07|BSE Malaise Trap|609[0n]|BOLD:ACJ2167  
Phanerotoma anacordobae[[1140]]BIOUG18290-G07|BSE Malaise Trap|585[0n]|BOLD:ACJ2167  
Phanerotoma alvaroherreraii[[1141]]BIOUG09739-D11|BSE Malaise Trap|591[0n]|BOLD:AAL8247  
Phanerotoma alvaroherreraii[[1142]]BIOUG10247-E11|BSE Malaise Trap|557[0n]|BOLD:AAL8247  
Phanerotoma alvaroherreraii[[1143]]BIOUG18290-D02|BSE Malaise Trap|594[0n]|BOLD:AAL8247  
Phanerotoma alvaroherreraii[[1144]]BIOUG18499-F06|BSE Malaise Trap|549[0n]|BOLD:AAL8247  
Phanerotoma alvaroherreraii[[1145]]BIOUG08348-E03|BSE Malaise Trap|609[0n]|BOLD:AAL8247  
Phanerotoma alvaroherreraii[[1146]]BIOUG09739-C01|BSE Malaise Trap|567[0n]|BOLD:AAL8247  
Phanerotoma alvaroherreraii[[1147]]BIOUG10112-B02|BSE Malaise Trap|591[0n]|BOLD:AAL8247  
Phanerotoma alvaroherreraii[[1148]]BIOUG09739-H08|BSE Malaise Trap|597[0n]|BOLD:AAL8247  
Phanerotoma alvaroherreraii[[1149]]BIOUG18499-D10|BSE Malaise Trap|600[0n]|BOLD:AAL8247  
Phanerotoma alvaroherreraii[[1150]]BIOUG10112-B03|BSE Malaise Trap|557[0n]|BOLD:AAL8247  
Phanerotoma alvaroherreraii[[1151]]BIOUG18290-F11|BSE Malaise Trap|570[0n]|BOLD:AAL8247  
Phanerotoma alvaroherreraii[[1152]]BIOUG10112-E11|BSE Malaise Trap|598[0n]|BOLD:AAL8247  
Phanerotoma alvaroherreraii[[1153]]BIOUG18398-B05|BSE Malaise Trap|628[0n]|BOLD:AAL8247  
Phanerotoma alvaroherreraii[[1154]]BIOUG10016-F02|BSE Malaise Trap|575[0n]|BOLD:AAL8247  
Phanerotoma alvaroherreraii[[1155]]BIOUG18289-H10|BSE Malaise Trap|585[0n]|BOLD:AAL8247  
Phanerotoma alvaroherreraii[[1156]]BIOUG17575-A10|BSE Malaise Trap|555[0n]|BOLD:AAL8247  
Phanerotoma alvaroherreraii[[1157]]BIOUG18397-C11|BSE Malaise Trap|632[0n]|BOLD:AAL8247  
Phanerotoma alvaroherreraii[[1158]]BIOUG07918-F10|BSE Malaise Trap|658[0n]|BOLD:AAL8247  
Phanerotoma alvaroherreraii[[1159]]BIOUG18430-E07|BSE Malaise Trap|632[0n]|BOLD:AAL8247  
Phanerotoma alvaroherreraii[[1160]]BIOUG18290-F04|BSE Malaise Trap|600[0n]|BOLD:AAL8247  
Phanerotoma alvaroherreraii[[1161]]BIOUG18290-A04|BSE Malaise Trap|594[0n]|BOLD:AAL8247  
Phanerotoma alvaroherreraii[[1162]]BIOUG10017-G06|BSE Malaise Trap|557[0n]|BOLD:AAL8247  
Phanerotoma alvaroherreraii[[1163]]BIOUG18499-F05|BSE Malaise Trap|555[0n]|BOLD:AAL8247  
Phanerotoma andydeansi[[1164]]BIOUG28830-H02|Malaise trap PL12-9A|582[0n]|BOLD:ADA7613  
Phanerotoma andydeansi[[1165]]BIOUG28728-H01|Malaise trap PL12-9A|582[0n]|BOLD:ADA7613  
Phanerotoma andydeansi[[1166]]BIOUG29059-D04|Malaise trap PL12-1A|582[0n]|BOLD:ADA7613  
Phanerotoma andydeansi[[1167]]BIOUG29511-G04|Malaise trap PL12-9A|582[0n]|BOLD:ADA7613  
Phanerotoma andydeansi[[1168]]BIOUG29322-E10|Malaise trap PL12-6A|573[0n]|BOLD:ADA7613  
Phanerotoma andydeansi[[1169]]BIOUG29060-G09|Malaise trap PL12-1A|573[0n]|BOLD:ADA7613  
Phanerotoma andydeansi[[1170]]BIOUG29146-E10|Malaise trap PL12-1A|588[0n]|BOLD:ADA7613  
Phanerotoma andydeansi[[1171]]BIOUG29388-H08|Malaise trap PL12-9A|588[0n]|BOLD:ADA7613  
Phanerotoma andydeansi[[1172]]BIOUG29064-E01|Malaise trap PL12-1A|555[2n]|BOLD:ADA7613  
Phanerotoma andydeansi[[1173]]BIOUG28394-F08|Malaise trap PL12-9A|576[0n]|BOLD:ADA7613  
Phanerotoma andydeansi[[1174]]BIOUG29725-C09|Malaise trap PL12-3A|594[0n]|BOLD:ADA7613  
Phanerotoma andydeansi[[1175]]BIOUG28722-F01|Malaise trap PL12-9A|594[0n]|BOLD:ADA7613  
Phanerotoma andydeansi[[1176]]BIOUG28764-F10|Malaise trap PL12-1A|594[0n]|BOLD:ADA7613  
Phanerotoma andydeansi[[1177]]BIOUG28766-E08|Malaise trap PL12-1A|594[0n]|BOLD:ADA7613  
Phanerotoma andydeansi[[1178]]BIOUG28673-C05|Malaise trap PL12-9A|594[0n]|BOLD:ADA7613

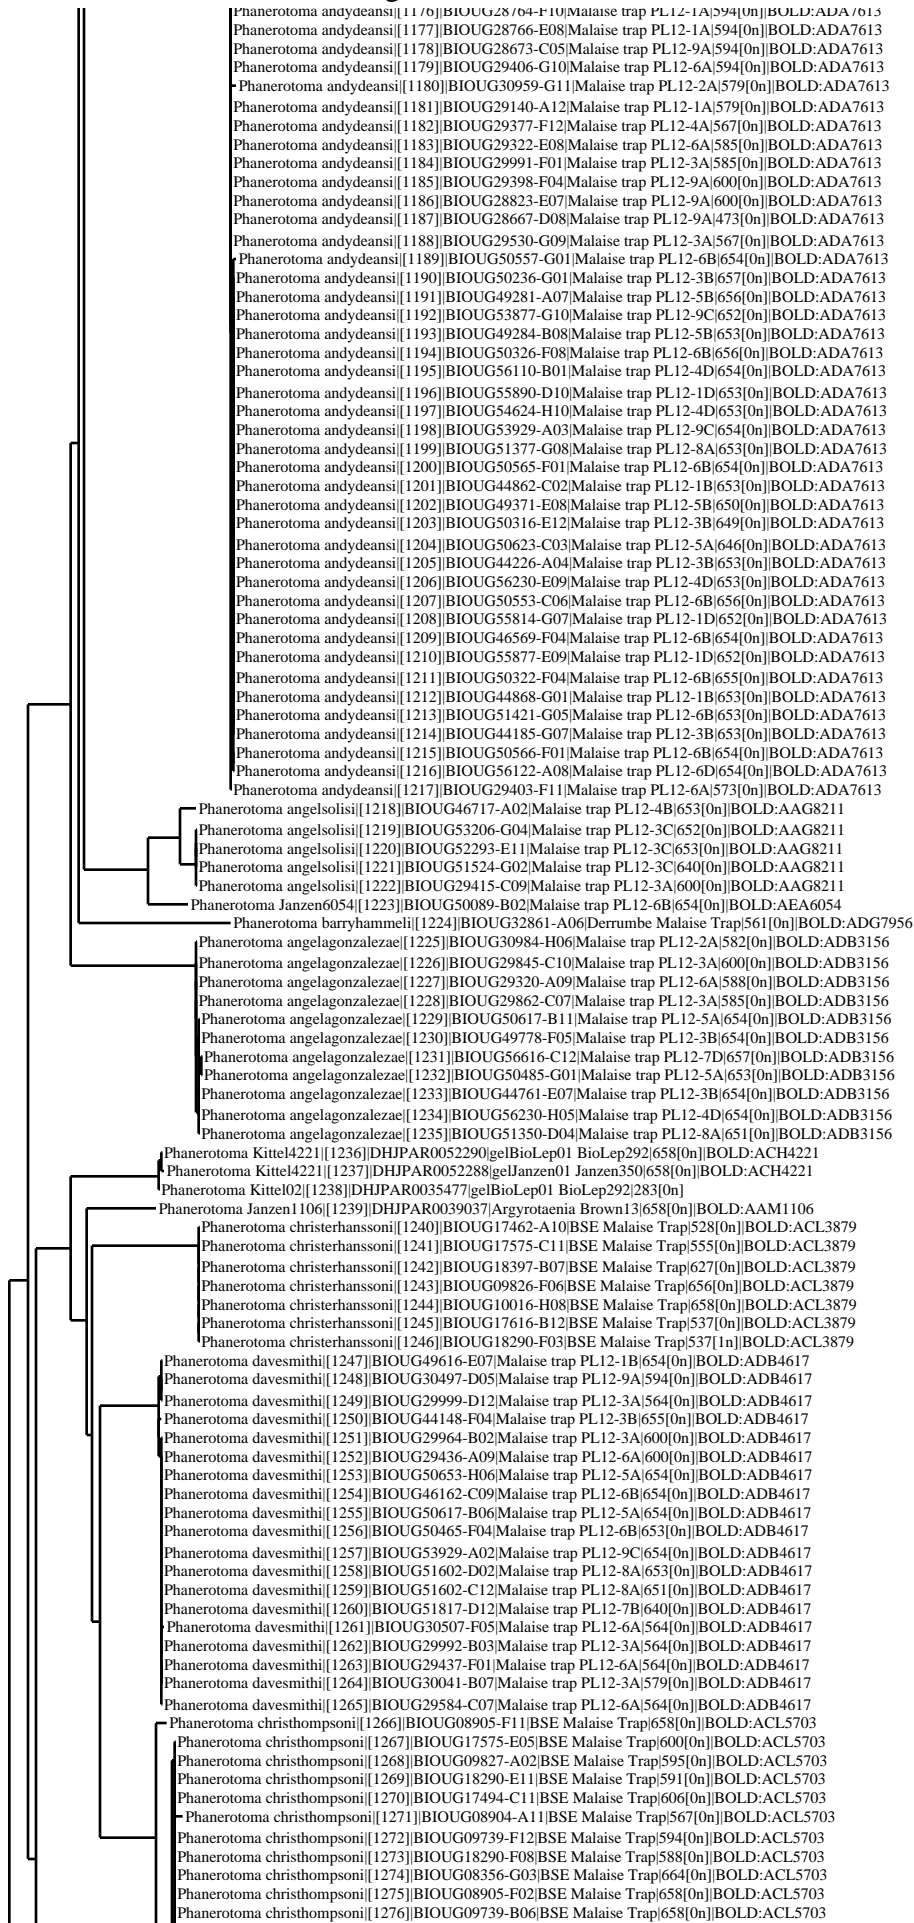

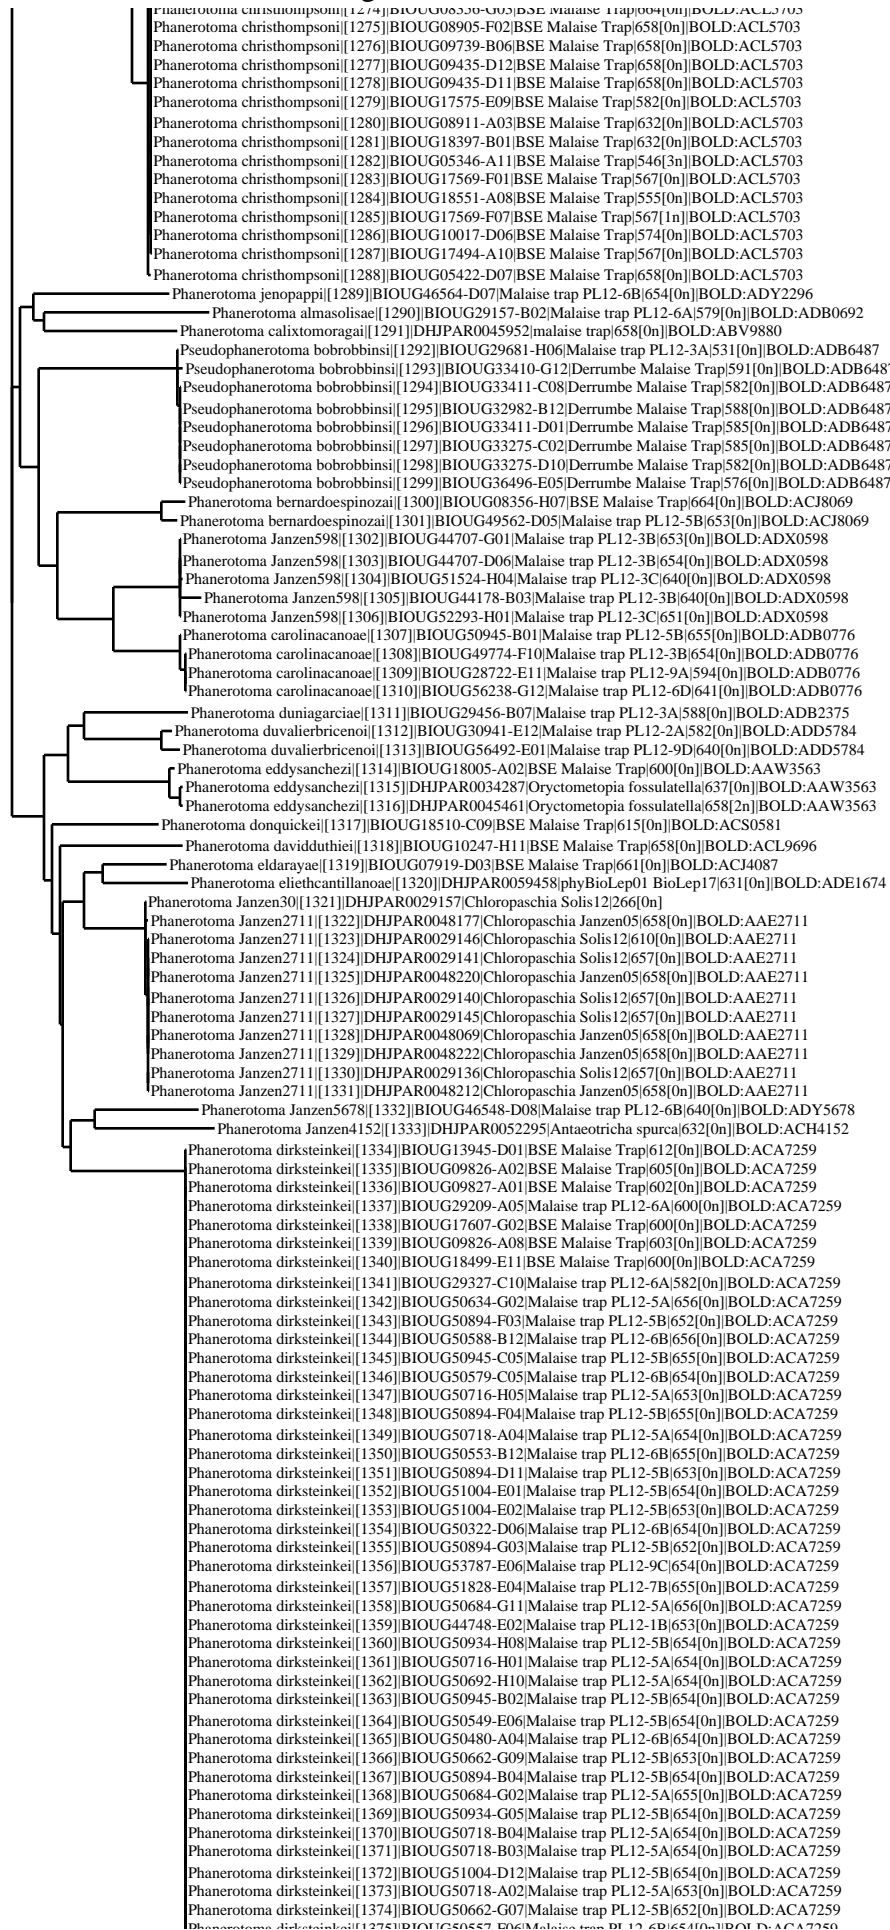

Phanerotoma dirksteinkei[1373]BIOUG50718-A02|Malaise trap PL12-5A|653[0n]|BOLD:ACA7259  
Phanerotoma dirksteinkei[1374]BIOUG50662-G07|Malaise trap PL12-5B|652[0n]|BOLD:ACA7259  
Phanerotoma dirksteinkei[1375]BIOUG50557-F06|Malaise trap PL12-6B|654[0n]|BOLD:ACA7259  
Phanerotoma dirksteinkei[1376]BIOUG50894-D07|Malaise trap PL12-5B|653[0n]|BOLD:ACA7259  
Phanerotoma dirksteinkei[1377]BIOUG50945-B08|Malaise trap PL12-5B|654[0n]|BOLD:ACA7259  
Phanerotoma dirksteinkei[1378]BIOUG50634-F09|Malaise trap PL12-5A|655[0n]|BOLD:ACA7259  
Phanerotoma dirksteinkei[1379]BIOUG50942-F01|Malaise trap PL12-5B|654[0n]|BOLD:ACA7259  
Phanerotoma dirksteinkei[1380]BIOUG50716-F12|Malaise trap PL12-5A|655[0n]|BOLD:ACA7259  
Phanerotoma dirksteinkei[1381]BIOUG44371-G09|Malaise trap PL12-3B|654[0n]|BOLD:ACA7259  
Phanerotoma dirksteinkei[1382]BIOUG44362-A04|Malaise trap PL12-3B|654[0n]|BOLD:ACA7259  
Phanerotoma dirksteinkei[1383]BIOUG50716-G03|Malaise trap PL12-5A|655[0n]|BOLD:ACA7259  
Phanerotoma dirksteinkei[1384]BIOUG50942-E11|Malaise trap PL12-5B|655[0n]|BOLD:ACA7259  
Phanerotoma dirksteinkei[1385]BIOUG18330-D05|BSE Malaise Trap|630[0n]|BOLD:ACA7259  
Phanerotoma dirksteinkei[1386]BIOUG18748-E11|BSE Malaise Trap|628[0n]|BOLD:ACA7259  
Phanerotoma dirksteinkei[1387]BIOUG18665-F09|BSE Malaise Trap|594[0n]|BOLD:ACA7259  
Phanerotoma dirksteinkei[1388]BIOUG18660-H05|BSE Malaise Trap|594[0n]|BOLD:ACA7259  
Phanerotoma dirksteinkei[1389]BIOUG17967-C02|BSE Malaise Trap|594[0n]|BOLD:ACA7259  
Phanerotoma dirksteinkei[1390]BIOUG18665-C07|BSE Malaise Trap|594[0n]|BOLD:ACA7259  
Phanerotoma dirksteinkei[1391]BIOUG18661-F05|BSE Malaise Trap|594[0n]|BOLD:ACA7259  
Phanerotoma dirksteinkei[1392]BIOUG50934-H10|Malaise trap PL12-5B|653[0n]|BOLD:ACA7259  
Phanerotoma dirksteinkei[1393]BIOUG09738-H03|BSE Malaise Trap|658[0n]|BOLD:ACA7259  
Phanerotoma dirksteinkei[1394]BIOUG09740-D01|BSE Malaise Trap|658[0n]|BOLD:ACA7259  
Phanerotoma dirksteinkei[1395]BIOUG50578-F11|Malaise trap PL12-6B|657[0n]|BOLD:ACA7259  
Phanerotoma dirksteinkei[1396]BIOUG09740-A03|BSE Malaise Trap|658[0n]|BOLD:ACA7259  
Phanerotoma dirksteinkei[1397]BIOUG29490-E11|Malaise trap PL12-6A|573[0n]|BOLD:ACA7259  
Phanerotoma dirksteinkei[1398]BIOUG17608-B03|BSE Malaise Trap|588[0n]|BOLD:ACA7259  
Phanerotoma dirksteinkei[1399]BIOUG09442-B05|BSE Malaise Trap|633[0n]|BOLD:ACA7259  
Phanerotoma dirksteinkei[1400]BIOUG18661-E02|BSE Malaise Trap|588[0n]|BOLD:ACA7259  
Phanerotoma dirksteinkei[1401]BIOUG17566-G05|BSE Malaise Trap|603[0n]|BOLD:ACA7259  
Phanerotoma dirksteinkei[1402]BIOUG13945-B10|BSE Malaise Trap|588[0n]|BOLD:ACA7259  
Phanerotoma dirksteinkei[1403]BIOUG29322-F05|Malaise trap PL12-6A|588[0n]|BOLD:ACA7259  
Phanerotoma dirksteinkei[1404]BIOUG29212-G12|Malaise trap PL12-6A|588[0n]|BOLD:ACA7259  
Phanerotoma dirksteinkei[1405]BIOUG29320-B09|Malaise trap PL12-6A|588[0n]|BOLD:ACA7259  
Phanerotoma dirksteinkei[1406]BIOUG18661-F04|BSE Malaise Trap|588[0n]|BOLD:ACA7259  
Phanerotoma dirksteinkei[1407]BIOUG29327-C06|Malaise trap PL12-6A|588[0n]|BOLD:ACA7259  
Phanerotoma dirksteinkei[1408]BIOUG10017-A10|BSE Malaise Trap|577[0n]|BOLD:ACA7259  
Phanerotoma dirksteinkei[1409]BIOUG17520-A12|BSE Malaise Trap|591[0n]|BOLD:ACA7259  
Phanerotoma dirksteinkei[1410]BIOUG18661-A05|BSE Malaise Trap|576[0n]|BOLD:ACA7259  
Phanerotoma dirksteinkei[1411]BIOUG50578-F10|Malaise trap PL12-6B|640[0n]|BOLD:ACA7259  
Phanerotoma dirksteinkei[1412]BIOUG29401-C07|Malaise trap PL12-6A|576[0n]|BOLD:ACA7259  
Phanerotoma dirksteinkei[1413]BIOUG18290-H03|BSE Malaise Trap|576[0n]|BOLD:ACA7259  
Phanerotoma dirksteinkei[1414]BIOUG29403-F10|Malaise trap PL12-6A|546[1n]|BOLD:ACA7259  
Phanerotoma dirksteinkei[1415]BIOUG18290-D05|BSE Malaise Trap|576[0n]|BOLD:ACA7259  
Phanerotoma dirksteinkei[1416]BIOUG50945-C11|Malaise trap PL12-5B|655[0n]|BOLD:ACA7259  
Phanerotoma dirksteinkei[1417]BIOUG17550-F01|BSE Malaise Trap|585[0n]|BOLD:ACA7259  
Phanerotoma dirksteinkei[1418]BIOUG29320-A11|Malaise trap PL12-6A|579[0n]|BOLD:ACA7259  
Phanerotoma dirksteinkei[1419]BIOUG29322-E03|Malaise trap PL12-6A|579[0n]|BOLD:ACA7259  
Phanerotoma dirksteinkei[1420]BIOUG29831-C08|Malaise trap PL12-3A|577[0n]|BOLD:ACA7259  
Phanerotoma dirksteinkei[1421]BIOUG18664-C06|BSE Malaise Trap|567[0n]|BOLD:ACA7259  
Phanerotoma dirksteinkei[1422]BIOUG29403-F12|Malaise trap PL12-6A|567[0n]|BOLD:ACA7259  
Phanerotoma dirksteinkei[1423]BIOUG44241-A05|Malaise trap PL12-3B|640[0n]|BOLD:ACA7259  
Phanerotoma dirksteinkei[1424]BIOUG50894-C06|Malaise trap PL12-5B|645[0n]|BOLD:ACA7259  
Phanerotoma dirksteinkei[1425]BIOUG13945-A09|BSE Malaise Trap|540[0n]|BOLD:ACA7259  
Phanerotoma dirksteinkei[1426]BIOUG29403-F09|Malaise trap PL12-6A|546[0n]|BOLD:ACA7259  
Phanerotoma dirksteinkei[1427]BIOUG18664-H09|BSE Malaise Trap|555[0n]|BOLD:ACA7259  
Phanerotoma dirksteinkei[1428]BIOUG18665-G01|BSE Malaise Trap|558[0n]|BOLD:ACA7259  
Phanerotoma dirksteinkei[1429]BIOUG29322-E04|Malaise trap PL12-6A|567[0n]|BOLD:ACA7259  
Phanerotoma dirksteinkei[1430]BIOUG09827-B03|BSE Malaise Trap|597[0n]|BOLD:ACA7259  
Phanerotoma dirksteinkei[1431]BIOUG50716-G08|Malaise trap PL12-5A|657[0n]|BOLD:ACA7259  
Phanerotoma dirksteinkei[1432]BIOUG18661-B01|BSE Malaise Trap|567[0n]|BOLD:ACA7259  
Phanerotoma dirksteinkei[1433]BIOUG29401-C04|Malaise trap PL12-6A|537[0n]|BOLD:ACA7259  
Phanerotoma dirksteinkei[1434]BIOUG50976-A10|Malaise trap PL12-5B|654[0n]|BOLD:ACA7259  
Phanerotoma dirksteinkei[1435]BIOUG50686-H08|Malaise trap PL12-5A|655[0n]|BOLD:ACA7259  
Phanerotoma dirksteinkei[1436]BIOUG50942-E10|Malaise trap PL12-5B|656[0n]|BOLD:ACA7259  
Pseudophanerotoma allisonbrownae[1437]BIOUG07616-H01|BSE Malaise Trap|572[0n]|BOLD:ACJ2201  
Pseudophanerotoma allisonbrownae[1438]BIOUG07918-H11|BSE Malaise Trap|658[0n]|BOLD:ACJ2201  
Pseudophanerotoma albanjimenezii[1439]DHJPAR0040083|Episimus ortygia|655[0n]|BOLD:AAV8843  
Pseudophanerotoma albanjimenezii[1440]DHJPAR0055207|Episimus ortygia|658[0n]|BOLD:AAV8843  
Pseudophanerotoma albanjimenezii[1441]DHJPAR0048279|Episimus ortygia|658[0n]|BOLD:AAV8843  
Pseudophanerotoma Janzen9783[1442]DHJPAR0055200|unknown|658[0n]|BOLD:ACM9783  
Pseudophanerotoma Janzen9809[1443]BIOUG49616-D12|Malaise trap PL12-1B|650[0n]|BOLD:ADZ9809  
Pseudophanerotoma Janzen9809[1444]BIOUG49624-A08|Malaise trap PL12-1B|652[0n]|BOLD:ADZ9809  
Pseudophanerotoma alanflemingii[1445]BIOUG28722-F02|Malaise trap PL12-9A|600[0n]|BOLD:ACL3198  
Pseudophanerotoma alanflemingii[1446]BIOUG52084-C04|Malaise trap PL12-9B|651[0n]|BOLD:ACL3198  
Pseudophanerotoma alanflemingii[1447]BIOUG09826-G03|BSE Malaise Trap|658[0n]|BOLD:ACL3198  
Pseudophanerotoma alexsmithii[1448]DHJPAR0049473|Cosmorrhyncha albistrigulana|653[0n]|BOLD:AC...  
Pseudophanerotoma alexsmithii[1449]DHJPAR0049430|Cosmorrhyncha albistrigulana|658[0n]|BOLD:AC...  
Pseudophanerotoma alexsmithii[1450]DHJPAR0049453|Cosmorrhyncha albistrigulana|658[0n]|BOLD:AC...  
Pseudophanerotoma alexsmithii[1451]DHJPAR0049461|Cosmorrhyncha albistrigulana|658[0n]|BOLD:AC...  
Pseudophanerotoma alexsmithii[1452]DHJPAR0049458|Cosmorrhyncha albistrigulana|658[0n]|BOLD:AC...  
Pseudophanerotoma alexsmithii[1453]DHJPAR0049462|Cosmorrhyncha albistrigulana|658[0n]|BOLD:AC...  
Pseudophanerotoma alexsmithii[1454]DHJPAR0049463|Cosmorrhyncha albistrigulana|658[0n]|BOLD:AC...  
Pseudophanerotoma alexsmithii[1455]DHJPAR0049460|Cosmorrhyncha albistrigulana|658[0n]|BOLD:AC...  
Pseudophanerotoma alexsmithii[1456]DHJPAR0049444|Cosmorrhyncha albistrigulana|658[0n]|BOLD:AC...  
Pseudophanerotoma alexsmithii[1457]DHJPAR0055300|Cosmorrhyncha albistrigulana|658[0n]|BOLD:AC...  
Pseudophanerotoma alexsmithii[1458]DHJPAR0049452|Cosmorrhyncha albistrigulana|658[0n]|BOLD:AC...  
Pseudophanerotoma alexsmithii[1459]DHJPAR0049445|Cosmorrhyncha albistrigulana|658[0n]|BOLD:AC...  
Pseudophanerotoma alexsmithii[1460]DHJPAR0049459|Cosmorrhyncha albistrigulana|658[0n]|BOLD:AC...  
Pseudophanerotoma alexsmithii[1461]DHJPAR0049450|Cosmorrhyncha albistrigulana|658[0n]|BOLD:AC...  
Pseudophanerotoma alexsmithii[1462]DHJPAR0049466|Cosmorrhyncha albistrigulana|658[0n]|BOLD:AC...  
Pseudophanerotoma alexsmithii[1463]DHJPAR0049441|Cosmorrhyncha albistrigulana|658[0n]|BOLD:AC...  
Pseudophanerotoma alexsmithii[1464]DHJPAR0055194|Cosmorrhyncha albistrigulana|658[0n]|BOLD:AC...  
Pseudophanerotoma alexsmithii[1465]DHJPAR0049456|Cosmorrhyncha albistrigulana|658[0n]|BOLD:AC...  
Pseudophanerotoma alexsmithii[1466]DHJPAR0049443|Cosmorrhyncha albistrigulana|658[0n]|BOLD:AC...  
Pseudophanerotoma alejandromarini[1467]BIOUG56359-E05|Malaise trap PL12-9D|650[0n]|BOLD:ACE1984  
Pseudophanerotoma alejandromarini[1468]BIOUG28669-E05|Malaise trap PL12-9A|597[0n]|BOLD:ACE1984  
Pseudophanerotoma alejandromarini[1469]BIOUG29577-D11|Malaise trap PL12-9A|573[0n]|BOLD:ACE1984  
Pseudophanerotoma alejandromarini[1470]BIOUG28388-B02|Malaise trap PL12-9X|585[0n]|BOLD:ACE1984  
Pseudophanerotoma alejandromarini[1471]BIOUG29507-E10|Malaise trap PL12-9A|552[0n]|BOLD:ACE1984
