# Supplementary material for: Minimalist revision and description of 403 new species in 11 subfamilies of Costa Rican braconid parasitoid wasps, including host records for 219 species
Source: PubMed Central journal article supplement (PMC8390796; doi:10.3897/zookeys.1013.55600), 2021-02-02
Supplement: zookeys-1013-001-s004.pdf [file zookeys-1013-001-s004.pdf]

## 4. Homolobinae BOLD TaxonID Tree

Title : Tree Result - Search: Sample IDs (99 records returned) (99 records selected)

Date : 17-Nov-2020

Data Type : Nucleotide

Distance Model : Kimura 2 Parameter

Marker : COI-5P

Colourization : [blue]=Stop Codons [red]=Contamination or misidentification

  

Label : Sample ID

Label : Taxon

Label : Extra Info

Label : Sequence Length

Label : Barcode Cluster (BIN)

  

Filter : exclude records with stop codons

  

Sequence Count : 90

Species count : 6

Genus count : 2

Family count : 1

Unidentified : 0

  

BIN Count : 6

Homolobus Janzen12[1][DHJP0035530]Pherotesia minusca[658[0n]]BOLD:AAA7060

Exasticolus robertofernanzezi[2][DHJP0023538]Lophocampa modestaDHJ01[657[0n]]BOLD:AAA5869

Exasticolus robertofernanzezi[3][DHJP0036316]Lophocampa modesta[658[0n]]BOLD:AAA5869

Exasticolus robertofernanzezi[4][DHJP0029329]Viviennea tegyra[657[0n]]BOLD:AAA5869

Exasticolus robertofernanzezi[5][DHJP0016440]Lophocampa modesta[657[0n]]BOLD:AAA5869

Exasticolus robertofernanzezi[6][DHJP0021127]Lophocampa modesta[657[0n]]BOLD:AAA5869

Exasticolus robertofernanzezi[7][DHJP0029185]Viviennea tegyra[657[0n]]BOLD:AAA5869

Exasticolus robertofernanzezi[8][DHJP0036313]Lophocampa modesta[658[0n]]BOLD:AAA5869

Exasticolus robertofernanzezi[9][DHJP0021133]Lophocampa modesta[657[0n]]BOLD:AAA5869

Exasticolus robertofernanzezi[10][DHJP0029331]Lophocampa maroniensis[657[0n]]BOLD:AAA5869

Exasticolus robertofernanzezi[11][DHJP0023542]Lophocampa modestaDHJ01[657[0n]]BOLD:AAA5869

Exasticolus robertofernanzezi[12][DHJP0016439]Lophocampa modesta[657[0n]]BOLD:AAA5869

Exasticolus robertofernanzezi[13][DHJP0023539]Lophocampa modestaDHJ01[657[0n]]BOLD:AAA5869

Exasticolus robertofernanzezi[14][DHJP0029333]Lophocampa maroniensis[657[1n]]BOLD:AAA5869

Exasticolus robertofernanzezi[15][DHJP0037963]Ormetica sicilia[658[0n]]BOLD:AAA5869

Exasticolus robertofernanzezi[16][DHJP0029396]Ormetica ataenia[657[0n]]BOLD:AAA5869

Exasticolus robertofernanzezi[17][DHJP0029334]Lophocampa maroniensis[657[0n]]BOLD:AAA5869

Exasticolus robertofernanzezi[18][DHJP0036314]Lophocampa modesta[658[0n]]BOLD:AAA5869

Exasticolus robertofernanzezi[19][DHJP0016437]Lophocampa modesta[657[0n]]BOLD:AAA5869

Exasticolus robertofernanzezi[20][DHJP0029328]Viviennea tegyra[657[0n]]BOLD:AAA5869

Exasticolus robertofernanzezi[21][DHJP0029395]Ormetica ataenia[657[0n]]BOLD:AAA5869

Exasticolus robertofernanzezi[22][DHJP0021124]Lophocampa modesta[657[0n]]BOLD:AAA5869

Exasticolus robertofernanzezi[23][DHJP0036312]Lophocampa modesta[658[0n]]BOLD:AAA5869

Exasticolus robertofernanzezi[24][DHJP0029327]Viviennea tegyra[657[0n]]BOLD:AAA5869

Exasticolus robertofernanzezi[25][DHJP0016438]Lophocampa modesta[657[0n]]BOLD:AAA5869

Exasticolus robertofernanzezi[26][DHJP0023544]Lophocampa modestaDHJ01[657[0n]]BOLD:AAA5869

Exasticolus robertofernanzezi[27][DHJP0021128]Lophocampa modesta[660[0n]]BOLD:AAA5869

Exasticolus robertofernanzezi[28][DHJP0029335]Lophocampa maroniensis[633[0n]]BOLD:AAA5869

Exasticolus robertofernanzezi[29][DHJP0023537]Lophocampa modestaDHJ01[631[0n]]BOLD:AAA5869

Exasticolus robertofernanzezi[30][DHJP0023540]Lophocampa modestaDHJ01[631[0n]]BOLD:AAA5869

Exasticolus robertofernanzezi[31][DHJP0023545]Lophocampa modestaDHJ01[631[0n]]BOLD:AAA5869

Exasticolus robertofernanzezi[32][DHJP0021125]Lophocampa modesta[657[0n]]BOLD:AAA5869

Exasticolus robertofernanzezi[33][DHJP0029394]Ormetica ataenia[657[0n]]BOLD:AAA5869

Exasticolus robertofernanzezi[34][DHJP0023543]Lophocampa modestaDHJ01[657[0n]]BOLD:AAA5869

Exasticolus robertofernanzezi[35][DHJP0055433]Ormetica sicilia[658[0n]]BOLD:AAA5869

Exasticolus robertofernanzezi[36][DHJP0023546]Lophocampa modestaDHJ01[657[0n]]BOLD:AAA5869

Exasticolus robertofernanzezi[37][DHJP0029399]Ormetica ataenia[657[2n]]BOLD:AAA5869

Exasticolus robertofernanzezi[38][DHJP0029401]Ormetica sicilia[632[0n]]BOLD:AAA5869

Exasticolus robertofernanzezi[39][DHJP0029400]Ormetica sicilia[657[0n]]BOLD:AAA5869

Exasticolus robertofernanzezi[40][DHJP0029402]Ormetica sicilia[657[0n]]BOLD:AAA5869

Exasticolus robertofernanzezi[41][DHJP0021126]Lophocampa modesta[657[0n]]BOLD:AAA5869

Exasticolus robertofernanzezi[42][DHJP0021107]Lophocampa modesta[657[0n]]BOLD:AAA5869

Exasticolus robertofernanzezi[43][DHJP0029330]Lophocampa maroniensis[657[0n]]BOLD:AAA5869

Exasticolus robertofernanzezi[44][DHJP0021108]Lophocampa modesta[654[0n]]BOLD:AAA5869

Exasticolus robertofernanzezi[45][DHJP0023536]Lophocampa modestaDHJ01[657[0n]]BOLD:AAA5869

Exasticolus robertofernanzezi[46][DHJP0029397]Ormetica ataenia[657[1n]]BOLD:AAA5869

Exasticolus robertofernanzezi[47][DHJP0023541]Lophocampa modestaDHJ01[626[0n]]BOLD:AAA5869

Exasticolus robertofernanzezi[48][DHJP0036315]Lophocampa modesta[658[0n]]BOLD:AAA5869

Exasticolus robertofernanzezi[49][DHJP0022100]Lophocampa modesta[657[1n]]BOLD:AAA5869

Exasticolus robertofernanzezi[50][DHJP0022103]Lophocampa modesta[657[0n]]BOLD:AAA5869

Exasticolus robertofernanzezi[51][DHJP0022102]Lophocampa modesta[657[0n]]BOLD:AAA5869

Exasticolus robertofernanzezi[52][DHJP0022101]Lophocampa modesta[657[0n]]BOLD:AAA5869

Exasticolus robertofernanzezi[53][DHJP0022194]Hemiceras Janzen07DHJ02[658[0n]]BOLD:AAA5869

Exasticolus robertofernanzezi[54][DHJP0022114]Lophocampa modesta[657[0n]]BOLD:AAA5869

Exasticolus robertofernanzezi[55][DHJP0022104]Lophocampa modesta[657[0n]]BOLD:AAA5869

Exasticolus robertofernanzezi[56][DHJP0022107]Lophocampa modesta[626[2n]]BOLD:AAA5869

Exasticolus robertofernanzezi[57][DHJP0022109]Lophocampa modesta[626[0n]]BOLD:AAA5869

Exasticolus robertofernanzezi[58][DHJP0022108]Lophocampa modesta[626[0n]]BOLD:AAA5869

Exasticolus robertofernanzezi[59][DHJP0022105]Lophocampa modesta[657[0n]]BOLD:AAA5869

Exasticolus robertofernanzezi[60][DHJP0022099]Lophocampa modesta[657[0n]]BOLD:AAA5869

Exasticolus robertofernanzezi[61][DHJP0016441]Lophocampa modesta[643[4n]]BOLD:AAA5869

Exasticolus robertofernanzezi[62][DHJP0023344]Ormetica sicilia[626[0n]]BOLD:AAA5869

Exasticolus robertofernanzezi[63][DHJP0023348]Ormetica sicilia[630[0n]]BOLD:AAA5869

Exasticolus robertofernanzezi[64][DHJP0023349]Ormetica sicilia[623[0n]]BOLD:AAA5869

Exasticolus robertofernanzezi[65][DHJP0023350]Ormetica sicilia[631[0n]]BOLD:AAA5869

Exasticolus robertofernanzezi[66][DHJP0023347]Ormetica sicilia[631[0n]]BOLD:AAA5869

Exasticolus robertofernanzezi[67][DHJP0023345]Ormetica sicilia[630[0n]]BOLD:AAA5869

Exasticolus robertofernanzezi[68][DHJP0023346]Ormetica sicilia[626[0n]]BOLD:AAA5869

Exasticolus robertofernanzezi[69][DHJP0023343]Ormetica sicilia[618[5n]]BOLD:AAA5869

Exasticolus jennyphillipsae[70][DHJP0028118]noto 08-SRNP-35960[631[0n]]BOLD:AAW1602

Exasticolus sigifredomarinii[71][DHJP00061471]Malocampa matralis[658[0n]]BOLD:ACM4428

Exasticolus sigifredomarinii[72][DHJP00054460]Malocampa matralis[658[0n]]BOLD:ACM4428

Exasticolus sigifredomarinii[73][DHJP0029336]Sericochroa felderi[425[0n]]BOLD:ACM4428

Exasticolus randalgarciari[74][DHJP00054461]Leptostales angulataDHJ01[658[0n]]BOLD:ACM4427

Exasticolus tomlewinsonii[75]BIOUG55367-D12[Malaise trap PL12-2D][653[0n]]BOLD:ADB0948

Exasticolus tomlewinsonii[76]BIOUG51395-F03[Malaise trap PL12-8A][652[0n]]BOLD:ADB0948

Exasticolus tomlewinsonii[77]BIOUG55250-E03[Malaise trap PL12-4D][652[0n]]BOLD:ADB0948

Exasticolus tomlewinsonii[78]BIOUG44433-E05[Malaise trap PL12-3B][653[0n]]BOLD:ADB0948

Exasticolus tomlewinsonii[79]BIOUG48398-F09[Malaise trap PL12-5A][653[0n]]BOLD:ADB0948

Exasticolus tomlewinsonii[80]BIOUG55303-H07[Malaise trap PL12-4D][654[0n]]BOLD:ADB0948

Exasticolus tomlewinsonii[81]BIOUG55303-A12[Malaise trap PL12-4D][655[0n]]BOLD:ADB0948

Exasticolus tomlewinsonii[82]BIOUG55306-E01[Malaise trap PL12-4D][655[0n]]BOLD:ADB0948

Exasticolus tomlewinsonii[83]BIOUG55306-G10[Malaise trap PL12-4D][653[0n]]BOLD:ADB0948

Exasticolus tomlewinsonii[84]BIOUG55306-G11[Malaise trap PL12-4D][654[0n]]BOLD:ADB0948

Exasticolus tomlewinsonii[85]BIOUG28731-F03[Malaise trap PL12-7A][588[0n]]BOLD:ADB0948

Exasticolus tomlewinsonii[86]BIOUG28731-E04[Malaise trap PL12-7A][588[0n]]BOLD:ADB0948

Exasticolus tomlewinsonii[87]BIOUG29043-D07[Malaise trap PL12-3A][588[0n]]BOLD:ADB0948

Exasticolus tomlewinsonii[88]BIOUG28713-H02[Malaise trap PL12-6A][588[0n]]BOLD:ADB0948

Exasticolus tomlewinsonii[89]BIOUG28817-F06[Malaise trap PL12-7A][588[0n]]BOLD:ADB0948

Exasticolus tomlewinsonii[90]BIOUG28408-A02[Malaise trap PL12-4A][588[0n]]BOLD:ADB0948
