# Supplementary material for: Minimalist revision and description of 403 new species in 11 subfamilies of Costa Rican braconid parasitoid wasps, including host records for 219 species
Source: PubMed Central journal article supplement (PMC8390796; doi:10.3897/zookeys.1013.55600), 2021-02-02
Supplement: zookeys-1013-001-s008.pdf [file zookeys-1013-001-s008.pdf]

## 8. Orgilinae BOLD TaxonID Tree

Title : Tree Result - Search: Sample IDs (228 records returned) (228 records selected)

Date : 17-Nov-2020

Data Type : Nucleotide

Distance Model : Kimura 2 Parameter

Marker : COI-5P

Colourization : [blue]=Stop Codons [red]=Contamination or misidentification

  

Label : Sample ID

Label : Taxon

Label : Extra Info

Label : Sequence Length

Label : Barcode Cluster (BIN)

  

Filter : exclude records with stop codons

  

Sequence Count : 221

Species count : 47

Genus count : 2

Family count : 1

Unidentified : 1

  

BIN Count : 47

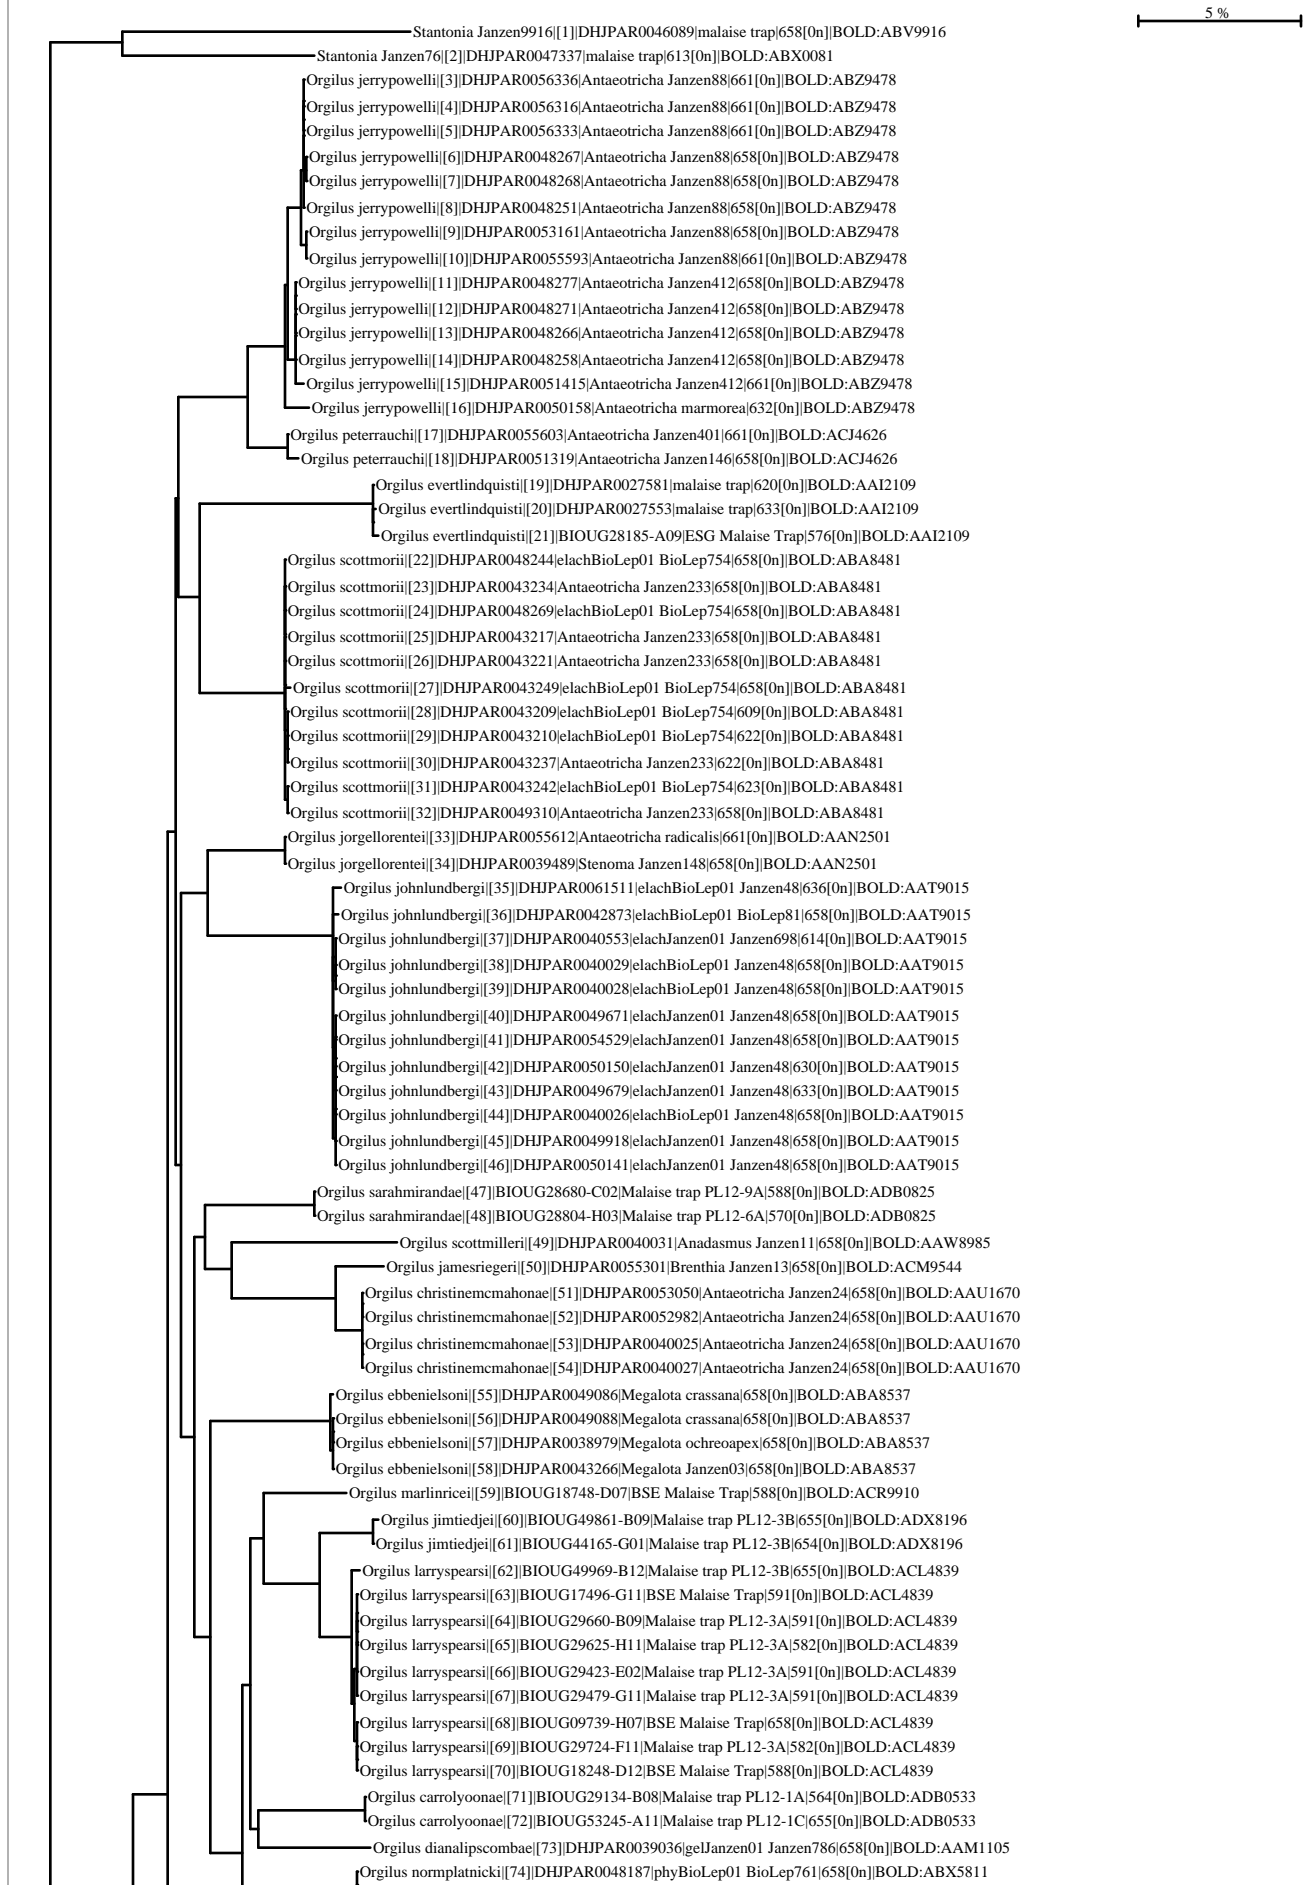

Orgilus dianalipscombae[[73]]DHJPAR0039036[gelJanzen01 Janzen786|658[0n]]BOLD:AAM1105  
 Orgilus normplatnicki[[74]]DHJPAR0048187[phyBioLep01 BioLep761|658[0n]]BOLD:ABX5811  
 Orgilus normplatnicki[[75]]DHJPAR0048166[phyBioLep01 BioLep761|658[0n]]BOLD:ABX5811  
 Orgilus normplatnicki[[76]]DHJPAR0045298[phyBioLep01 BioLep761|658[2n]]BOLD:ABX5811  
 Orgilus elizabethpennisiae[[77]]DHJPAR0051816[Inga Janzen61|633[0n]]BOLD:AAW8981  
 Orgilus elizabethpennisiae[[78]]DHJPAR0049346[Inga Janzen61|658[0n]]BOLD:AAW8981  
 Orgilus elizabethpennisiae[[79]]DHJPAR0049268[Inga Janzen61|658[0n]]BOLD:AAW8981  
 Orgilus elizabethpennisiae[[80]]DHJPAR0049325[Inga Janzen61|658[0n]]BOLD:AAW8981  
 Orgilus elizabethpennisiae[[81]]DHJPAR0049270[Inga Janzen61|658[0n]]BOLD:AAW8981  
 Orgilus elizabethpennisiae[[82]]DHJPAR0049324[Inga Janzen61|658[0n]]BOLD:AAW8981  
 Orgilus elizabethpennisiae[[83]]DHJPAR0049335[Inga Janzen61|658[0n]]BOLD:AAW8981  
 Orgilus elizabethpennisiae[[84]]DHJPAR0049289[Inga Janzen61|658[0n]]BOLD:AAW8981  
 Orgilus elizabethpennisiae[[85]]DHJPAR0051911[Inga Janzen61|658[0n]]BOLD:AAW8981  
 Orgilus elizabethpennisiae[[86]]DHJPAR0051833[Inga Janzen61|661[0n]]BOLD:AAW8981  
 Orgilus elizabethpennisiae[[87]]DHJPAR0040551[Inga Janzen61|644[0n]]BOLD:AAW8981  
 Orgilus elizabethpennisiae[[88]]DHJPAR0052341[Antaeotricha Janzen40|621[0n]]BOLD:AAW8981  
 Orgilus elizabethpennisiae[[89]]DHJPAR0049368[Inga Janzen61|658[0n]]BOLD:AAW8981  
 Orgilus elizabethpennisiae[[90]]DHJPAR0049322[Inga Janzen61|658[0n]]BOLD:AAW8981  
 Orgilus elizabethpennisiae[[91]]DHJPAR0056063[Inga Janzen61|670[0n]]BOLD:AAW8981  
 Orgilus elizabethpennisiae[[92]]DHJPAR0049293[Inga Janzen61|658[0n]]BOLD:AAW8981  
 Orgilus elizabethpennisiae[[93]]DHJPAR0049309[Inga Janzen61|658[0n]]BOLD:AAW8981  
 Orgilus elizabethpennisiae[[94]]DHJPAR0049344[Inga Janzen61|658[0n]]BOLD:AAW8981  
 Orgilus elizabethpennisiae[[95]]DHJPAR0049282[Inga Janzen61|658[0n]]BOLD:AAW8981  
 Orgilus elizabethpennisiae[[96]]DHJPAR0053200[Inga Janzen61|658[0n]]BOLD:AAW8981  
 Orgilus elizabethpennisiae[[97]]DHJPAR0049357[Inga Janzen61|658[0n]]BOLD:AAW8981  
 Orgilus elizabethpennisiae[[98]]DHJPAR0049255[Inga Janzen61|658[0n]]BOLD:AAW8981  
 Orgilus elizabethpennisiae[[99]]DHJPAR0049327[Inga Janzen61|658[0n]]BOLD:AAW8981  
 Orgilus elizabethpennisiae[[100]]DHJPAR0049386[Inga Janzen61|658[0n]]BOLD:AAW8981  
 Orgilus elizabethpennisiae[[101]]DHJPAR0052328[Antaeotricha Janzen40|612[0n]]BOLD:AAW8981  
 Orgilus elizabethpennisiae[[102]]DHJPAR0049469[Inga Janzen61|658[0n]]BOLD:AAW8981  
 Orgilus elizabethpennisiae[[103]]DHJPAR0056845[Inga Janzen61|658[0n]]BOLD:AAW8981  
 Orgilus elizabethpennisiae[[104]]DHJPAR0049378[Inga Janzen61|658[0n]]BOLD:AAW8981  
 Orgilus elizabethpennisiae[[105]]DHJPAR0056033[Inga Janzen61|670[0n]]BOLD:AAW8981  
 Orgilus elizabethpennisiae[[106]]DHJPAR0049299[Inga Janzen61|658[0n]]BOLD:AAW8981  
 Orgilus christompsoni[[107]]BIOUG51625-H11[Malaise trap PL12-2B|651[0n]]BOLD:ADW2886  
 Orgilus christompsoni[[108]]BIOUG44707-C12[Malaise trap PL12-3B|653[0n]]BOLD:ADW2886  
 Orgilus christompsoni[[109]]BIOUG44846-A07[Malaise trap PL12-1B|653[0n]]BOLD:ADW2886  
 Orgilus sandraberberioae[[110]]BIOUG28825-B03[Malaise trap PL12-9A|603[0n]]BOLD:ADB0231  
 Orgilus mikesmithi[[111]]BIOUG31641-F04[Derrumbe Malaise Trap|564[0n]]BOLD:ADF7540  
 Orgilus Malaise8348[[112]]BIOUG50477-E07[Malaise trap PL12-6B|655[0n]]BOLD:ADA8348  
 Orgilus Malaise8348[[113]]BIOUG49371-F02[Malaise trap PL12-5B|663[0n]]BOLD:ADA8348  
 Orgilus[[114]]BIOUG56471-F09[Malaise trap PL12-7D|654[0n]]BOLD:ADA8348  
 Orgilus Malaise8348[[115]]BIOUG28769-G04[Malaise trap PL12-1A|588[0n]]BOLD:ADA8348  
 Orgilus Malaise2001[[116]]BIOUG30232-C07[Malaise trap PL12-3A|589[0n]]BOLD:ADC2001  
 Orgilus mellissae spinosae[[117]]BIOUG32860-D06[Derrumbe Malaise Trap|567[0n]]BOLD:ADG8044  
 Orgilus Malaise9980[[118]]BIOUG28092-C08[ESG Malaise Trap Year 2|564[4n]]BOLD:ACZ9980  
 Orgilus Malaise67[[119]]BIOUG18764-E09[BSE Malaise Trap|588[0n]]BOLD:ACS0067  
 Orgilus richardprimacki[[120]]BIOUG30111-A11[Malaise trap PL12-3A|591[0n]]BOLD:ADB9574  
 Orgilus amyrossmanae[[121]]DHJPAR0064113[Rectiostoma eowilsoni|658[0n]]BOLD:ADY7227  
 Orgilus amyrossmanae[[122]]DHJPAR0041408[Rectiostoma eowilsoni|407[0n]]BOLD:ADY7227  
 Orgilus jeanmilleriae[[123]]BIOUG49224-B03[Malaise trap PL12-5B|654[0n]]BOLD:ADA6087  
 Orgilus jeanmilleriae[[124]]BIOUG44842-C01[Malaise trap PL12-1B|653[0n]]BOLD:ADA6087  
 Orgilus jeanmilleriae[[125]]BIOUG54264-A12[Malaise trap PL12-5C|653[0n]]BOLD:ADA6087  
 Orgilus jeanmilleriae[[126]]BIOUG44842-H07[Malaise trap PL12-1B|653[0n]]BOLD:ADA6087  
 Orgilus jeanmilleriae[[127]]BIOUG50306-B05[Malaise trap PL12-3B|654[0n]]BOLD:ADA6087  
 Orgilus jeanmilleriae[[128]]BIOUG44866-F09[Malaise trap PL12-1B|655[0n]]BOLD:ADA6087  
 Orgilus jeanmilleriae[[129]]BIOUG52668-D12[Malaise trap PL12-3C|651[0n]]BOLD:ADA6087  
 Orgilus jeanmilleriae[[130]]BIOUG53367-G10[Malaise trap PL12-1C|640[0n]]BOLD:ADA6087  
 Orgilus jeanmilleriae[[131]]BIOUG54833-F04[Malaise trap PL12-5C|658[0n]]BOLD:ADA6087  
 Orgilus jeanmilleriae[[132]]BIOUG53354-C07[Malaise trap PL12-1C|641[0n]]BOLD:ADA6087  
 Orgilus jeanmilleriae[[133]]BIOUG54359-H07[Malaise trap PL12-8C|640[0n]]BOLD:ADA6087  
 Orgilus jeanmilleriae[[134]]BIOUG29685-A09[Malaise trap PL12-3A|591[0n]]BOLD:ADA6087  
 Orgilus jeanmilleriae[[135]]BIOUG28769-G06[Malaise trap PL12-1A|591[0n]]BOLD:ADA6087  
 Orgilus jeanmilleriae[[136]]BIOUG28807-F04[Malaise trap PL12-6A|579[0n]]BOLD:ADA6087  
 Orgilus jeanmilleriae[[137]]BIOUG30926-D01[Malaise trap PL12-2A|570[0n]]BOLD:ADA6087  
 Orgilus jeanmilleriae[[138]]BIOUG28777-A07[Malaise trap PL12-1A|564[0n]]BOLD:ADA6087  
 Orgilus jeanmilleriae[[139]]BIOUG29912-B11[Malaise trap PL12-3A|567[0n]]BOLD:ADA6087  
 Orgilus jeffmilleri[[140]]BIOUG19395-H01[ESG Malaise Trap|579[0n]]BOLD:ACT7418  
 Orgilus genestorneri[[141]]BIOUG33118-F04[Derrumbe Malaise Trap|544[0n]]BOLD:ADH3907  
 Orgilus johnpipolyi[[142]]DHJPAR0048801[Anadasmus Janzen25|658[0n]]BOLD:ABU7457  
 Orgilus johnpipolyi[[143]]DHJPAR0053187[Stenoma Janzen414|658[0n]]BOLD:ABU7457  
 Orgilus johnpipolyi[[144]]DHJPAR0049901[Stenoma Janzen414|658[0n]]BOLD:ABU7457  
 Orgilus johnpipolyi[[145]]DHJPAR0048773[Anadasmus Janzen25|658[0n]]BOLD:ABU7457  
 Orgilus johnpipolyi[[146]]DHJPAR0049880[Stenoma Janzen414|658[0n]]BOLD:ABU7457  
 Orgilus johnpipolyi[[147]]DHJPAR0053188[Stenoma Janzen414|658[0n]]BOLD:ABU7457  
 Orgilus johnpipolyi[[148]]DHJPAR0045730[Stenoma Janzen414|658[0n]]BOLD:ABU7457

Orgilus johnpipolyi[147][DHJPAR0053188]Stenoma Janzen414[658[0n]]BOLD:ABU7457  
 Orgilus johnpipolyi[148][DHJPAR0045730]Stenoma Janzen414[658[0n]]BOLD:ABU7457  
 Orgilus johnpipolyi[149][DHJPAR0049367]Stenoma Janzen414[658[0n]]BOLD:ABU7457  
 Orgilus johnpipolyi[150][DHJPAR0052898]Stenoma Janzen414[658[0n]]BOLD:ABU7457  
 Orgilus johnpipolyi[151][DHJPAR0048256]Stenoma Janzen414[658[0n]]BOLD:ABU7457  
 Orgilus johnpipolyi[152][DHJPAR0049848]Stenoma Janzen414[658[0n]]BOLD:ABU7457  
 Orgilus johnpipolyi[153][DHJPAR0048772]Anadasmus Janzen25[658[0n]]BOLD:ABU7457  
 Orgilus johnpipolyi[154][DHJPAR0050144]Stenoma Janzen414[658[0n]]BOLD:ABU7457  
 Orgilus johnpipolyi[155][DHJPAR0053192]Stenoma Janzen414[658[0n]]BOLD:ABU7457  
 Orgilus johnpipolyi[156][DHJPAR0049881]Stenoma Janzen414[658[0n]]BOLD:ABU7457  
 Stantonia erikabjorstromae[157][DHJPAR0049677]Omiodes Janzen05[658[0n]]BOLD:ABX0808  
 Stantonia erikabjorstromae[158][DHJPAR0046876]Omiodes Janzen05[658[0n]]BOLD:ABX0808  
 Stantonia erikabjorstromae[159][DHJPAR0048713]Omiodes Janzen05[658[0n]]BOLD:ABX0808  
 Stantonia erikabjorstromae[160][DHJPAR0046874]Omiodes Janzen05[614[0n]]BOLD:ABX0808  
 Stantonia erikabjorstromae[161][DHJPAR0046880]Omiodes Janzen05[623[0n]]BOLD:ABX0808  
 Stantonia erikabjorstromae[162][DHJPAR0046879]Omiodes Janzen05[616[0n]]BOLD:ABX0808  
 Orgilus robinkazmierae[163][DHJPAR0049288]Inga Janzen61[658[0n]]BOLD:ACB2340  
 Orgilus robinkazmierae[164][DHJPAR0049427]Inga Janzen61[456[0n]]BOLD:ACB2340  
 Stantonia luismirandai[165][DHJPAR0029190]Oryctometopia fossulata[614[0n]]BOLD:AAH9964  
 Stantonia luismirandai[166][BIOUG29625-H09]Malaise trap PL12-3A[576[1n]]BOLD:AAH9964  
 Stantonia luismirandai[167][DHJPAR0029191]Spoladea recurvalis[614[0n]]BOLD:AAH9964  
 Stantonia billalleni[168][BIOUG52729-A05]Malaise trap PL12-9C[657[0n]]BOLD:AAM1059  
 Stantonia billalleni[169][BIOUG52668-B09]Malaise trap PL12-3C[652[0n]]BOLD:AAM1059  
 Stantonia billalleni[170][BIOUG52724-H11]Malaise trap PL12-9C[651[0n]]BOLD:AAM1059  
 Stantonia billalleni[171][DHJPAR0038188]Hyalorista exuvialis[632[0n]]BOLD:AAM1059  
 Stantonia billalleni[172][DHJPAR0051309]Hyalorista exuvialis[658[0n]]BOLD:AAM1059  
 Stantonia billalleni[173][BIOUG56490-E08]Malaise trap PL12-9D[657[0n]]BOLD:AAM1059  
 Stantonia billalleni[174][BIOUG52997-E04]Malaise trap PL12-3C[655[0n]]BOLD:AAM1059  
 Stantonia billalleni[175][BIOUG55345-G12]Malaise trap PL12-4D[654[0n]]BOLD:AAM1059  
 Stantonia billalleni[176][DHJPAR0051311]Hyalorista exuvialis[658[0n]]BOLD:AAM1059  
 Stantonia ruthifferae[177][DHJPAR0037144]Microthyris prolongalis[638[0n]]BOLD:AAB3996  
 Stantonia ruthifferae[178][DHJPAR0049372]Stenoma luctifica[618[0n]]BOLD:AAB3996  
 Stantonia donwilsoni[179][DHJPAR0029187]Omiodes humeralis[611[0n]]BOLD:AAG3930  
 Stantonia donwilsoni[180][DHJPAR0052875]Portentomorpha xanthialis[658[0n]]BOLD:AAG3930  
 Stantonia donwilsoni[181][DHJPAR0052706]Portentomorpha xanthialis[658[0n]]BOLD:AAG3930  
 Stantonia donwilsoni[182][DHJPAR0063896]Hahncappia BioLep471[621[0n]]BOLD:AAG3930  
 Stantonia donwilsoni[183][DHJPAR0063891]Phostria latiapicalis[549[0n]]BOLD:AAG3930  
 Stantonia donwilsoni[184][DHJPAR0029429]Psara obscuralis[632[0n]]BOLD:AAG3930  
 Stantonia donwilsoni[185][DHJPAR0041487]Eulepte Janzen06[658[0n]]BOLD:AAG3930  
 Stantonia donwilsoni[186][DHJPAR0052872]Portentomorpha xanthialis[658[0n]]BOLD:AAG3930  
 Stantonia miriamzunae[187][DHJPAR0048704]Ategumia lotanalis[658[0n]]BOLD:ACB1896  
 Stantonia Janzen3983[188][DHJPAR0065133]Casandria Poole01[614[0n]]BOLD:AEC3983  
 Stantonia Janzen5021[189][DHJPAR0029435]immidJanzen01 Janzen16[660[0n]]BOLD:AAJ5021  
 Stantonia garywolffi[190][DHJPAR0029189]immidJanzen01 Janzen02[406[0n]]BOLD:AAL9316  
 Stantonia garywolffi[191][DHJPAR0029188]immidJanzen01 Janzen02[623[0n]]BOLD:AAL9316  
 Stantonia brookejarvisae[192][DHJPAR0053534]Pilocrocis purpurascens[661[0n]]BOLD:AAK5505  
 Stantonia brookejarvisae[193][DHJPAR0036321]Pilocrocis purpurascens[614[0n]]BOLD:AAK5505  
 Stantonia brookejarvisae[194][DHJPAR0050920]Pilocrocis purpurascens[618[0n]]BOLD:AAK5505  
 Stantonia brookejarvisae[195][DHJPAR0052099]Pilocrocis purpurascens[648[0n]]BOLD:AAK5505  
 Stantonia brookejarvisae[196][DHJPAR0040550]Pilocrocis purpurascens[646[0n]]BOLD:AAK5505  
 Stantonia brookejarvisae[197][DHJPAR0057266]Phostria latiapicalis[661[0n]]BOLD:AAK5505  
 Stantonia brookejarvisae[198][DHJPAR0053538]Pilocrocis purpurascens[664[0n]]BOLD:AAK5505  
 Stantonia brookejarvisae[199][DHJPAR0065121]Phostria latiapicalis[630[0n]]BOLD:AAK5505  
 Stantonia brookejarvisae[200][DHJPAR0050911]Desmia benealis[643[0n]]BOLD:AAK5505  
 Stantonia brookejarvisae[201][DHJPAR0050354]Pilocrocis purpurascens[658[0n]]BOLD:AAK5505  
 Stantonia quentinwheeleri[202][DHJPAR0045054]Syllepis marialis[658[0n]]BOLD:AAD5731  
 Stantonia quentinwheeleri[203][DHJPAR0029430]Syllepis hortalis[657[0n]]BOLD:AAD5731  
 Stantonia quentinwheeleri[204][DHJPAR0029431]Syllepis hortalis[571[0n]]BOLD:AAD5731  
 Stantonia quentinwheeleri[205][DHJPAR0036719]Syllepis hortalis[644[0n]]BOLD:AAD5731  
 Stantonia quentinwheeleri[206][DHJPAR0029432]Syllepis hortalis[657[0n]]BOLD:AAD5731  
 Stantonia quentinwheeleri[207][DHJPAR0029434]Syllepis hortalis[657[0n]]BOLD:AAD5731  
 Stantonia quentinwheeleri[208][DHJPAR0029433]Syllepis hortalis[657[0n]]BOLD:AAD5731  
 Stantonia henrikekmani[209][DHJPAR0035221]Eulepte Janzen03[658[0n]]BOLD:AAI2111  
 Stantonia henrikekmani[210][DHJPAR0035220]Eulepte Janzen03[658[0n]]BOLD:AAI2111  
 Stantonia henrikekmani[211][DHJPAR0050358]Pilocrocis Solis20[658[0n]]BOLD:AAI2111  
 Stantonia henrikekmani[212][DHJPAR0052825]Desmia benealis[658[0n]]BOLD:AAI2111  
 Stantonia henrikekmani[213][DHJPAR0054462]Desmia ploralis[658[0n]]BOLD:AAI2111  
 Stantonia henrikekmani[214][DHJPAR0054466]Eulepte Janzen03[658[0n]]BOLD:AAI2111  
 Stantonia henrikekmani[215][DHJPAR0056229]Ceratocilia sixolalis[626[0n]]BOLD:AAI2111  
 Stantonia henrikekmani[216][DHJPAR0054465]Eulepte Janzen03[658[0n]]BOLD:AAI2111  
 Stantonia henrikekmani[217][DHJPAR0056233]Ceratocilia sixolalis[670[0n]]BOLD:AAI2111  
 Stantonia henrikekmani[218][DHJPAR0056230]Ceratocilia sixolalis[670[0n]]BOLD:AAI2111  
 Stantonia henrikekmani[219][DHJPAR0056234]Ceratocilia sixolalis[670[0n]]BOLD:AAI2111  
 Stantonia henrikekmani[220][DHJPAR0056231]Ceratocilia sixolalis[670[0n]]BOLD:AAI2111  
 Stantonia henrikekmani[221][DHJPAR0056232]Ceratocilia sixolalis[670[0n]]BOLD:AAI2111
