# Supplementary material for: Minimalist revision and description of 403 new species in 11 subfamilies of Costa Rican braconid parasitoid wasps, including host records for 219 species
Source: PubMed Central journal article supplement (PMC8390796; doi:10.3897/zookeys.1013.55600), 2021-02-02

## 9. Rhysipolinae BOLD TaxonID Tree

Title : Tree Result - Search: Sample IDs (17 records returned) (17 records selected)

Date : 17-Nov-2020

Data Type : Nucleotide

Distance Model : Kimura 2 Parameter

Marker : COI-5P

Colourization : [blue]=Stop Codons [red]=Contamination or misidentification

  

Label : Sample ID

Label : Taxon

Label : Extra Info

Label : Sequence Length

Label : Barcode Cluster (BIN)

  

Filter : exclude records with stop codons

  

Sequence Count : 17

Species count : 5

Genus count : 2

Family count : 1

Unidentified : 1

  

BIN Count : 5

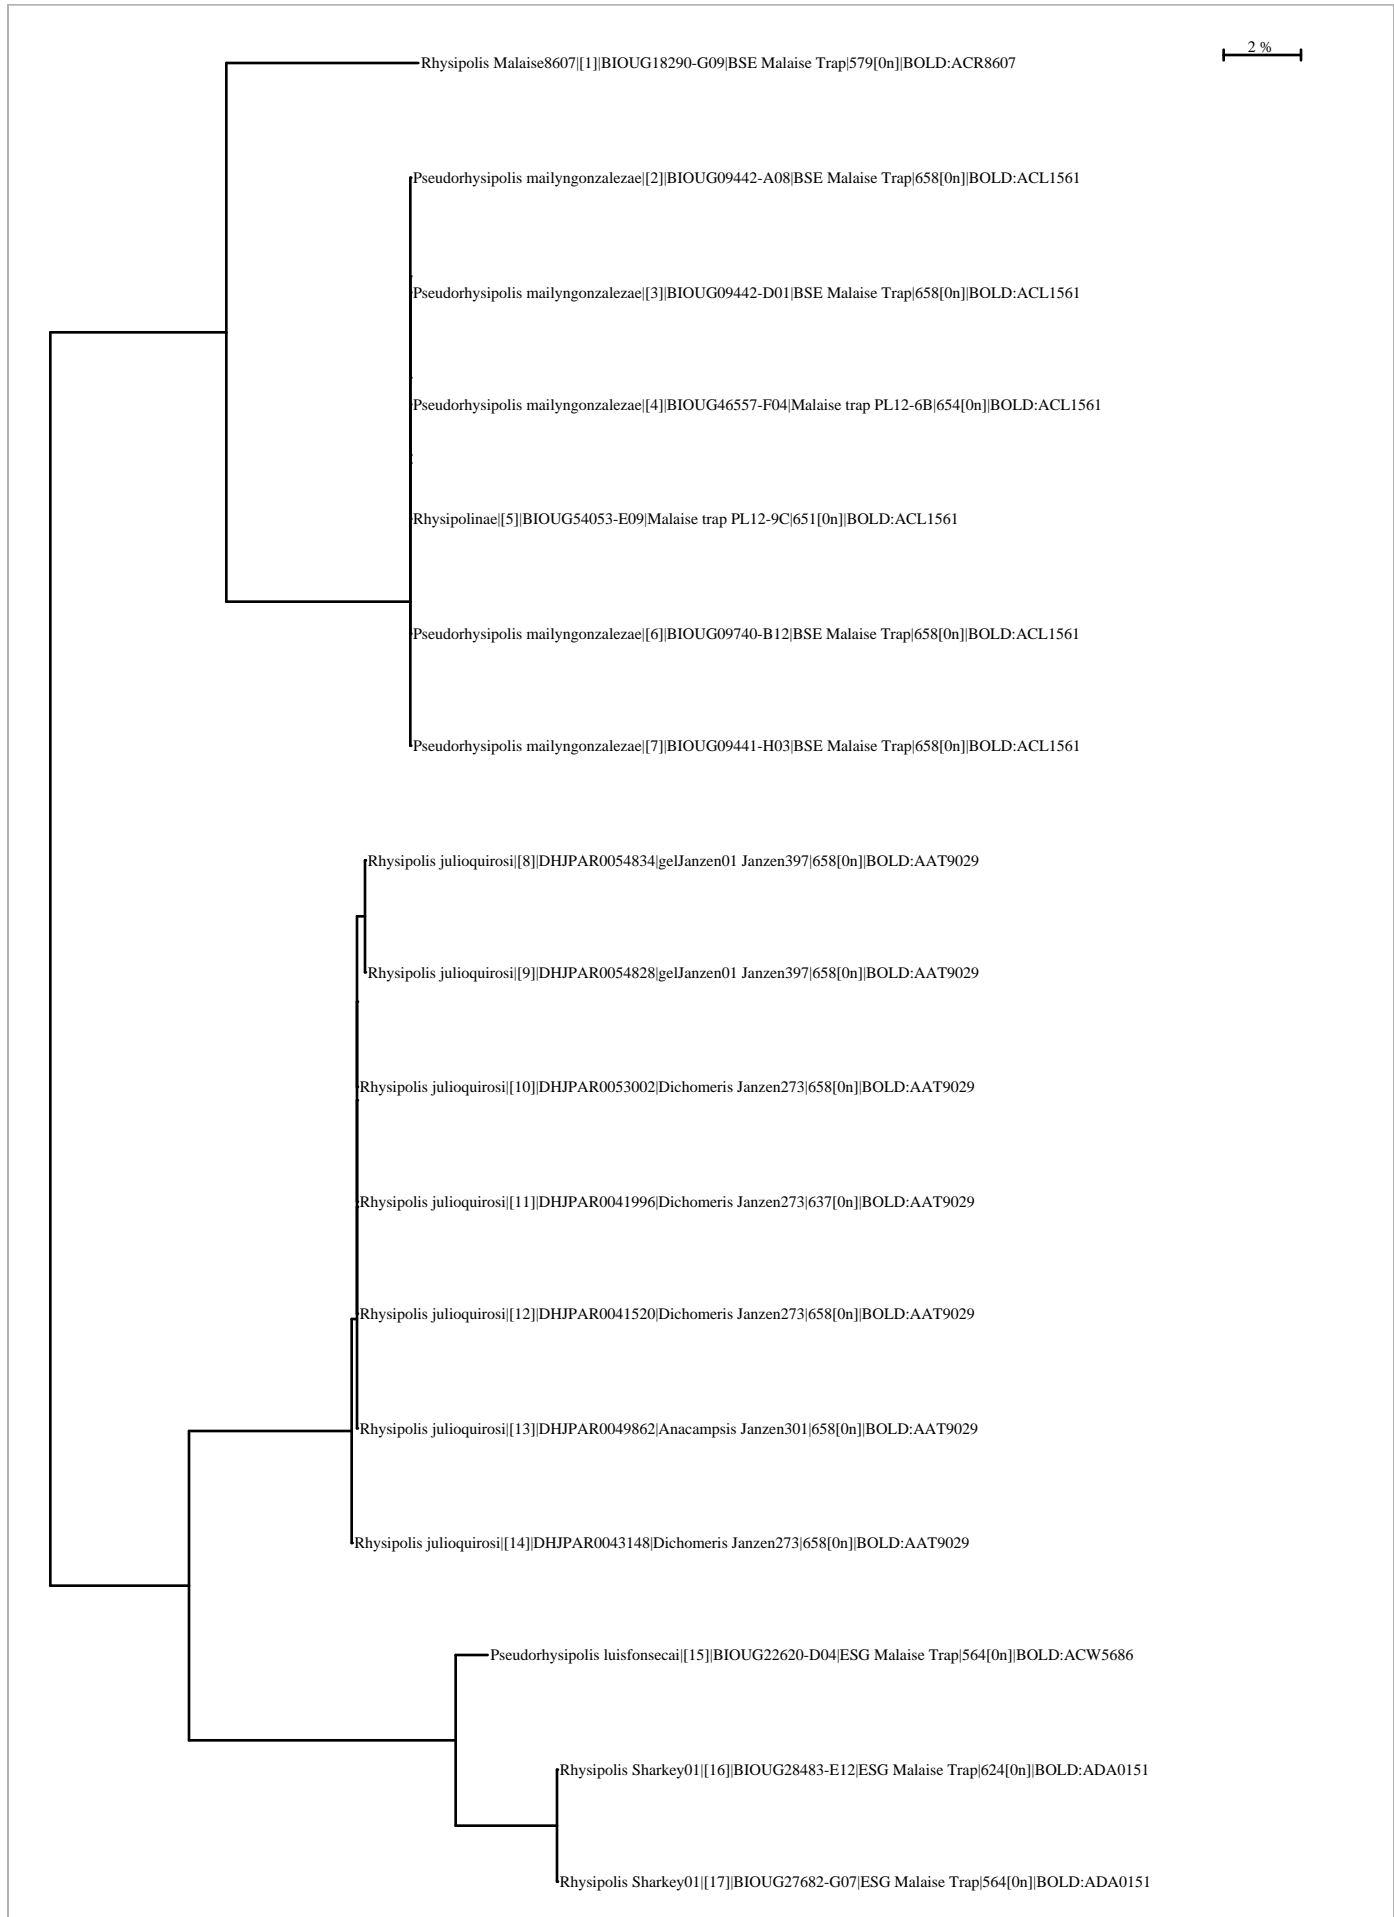

Supplement: zookeys-1013-001-s009.pdf [file zookeys-1013-001-s009.pdf]
