# Supplementary material for: Minimalist revision and description of 403 new species in 11 subfamilies of Costa Rican braconid parasitoid wasps, including host records for 219 species
Source: PubMed Central journal article supplement (PMC8390796; doi:10.3897/zookeys.1013.55600), 2021-02-02
Supplement: zookeys-1013-001-s010.pdf [file zookeys-1013-001-s010.pdf]

## 10. Rogadinae BOLD TaxonID Tree

Title : Tree Result - Search: Sample IDs (699 records returned) (699 records selected)

Date : 17-Nov-2020

Data Type : Nucleotide

Distance Model : Kimura 2 Parameter

Marker : COI-5P

Colourization : [blue]=Stop Codons [red]=Contamination or misidentification

  

Label : Sample ID

Label : Taxon

Label : Extra Info

Label : Sequence Length

Label : Barcode Cluster (BIN)

  

Filter : exclude records with stop codons

  

Sequence Count : 680

Species count : 134

Genus count : 10

Family count : 1

Unidentified : 36

  

BIN Count : 129

5 %

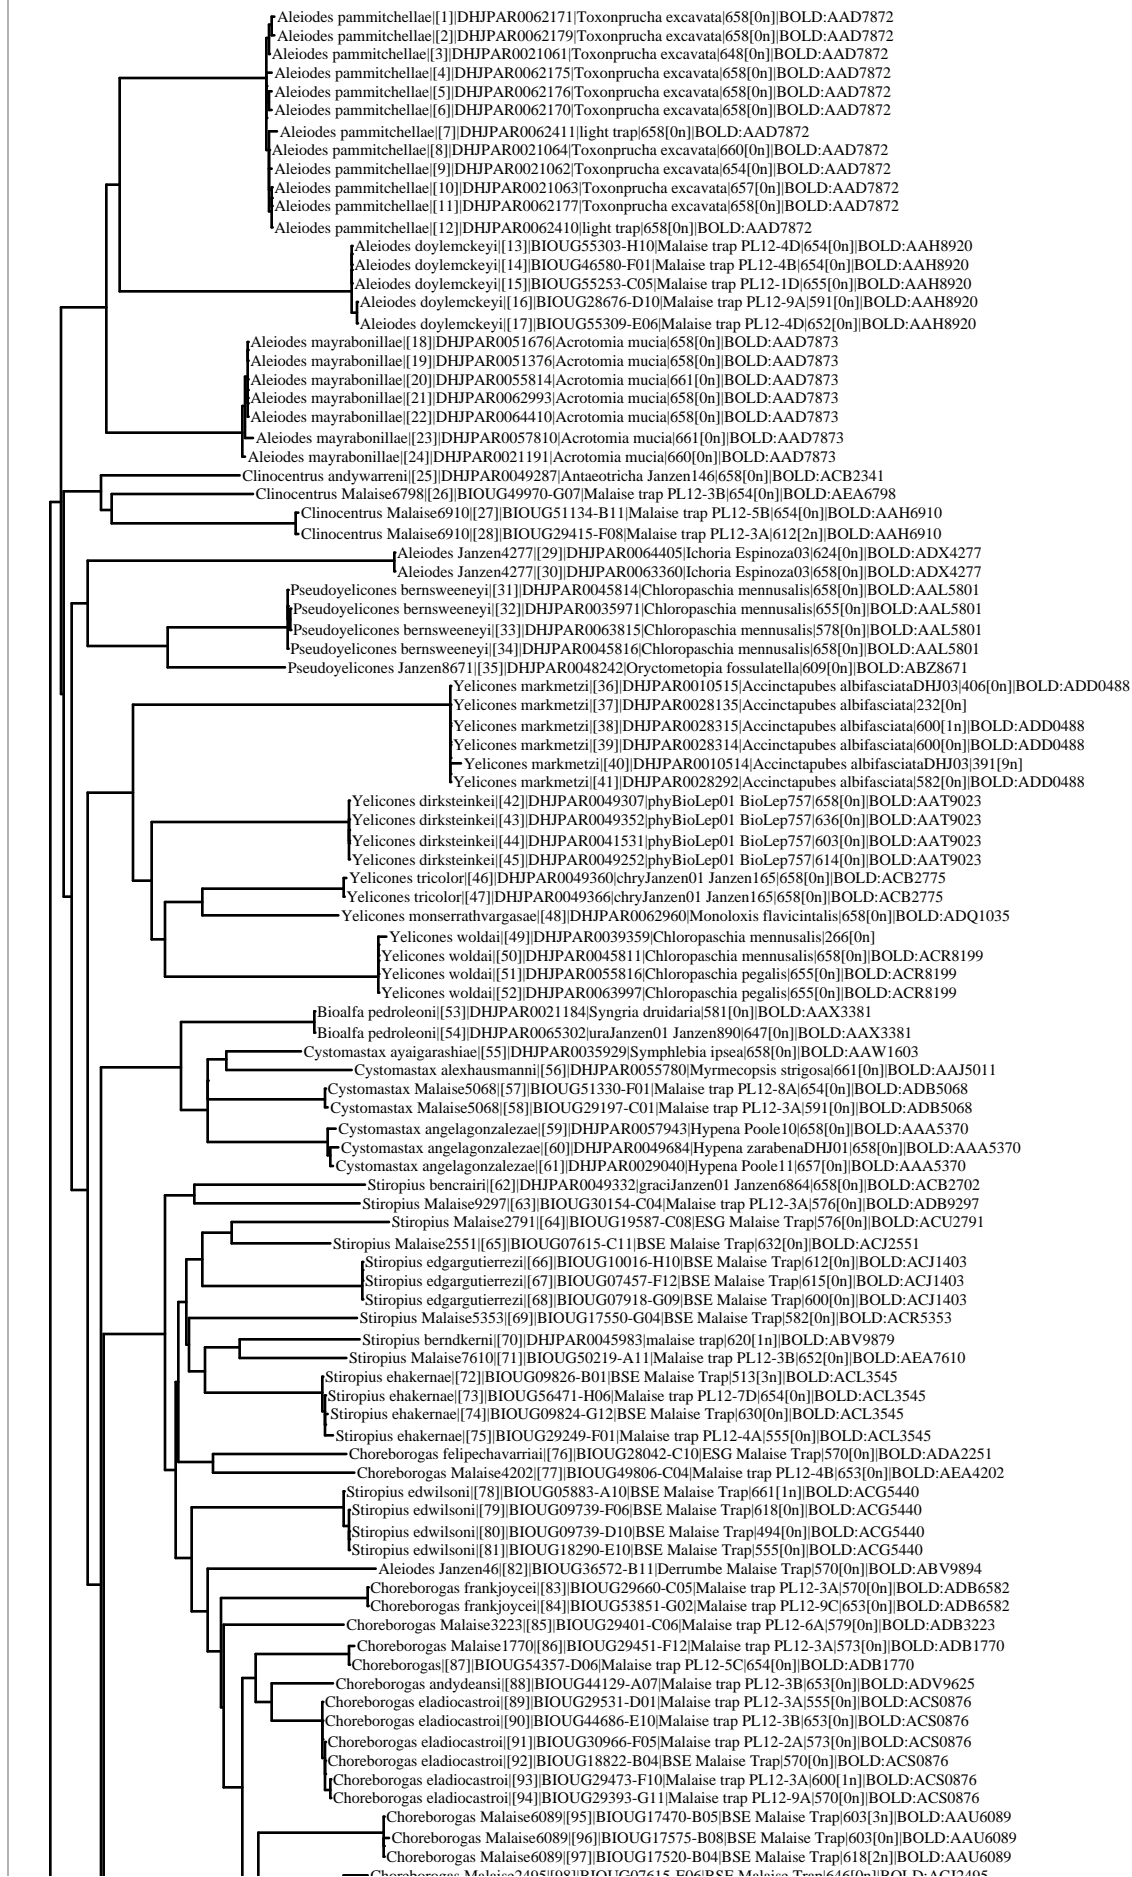

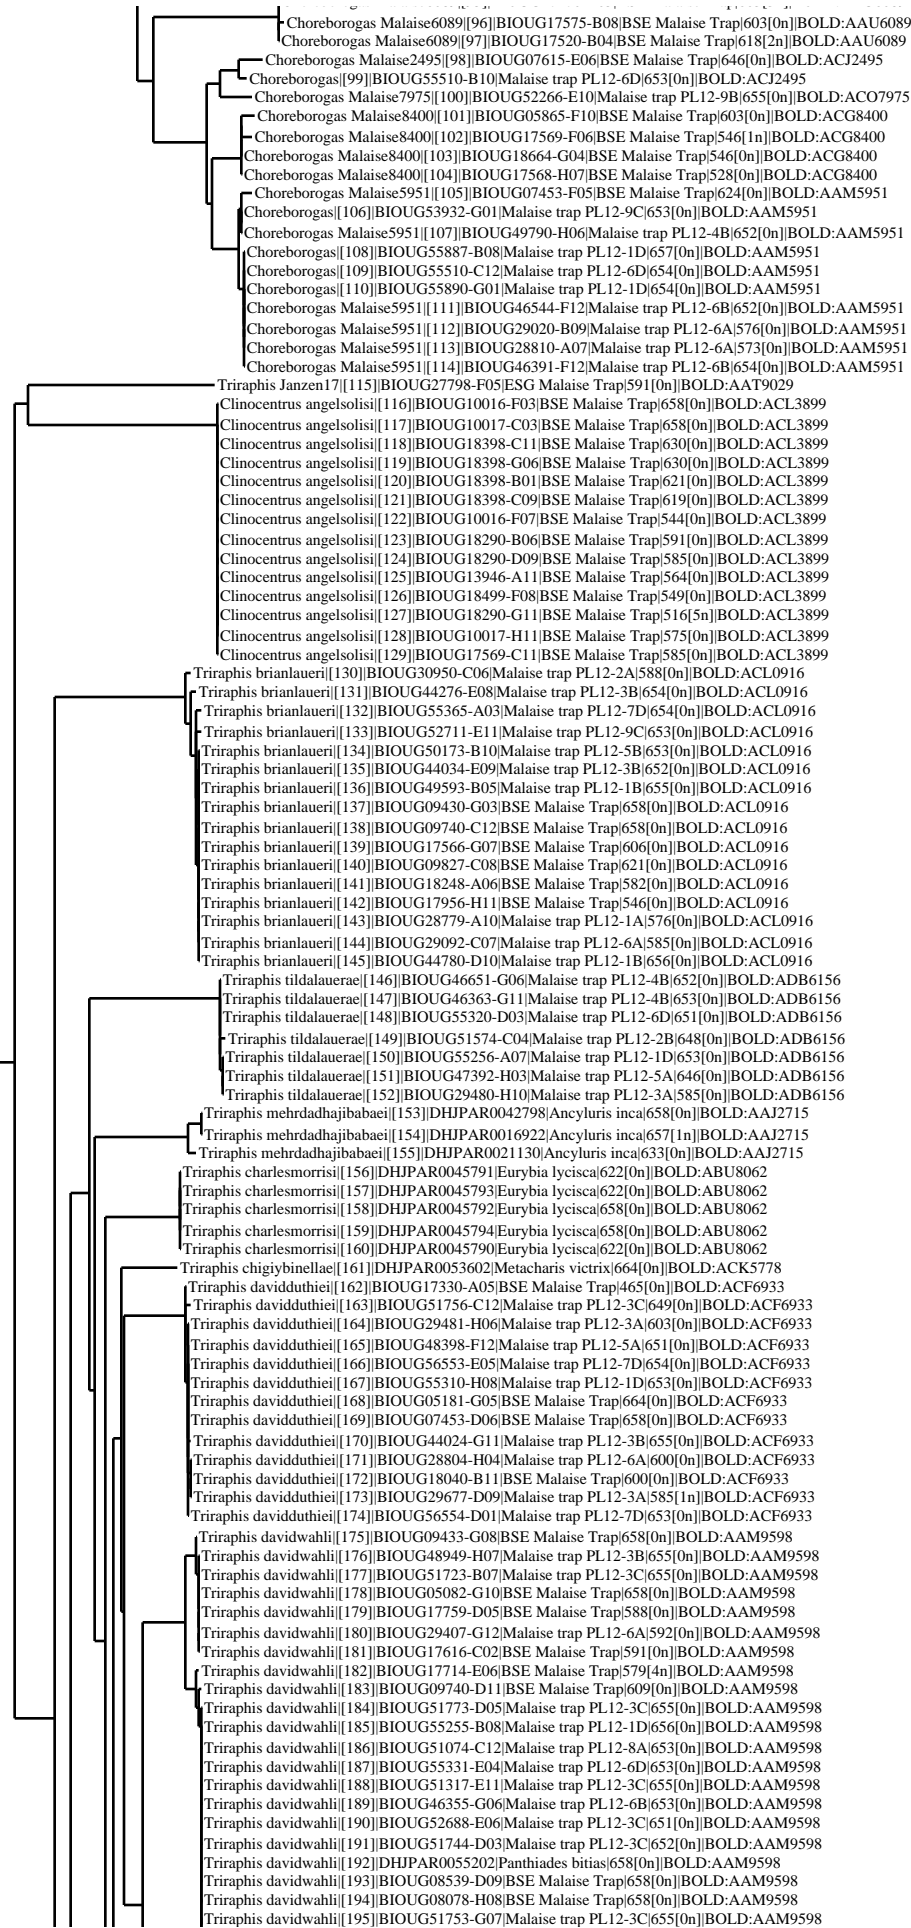

Triraphis davidwahlii[193]BIOUG08539-D09|BSE Malaise Trap|658[0n]|BOLD:AAM9598  
 Triraphis davidwahlii[194]BIOUG08078-H08|BSE Malaise Trap|658[0n]|BOLD:AAM9598  
 Triraphis davidwahlii[195]BIOUG51753-G07|Malaise trap PL12-3C|655[0n]|BOLD:AAM9598  
 Triraphis davidwahlii[196]BIOUG09826-F07|BSE Malaise Trap|577[0n]|BOLD:AAM9598  
 Triraphis davidwahlii[197]BIOUG29438-C09|Malaise trap PL12-6A|591[0n]|BOLD:AAM9598  
 Triraphis davidwahlii[198]BIOUG18433-B04|BSE Malaise Trap|534[0n]|BOLD:AAM9598  
 Triraphis davidwahlii[199]BIOUG29495-B10|Malaise trap PL12-6A|588[0n]|BOLD:AAM9598  
 Triraphis davidwahlii[200]BIOUG29019-B09|Malaise trap PL12-6A|570[0n]|BOLD:AAM9598  
 Triraphis brianbrownii[201]DHJPAR0054548|Panthiades bitias|658[0n]|BOLD:AAE0329  
 Triraphis brianbrownii[202]DHJPAR0028327|Panthiades bitias|654[0n]|BOLD:AAE0329  
 Triraphis brianbrownii[203]BIOUG29630-A05|Malaise trap PL12-3A|603[0n]|BOLD:AAE0329  
 Triraphis brianbrownii[204]BIOUG09433-E05|BSE Malaise Trap|604[0n]|BOLD:AAE0329  
 Triraphis brianbrownii[205]BIOUG09433-H01|BSE Malaise Trap|604[0n]|BOLD:AAE0329  
 Triraphis brianbrownii[206]BIOUG09827-B12|BSE Malaise Trap|585[0n]|BOLD:AAE0329  
 Triraphis brianbrownii[207]BIOUG09733-H06|BSE Malaise Trap|603[0n]|BOLD:AAE0329  
 Triraphis brianbrownii[208]DHJPAR0061496|Evenus regalis|658[0n]|BOLD:AAE0329  
 Triraphis conniebarlowae[209]DHJPAR0061498|Caria rhacotis|658[0n]|BOLD:ADJ3083  
 Triraphis conniebarlowae[210]DHJPAR0061495|Caria rhacotis|658[0n]|BOLD:ADJ3083  
 Triraphis craigsimonsi[211]DHJPAR0062174|Napaea eucharila|658[0n]|BOLD:ADM7982  
 Triraphis martindohrni[212]DHJPAR0042388|Meseosemia grandis|633[0n]|BOLD:ABZ7672  
 Triraphis bobrobbinsi[213]DHJPAR0021195|Thisbe irenea|660[0n]|BOLD:AAD2033  
 Triraphis bobrobbinsi[214]DHJPAR0040357|Thisbe irenea|658[0n]|BOLD:AAD2033  
 Triraphis bobrobbinsi[215]DHJPAR0056005|Thisbe irenea|670[0n]|BOLD:AAD2033  
 Triraphis bobrobbinsi[216]DHJPAR0052094|Thisbe irenea|658[0n]|BOLD:AAD2033  
 Triraphis bobrobbinsi[217]DHJPAR0021193|Thisbe irenea|657[0n]|BOLD:AAD2033  
 Triraphis bobrobbinsi[218]DHJPAR0048705|Thisbe irenea|658[0n]|BOLD:AAD2033  
 Triraphis bobrobbinsi[219]DHJPAR0021182|Thisbe irenea|657[0n]|BOLD:AAD2033  
 Triraphis bobrobbinsi[220]DHJPAR0021183|Thisbe irenea|657[0n]|BOLD:AAD2033  
 Triraphis bobrobbinsi[221]DHJPAR0021192|Thisbe irenea|657[0n]|BOLD:AAD2033  
 Triraphis bobrobbinsi[222]DHJPAR0040353|Thisbe irenea|658[0n]|BOLD:AAD2033  
 Triraphis bobrobbinsi[223]DHJPAR0021187|Thisbe irenea|657[0n]|BOLD:AAD2033  
 Triraphis bobrobbinsi[224]DHJPAR0021190|Thisbe irenea|657[0n]|BOLD:AAD2033  
 Triraphis bobrobbinsi[225]DHJPAR0040356|Thisbe irenea|658[0n]|BOLD:AAD2033  
 Triraphis bobrobbinsi[226]DHJPAR0041144|Thisbe irenea|619[0n]|BOLD:AAD2033  
 Triraphis bobrobbinsi[227]DHJPAR0040563|Thisbe irenea|498[0n]  
 Triraphis bobrobbinsi[228]DHJPAR0040352|Thisbe irenea|627[0n]|BOLD:AAD2033  
 Triraphis bobrobbinsi[229]DHJPAR0040355|Thisbe irenea|614[0n]|BOLD:AAD2033  
 Triraphis bobrobbinsi[230]DHJPAR0065335|Thisbe irenea|621[0n]|BOLD:AAD2033  
 Triraphis bobrobbinsi[231]DHJPAR0021185|Thisbe irenea|657[0n]|BOLD:AAD2033  
 Triraphis bobrobbinsi[232]DHJPAR0040354|Thisbe irenea|658[0n]|BOLD:AAD2033  
 Triraphis Janzen119[233]DHJPAR0028036|Meseosemia carissima|660[0n]|BOLD:AAC3253  
 Triraphis Janzen105[234]DHJPAR0021129|Meseosemia grandis|657[0n]|BOLD:AAW1568  
 Triraphis carlosherrerae[235]DHJPAR0050030|Emesis mandana|658[0n]|BOLD:AAW1546  
 Triraphis carlosherrerae[236]DHJPAR0030715|Emesis mandana|606[0n]|BOLD:AAW1546  
 Triraphis olliefintii[237]DHJPAR0041604|ereJanzen 10-SRNP-32223|658[0n]|BOLD:ABU5849  
 Triraphis camilocamargoi[238]DHJPAR0017285|Anteros formosus|660[0n]|BOLD:AAJ3968  
 Triraphis camilocamargoi[239]DHJPAR0049947|Anteros formosus|658[0n]|BOLD:AAJ3968  
 Triraphis camilocamargoi[240]DHJPAR0051362|Anteros formosus|658[0n]|BOLD:AAJ3968  
 Triraphis camilocamargoi[241]DHJPAR0049949|Anteros formosus|658[0n]|BOLD:AAJ3968  
 Triraphis camilocamargoi[242]DHJPAR0063461|Anteros formosus|658[0n]|BOLD:AAJ3968  
 Triraphis Janzen5131[243]DHJPAR0065131|Menander menander|631[0n]|BOLD:AEC2255  
 Triraphis Janzen5373[244]DHJPAR0029045|Cyanophrys fusius|652[0n]|BOLD:AAA5373  
 Triraphis danielhubi[245]BIOUG08905-F04|BSE Malaise Trap|658[0n]|BOLD:AAM9596  
 Triraphis danielhubi[246]BIOUG52036-E06|Malaise trap PL12-8B|653[0n]|BOLD:AAM9596  
 Triraphis danielhubi[247]BIOUG55245-G05|Malaise trap PL12-5C|654[0n]|BOLD:AAM9596  
 Triraphis danielhubi[248]BIOUG49950-A01|Malaise trap PL12-3B|653[0n]|BOLD:AAM9596  
 Triraphis danielhubi[249]BIOUG49810-D10|Malaise trap PL12-3B|653[0n]|BOLD:AAM9596  
 Triraphis danielhubi[250]BIOUG49945-D03|Malaise trap PL12-3B|654[0n]|BOLD:AAM9596  
 Triraphis danielhubi[251]BIOUG53747-E10|Malaise trap PL12-1D|655[0n]|BOLD:AAM9596  
 Triraphis danielhubi[252]BIOUG55309-E02|Malaise trap PL12-4D|653[0n]|BOLD:AAM9596  
 Triraphis danielhubi[253]BIOUG50934-G12|Malaise trap PL12-5B|654[0n]|BOLD:AAM9596  
 Triraphis danielhubi[254]BIOUG08911-B10|BSE Malaise Trap|658[0n]|BOLD:AAM9596  
 Triraphis danielhubi[255]BIOUG08911-B11|BSE Malaise Trap|658[0n]|BOLD:AAM9596  
 Triraphis danielhubi[256]BIOUG49430-C05|Malaise trap PL12-3B|646[0n]|BOLD:AAM9596  
 Triraphis danielhubi[257]BIOUG17468-D07|BSE Malaise Trap|591[0n]|BOLD:AAM9596  
 Triraphis danielhubi[258]BIOUG17494-D05|BSE Malaise Trap|603[0n]|BOLD:AAM9596  
 Triraphis bradzlottnicki[259]DHJPAR0035545|Podalia orsilocha|628[0n]|BOLD:AAD7334  
 Triraphis bradzlottnicki[260]DHJPAR0035251|Podalia orsilocha|617[0n]|BOLD:AAD7334  
 Triraphis bradzlottnicki[261]DHJPAR0035546|Podalia orsilocha|658[0n]|BOLD:AAD7334  
 Triraphis bradzlottnicki[262]DHJPAR0045688|Venadicodia caneti|658[0n]|BOLD:AAD7334  
 Triraphis bradzlottnicki[263]DHJPAR0035289|Podalia orsilocha|658[0n]|BOLD:AAD7334  
 Triraphis bradzlottnicki[264]DHJPAR0062195|Venadicodia caneti|658[0n]|BOLD:AAD7334  
 Triraphis bradzlottnicki[265]DHJPAR0035536|Podalia orsilocha|658[0n]|BOLD:AAD7334  
 Triraphis bradzlottnicki[266]DHJPAR0035258|Podalia orsilocha|658[0n]|BOLD:AAD7334  
 Triraphis matstegnestami[267]DHJPAR0045708|Venadicodia caneti|658[0n]|BOLD:ABU7454  
 Triraphis briannestjacquesae[268]DHJPAR0045388|Trosia nigropunctigera|658[1n]|BOLD:AAF7900  
 Triraphis briannestjacquesae[269]DHJPAR0055965|Trosia nigropunctigera|670[0n]|BOLD:AAF7900  
 Triraphis briannestjacquesae[270]DHJPAR0055968|Trosia nigropunctigera|670[0n]|BOLD:AAF7900  
 Triraphis briannestjacquesae[271]DHJPAR0055967|Trosia nigropunctigera|670[0n]|BOLD:AAF7900  
 Triraphis briannestjacquesae[272]DHJPAR0055966|Trosia nigropunctigera|670[0n]|BOLD:AAF7900  
 Triraphis ferrisjabri[273]BIOUG27980-B02|ESG Malaise Trap Year 2|585[0n]|BOLD:ADA2501  
 Triraphis federicomatarrtai[274]BIOUG19932-A06|ESG Malaise Trap|591[0n]|BOLD:ACX5348  
 Triraphis carolinepalmerae[275]BIOUG27999-A10|ESG Malaise Trap|594[0n]|BOLD:ABA9319  
 Triraphis carolinepalmerae[276]DHJPAR0045383|Isochaetes dwagsi|658[2n]|BOLD:ABA9319  
 Triraphis Janzen3599[277]DHJPAR0048078|zygJanzen01 Janzen21|658[0n]|BOLD:ABY3599  
 Triraphis Janzen04[278]DHJPAR0017287|Megalopyge Janzen06|288[1n]  
 Triraphis mariobozai[279]DHJPAR0021186|Megalopyge Janzen06|660[0n]|BOLD:AAB1652  
 Triraphis mariobozai[280]DHJPAR0028756|Megalopyge Janzen06|657[0n]|BOLD:AAB1652  
 Triraphis mariobozai[281]DHJPAR0021177|Megalopyge Janzen06|657[0n]|BOLD:AAB1652  
 Triraphis mariobozai[282]DHJPAR0021189|Megalopyge Janzen06|657[0n]|BOLD:AAB1652  
 Triraphis mariobozai[283]DHJPAR0021176|Megalopyge Janzen06|657[0n]|BOLD:AAB1652  
 Triraphis mariobozai[284]DHJPAR0021178|Megalopyge Janzen06|657[0n]|BOLD:AAB1652  
 Triraphis mariobozai[285]DHJPAR0021172|Megalopyge Janzen06|657[0n]|BOLD:AAB1652  
 Triraphis mariobozai[286]DHJPAR0021173|Megalopyge Janzen06|657[0n]|BOLD:AAB1652  
 Triraphis mariobozai[287]DHJPAR0021174|Megalopyge Janzen06|657[0n]|BOLD:AAB1652  
 Triraphis mariobozai[288]DHJPAR0021179|Megalopyge Janzen06|657[0n]|BOLD:AAB1652  
 Triraphis mariobozai[289]DHJPAR0021175|Megalopyge Janzen06|657[0n]|BOLD:AAB1652  
 Triraphis billfreelandi[290]DHJPAR0029047|Vipsophobetron davisii|657[0n]|BOLD:AAA5375  
 Triraphis billfreelandi[291]DHJPAR0050910|Parasa sandrae|645[0n]|BOLD:AAA5375  
 Triraphis billfreelandi[292]DHJPAR0040078|Parasa sandrae|658[0n]|BOLD:AAA5375

Triraphis bilimclarneyi[290]DHJP0036311|zygjanzen01 Janzen23|658[0n]BOLD:AAA7065  
 Triraphis bilimclarneyi[291]DHJP0036311|zygjanzen01 Janzen23|658[0n]BOLD:AAA7065  
 Triraphis bilimclarneyi[292]DHJP0036311|zygjanzen01 Janzen23|658[0n]BOLD:AAA7065  
 Triraphis bilimclarneyi[293]DHJP0036311|zygjanzen01 Janzen23|658[0n]BOLD:AAA7065  
 Triraphis bilimclarneyi[294]DHJP0036311|zygjanzen01 Janzen23|658[0n]BOLD:AAA7065  
 Triraphis bilimclarneyi[295]DHJP0036311|zygjanzen01 Janzen23|658[0n]BOLD:AAA7065  
 Triraphis bilimclarneyi[296]DHJP0030595|zygjanzen01 Janzen23|630[1n]BOLD:AAA7065  
 Triraphis bilimclarneyi[297]DHJP0030597|zygjanzen01 Janzen23|658[0n]BOLD:AAA7065  
 Triraphis bilimclarneyi[298]DHJP0030594|zygjanzen01 Janzen23|658[0n]BOLD:AAA7065  
 Triraphis bilimclarneyi[299]DHJP0030592|zygjanzen01 Janzen23|658[1n]BOLD:AAA7065  
 Triraphis bilimclarneyi[300]DHJP0030596|zygjanzen01 Janzen23|658[0n]BOLD:AAA7065  
 Triraphis bilimclarneyi[301]DHJP0037873|zygjanzen01 Janzen23|658[0n]BOLD:AAA7065  
 Triraphis bilimclarneyi[302]DHJP0030598|zygjanzen01 Janzen23|633[0n]BOLD:AAA7065  
 Triraphis billiripplei[303]DHJP0021201|Norape Janzen03|660[0n]BOLD:AAB1658  
 Triraphis billiripplei[304]DHJP0028330|Megalopygidae 98-SRNP-3934|576[0n]BOLD:AAB1658  
 Triraphis billiripplei[305]DHJP0036305|Norape Janzen03|658[0n]BOLD:AAB1658  
 Triraphis billiripplei[306]DHJP0028329|Megalopygidae 98-SRNP-3934|654[0n]BOLD:AAB1658  
 Triraphis billiripplei[307]BIOUG28640-H06|Malaise trap PL12-7A|591[0n]BOLD:AAB1658  
 Triraphis christerhanssonii[308]DHJP0058770|megaJanzen01 98-SRNP-3934|658[0n]BOLD:ADB1219  
 Triraphis christerhanssonii[309]DHJP0058774|megaJanzen01 98-SRNP-3934|658[0n]BOLD:ADB1219  
 Triraphis christerhanssonii[310]DHJP0058772|megaJanzen01 98-SRNP-3934|658[0n]BOLD:ADB1219  
 Triraphis christerhanssonii[311]DHJP0058773|megaJanzen01 98-SRNP-3934|658[0n]BOLD:ADB1219  
 Triraphis christerhanssonii[312]DHJP0058775|megaJanzen01 98-SRNP-3934|658[0n]BOLD:ADB1219  
 Triraphis christerhanssonii[313]DHJP0058771|megaJanzen01 98-SRNP-3934|658[0n]BOLD:ADB1219  
 Triraphis defectus[314]DHJP0029046|Vipsania rosabella|657[0n]BOLD:AAA5374  
 Triraphis defectus[315]BIOUG05386-B06|BSE Malaise Trap|658[0n]BOLD:AAA5374  
 Triraphis defectus[316]BIOUG05279-H01|BSE Malaise Trap|658[0n]BOLD:AAA5374  
 Triraphis defectus[317]DHJP0021194|Parasa wellisca|657[0n]BOLD:AAA5374  
 Triraphis christthompsonii[318]DHJP0029048|Pampa Janzen04|657[0n]BOLD:ACK7801  
 Triraphis christthompsonii[319]DHJP0048107|Pampa Janzen04|658[0n]BOLD:ACK7801  
 Triraphis christthompsonii[320]DHJP0064009|Pampa Janzen04|629[0n]BOLD:ACK7801  
 Triraphis christthompsonii[321]DHJP0029064|Pampa Janzen04|657[0n]BOLD:ACK7801  
 Triraphis christthompsonii[322]DHJP0065330|Harrisinia Janzen18|658[0n]BOLD:ACK7801  
 Triraphis christthompsonii[323]DHJP0045818|Pampa Janzen04|658[0n]BOLD:ACK7801  
 Triraphis christthompsonii[324]DHJP0059698|Pampa Janzen04|658[0n]BOLD:ACK7801  
 Triraphis christthompsonii[325]DHJP0065339|Harrisinia Janzen18|647[0n]BOLD:ACK7801  
 Triraphis christthompsonii[326]DHJP0050069|Pampa Janzen04|605[0n]BOLD:ACK7801  
 Triraphis christthompsonii[327]DHJP0029059|Pampa Janzen04|351[8n]BOLD:ACK7801  
 Triraphis bobandersoni[328]DHJP0064450|Epiperola vafarella|658[0n]BOLD:AEB4766  
 Triraphis bobandersoni[329]DHJP0063968|Epiperola vafarella|658[0n]BOLD:AEB4766  
 Triraphis bobandersoni[330]DHJP0023701|Epiperola vafarella|645[0n]BOLD:AAB8975  
 Triraphis bobandersoni[331]DHJP0023533|Epiperola vafarella|629[0n]BOLD:AAB8975  
 Triraphis bobandersoni[332]DHJP0023698|Epiperola vafarella|629[0n]BOLD:AAB8975  
 Triraphis bobandersoni[333]DHJP0023722|Epiperola vafarella|629[0n]BOLD:AAB8975  
 Triraphis bobandersoni[334]DHJP0023694|Epiperola vafarella|629[0n]BOLD:AAB8975  
 Triraphis bobandersoni[335]DHJP0023690|Epiperola vafarella|642[0n]BOLD:AAB8975  
 Triraphis bobandersoni[336]DHJP0023704|Epiperola vafarella|645[0n]BOLD:AAB8975  
 Triraphis bobandersoni[337]DHJP0023716|Epiperola vafarella|645[0n]BOLD:AAB8975  
 Triraphis bobandersoni[338]DHJP0038384|Epiperola vafarella|658[0n]BOLD:AAB8975  
 Triraphis bobandersoni[339]DHJP0023532|Epiperola vafarella|657[0n]BOLD:AAB8975  
 Triraphis bobandersoni[340]DHJP0038385|Epiperola vafarella|658[0n]BOLD:AAB8975  
 Triraphis bobandersoni[341]DHJP0051666|Epiperola vafarella|658[0n]BOLD:AAB8975  
 Triraphis bobandersoni[342]DHJP0037964|Epiperola vafarella|658[0n]BOLD:AAB8975  
 Triraphis bobandersoni[343]DHJP0023689|Epiperola vafarella|635[0n]BOLD:AAB8975  
 Triraphis bobandersoni[344]DHJP0023519|Epiperola vafarella|635[0n]BOLD:AAB8975  
 Triraphis bobandersoni[345]DHJP0030619|Epiperola vafarella|638[0n]BOLD:AAB8975  
 Triraphis bobandersoni[346]DHJP0023702|Epiperola vafarella|630[0n]BOLD:AAB8975  
 Triraphis bobandersoni[347]DHJP0037970|Epiperola vafarella|658[0n]BOLD:AAB8975  
 Triraphis bobandersoni[348]DHJP0023527|Epiperola vafarella|657[0n]BOLD:AAB8975  
 Triraphis bobandersoni[349]DHJP0037969|Epiperola vafarella|658[0n]BOLD:AAB8975  
 Triraphis bobandersoni[350]DHJP0051315|Epiperola vafarella|658[0n]BOLD:AAB8975  
 Triraphis bobandersoni[351]DHJP0037973|Epiperola vafarella|658[0n]BOLD:AAB8975  
 Triraphis bobandersoni[352]DHJP0037972|Epiperola vafarella|658[0n]BOLD:AAB8975  
 Triraphis bobandersoni[353]DHJP0038386|Epiperola vafarella|658[0n]BOLD:AAB8975  
 Triraphis bobandersoni[354]DHJP0017286|Epiperola vafarella|657[0n]BOLD:AAB8975  
 Triraphis bobandersoni[355]DHJP0023518|Epiperola vafarella|631[0n]BOLD:AAB8975  
 Rogadinae[356]BIOUG56035-E07|Malaise trap PL12-3D|652[0n]BOLD:AAH8697  
 Heterogamus donstonei[357]BIOUG51263-E01|Malaise trap PL12-8A|640[0n]BOLD:AAH8697  
 Heterogamus donstonei[358]BIOUG50161-D02|Malaise trap PL12-5A|654[0n]BOLD:AAH8697  
 Rogadinae[359]BIOUG52713-D09|Malaise trap PL12-9C|652[0n]BOLD:AAH8697  
 Rogadinae[360]BIOUG53747-A04|Malaise trap PL12-1D|655[0n]BOLD:AAH8697  
 Rogadinae[361]BIOUG55890-F12|Malaise trap PL12-1D|651[0n]BOLD:AAH8697  
 Rogadinae[362]BIOUG55545-C11|Malaise trap PL12-6D|654[0n]BOLD:AAH8697  
 Rogadinae[363]BIOUG55228-A09|Malaise trap PL12-4D|654[0n]BOLD:AAH8697  
 Rogadinae[364]BIOUG55308-B04|Malaise trap PL12-4D|654[0n]BOLD:AAH8697  
 Rogadinae[365]BIOUG53747-A03|Malaise trap PL12-1D|655[0n]BOLD:AAH8697  
 Rogadinae[366]BIOUG55886-H10|Malaise trap PL12-1D|653[0n]BOLD:AAH8697  
 Heterogamus donstonei[367]BIOUG50155-F08|Malaise trap PL12-5A|654[0n]BOLD:AAH8697  
 Rogadinae[368]BIOUG55308-E08|Malaise trap PL12-4D|654[0n]BOLD:AAH8697  
 Rogadinae[369]BIOUG54626-A01|Malaise trap PL12-4D|654[0n]BOLD:AAH8697  
 Heterogamus donstonei[370]BIOUG50698-B07|Malaise trap PL12-5A|658[0n]BOLD:AAH8697  
 Heterogamus donstonei[371]BIOUG29392-G08|Malaise trap PL12-9A|576[0n]BOLD:AAH8697  
 Heterogamus donstonei[372]BIOUG30941-F01|Malaise trap PL12-2A|591[0n]BOLD:AAH8697  
 Heterogamus donstonei[373]BIOUG29239-A07|Malaise trap PL12-4A|588[0n]BOLD:AAH8697  
 Heterogamus donstonei[374]BIOUG29390-H04|Malaise trap PL12-9A|589[0n]BOLD:AAH8697  
 Heterogamus donstonei[375]BIOUG29970-B01|Malaise trap PL12-3A|588[0n]BOLD:AAH8697  
 Heterogamus donstonei[376]BIOUG29499-D11|Malaise trap PL12-6A|567[0n]BOLD:AAH8697  
 Heterogamus donstonei[377]BIOUG29958-B04|Malaise trap PL12-3A|576[0n]BOLD:AAH8697  
 Heterogamus donstonei[378]BIOUG28659-B04|Malaise trap PL12-1A|591[0n]BOLD:AAH8697  
 Aleiodes alessandrallae[379]BIOUG52931-E12|Malaise trap PL12-3C|651[0n]BOLD:ACJ2417  
 Aleiodes alessandrallae[380]BIOUG53027-C10|Malaise trap PL12-3C|640[0n]BOLD:ACJ2417  
 Aleiodes alessandrallae[381]BIOUG53172-A01|Malaise trap PL12-3C|647[0n]BOLD:ACJ2417  
 Aleiodes alessandrallae[382]BIOUG53336-B05|Malaise trap PL12-1C|650[0n]BOLD:ACJ2417  
 Aleiodes alessandrallae[383]BIOUG46743-F10|Malaise trap PL12-4B|655[0n]BOLD:ACJ2417  
 Aleiodes alessandrallae[384]BIOUG52065-H07|Malaise trap PL12-8B|650[0n]BOLD:ACJ2417  
 Aleiodes alessandrallae[385]BIOUG29728-B07|Malaise trap PL12-3A|555[2n]BOLD:ACJ2417  
 Aleiodes alessandrallae[386]BIOUG55809-H07|Malaise trap PL12-1D|640[0n]BOLD:ACJ2417  
 Aleiodes alessandrallae[387]BIOUG54606-D03|Malaise trap PL12-3D|644[0n]BOLD:ACJ2417  
 Aleiodes alessandrallae[388]BIOUG53265-D02|Malaise trap PL12-3C|652[0n]BOLD:ACJ2417  
 Aleiodes alessandrallae[389]BIOUG54079-F12|Malaise trap PL12-2C|640[0n]BOLD:ACJ2417  
 Aleiodes alessandrallae[390]BIOUG51574-G03|Malaise trap PL12-3C|647[0n]BOLD:ACJ2417

Aleiodes alessandrallae[388]BIOUG53265-D02|Malaise trap PL12-3C|652[0n]|BOLD:ACJ2417  
Aleiodes alessandrallae[389]BIOUG54079-F12|Malaise trap PL12-2C|640[0n]|BOLD:ACJ2417  
Aleiodes alessandrallae[390]BIOUG51524-G03|Malaise trap PL12-3C|647[0n]|BOLD:ACJ2417  
Aleiodes alessandrallae[391]BIOUG30963-C06|Malaise trap PL12-2A|555[2n]|BOLD:ACJ2417  
Aleiodes alessandrallae[392]BIOUG07616-F05|BSE Malaise Trap|565[0n]|BOLD:ACJ2417  
Aleiodes alessandrallae[393]BIOUG54771-F08|Malaise trap PL12-8C|640[0n]|BOLD:ACJ2417  
Aleiodes alessandrallae[394]BIOUG52292-B11|Malaise trap PL12-3C|653[0n]|BOLD:ACJ2417  
Aleiodes alessandrallae[395]BIOUG55013-F12|Malaise trap PL12-8C|653[0n]|BOLD:ACJ2417  
Aleiodes alessandrallae[396]BIOUG55653-B08|Malaise trap PL12-1D|652[0n]|BOLD:ACJ2417  
Aleiodes alessandrallae[397]BIOUG56134-D04|Malaise trap PL12-6D|654[0n]|BOLD:ACJ2417  
Aleiodes alessandrallae[398]BIOUG55656-C09|Malaise trap PL12-1D|654[0n]|BOLD:ACJ2417  
Aleiodes alessandrallae[399]BIOUG44108-C05|Malaise trap PL12-3B|654[0n]|BOLD:ACJ2417  
Aleiodes alessandrallae[400]BIOUG52308-C03|Malaise trap PL12-3C|653[0n]|BOLD:ACJ2417  
Aleiodes alessandrallae[401]BIOUG44876-F03|Malaise trap PL12-1B|653[0n]|BOLD:ACJ2417  
Aleiodes alessandrallae[402]BIOUG51467-D04|Malaise trap PL12-2B|653[0n]|BOLD:ACJ2417  
Aleiodes alessandrallae[403]BIOUG553030-H03|Malaise trap PL12-3C|655[0n]|BOLD:ACJ2417  
Aleiodes alessandrallae[404]BIOUG52598-G02|Malaise trap PL12-3C|652[0n]|BOLD:ACJ2417  
Aleiodes alessandrallae[405]BIOUG44782-D07|Malaise trap PL12-1B|653[0n]|BOLD:ACJ2417  
Aleiodes alessandrallae[406]BIOUG52070-F05|Malaise trap PL12-8B|651[0n]|BOLD:ACJ2417  
Aleiodes alessandrallae[407]BIOUG53600-B05|Malaise trap PL12-6C|651[0n]|BOLD:ACJ2417  
Aleiodes alessandrallae[408]BIOUG53172-C02|Malaise trap PL12-3C|652[0n]|BOLD:ACJ2417  
Aleiodes alessandrallae[409]BIOUG52564-H11|Malaise trap PL12-3C|655[0n]|BOLD:ACJ2417  
Aleiodes alessandrallae[410]BIOUG52400-G02|Malaise trap PL12-3C|653[0n]|BOLD:ACJ2417  
Aleiodes alessandrallae[411]BIOUG53172-H06|Malaise trap PL12-3C|652[0n]|BOLD:ACJ2417  
Aleiodes alessandrallae[412]BIOUG44782-C11|Malaise trap PL12-1B|654[0n]|BOLD:ACJ2417  
Aleiodes alessandrallae[413]BIOUG52291-C01|Malaise trap PL12-3C|655[0n]|BOLD:ACJ2417  
Aleiodes alessandrallae[414]BIOUG53245-A10|Malaise trap PL12-1C|651[0n]|BOLD:ACJ2417  
Aleiodes alessandrallae[415]BIOUG53143-F11|Malaise trap PL12-9C|651[0n]|BOLD:ACJ2417  
Aleiodes alessandrallae[416]BIOUG51936-C05|Malaise trap PL12-8B|651[0n]|BOLD:ACJ2417  
Aleiodes alessandrallae[417]BIOUG46567-G05|Malaise trap PL12-6B|653[0n]|BOLD:ACJ2417  
Aleiodes alessandrallae[418]BIOUG52291-F04|Malaise trap PL12-3C|652[0n]|BOLD:ACJ2417  
Aleiodes alessandrallae[419]BIOUG44686-F03|Malaise trap PL12-3B|654[0n]|BOLD:ACJ2417  
Aleiodes alessandrallae[420]BIOUG53172-B04|Malaise trap PL12-3C|656[0n]|BOLD:ACJ2417  
Aleiodes alessandrallae[421]BIOUG44838-E03|Malaise trap PL12-1B|653[0n]|BOLD:ACJ2417  
Aleiodes alessandrallae[422]BIOUG556102-A11|Malaise trap PL12-4D|654[0n]|BOLD:ACJ2417  
Aleiodes alessandrallae[423]BIOUG52338-H06|Malaise trap PL12-3C|652[0n]|BOLD:ACJ2417  
Aleiodes alessandrallae[424]BIOUG52437-G05|Malaise trap PL12-3C|653[0n]|BOLD:ACJ2417  
Aleiodes alessandrallae[425]BIOUG52468-B10|Malaise trap PL12-3C|653[0n]|BOLD:ACJ2417  
Aleiodes alessandrallae[426]BIOUG44027-C01|Malaise trap PL12-3B|652[0n]|BOLD:ACJ2417  
Aleiodes alessandrallae[427]BIOUG53029-D11|Malaise trap PL12-3C|651[0n]|BOLD:ACJ2417  
Aleiodes alessandrallae[428]BIOUG44173-C07|Malaise trap PL12-3B|654[0n]|BOLD:ACJ2417  
Aleiodes alessandrallae[429]BIOUG48852-E07|Malaise trap PL12-5A|654[0n]|BOLD:ACJ2417  
Aleiodes alessandrallae[430]BIOUG56122-C02|Malaise trap PL12-6D|654[0n]|BOLD:ACJ2417  
Aleiodes alessandrallae[431]BIOUG52403-A11|Malaise trap PL12-3C|653[0n]|BOLD:ACJ2417  
Aleiodes alessandrallae[432]BIOUG44762-E04|Malaise trap PL12-3B|654[0n]|BOLD:ACJ2417  
Aleiodes alessandrallae[433]BIOUG53172-B01|Malaise trap PL12-3C|652[0n]|BOLD:ACJ2417  
Aleiodes alessandrallae[434]BIOUG54503-A12|Malaise trap PL12-5C|653[0n]|BOLD:ACJ2417  
Aleiodes alessandrallae[435]BIOUG46641-H04|Malaise trap PL12-6B|654[0n]|BOLD:ACJ2417  
Aleiodes alessandrallae[436]BIOUG44775-D05|Malaise trap PL12-3B|654[0n]|BOLD:ACJ2417  
Aleiodes alessandrallae[437]BIOUG51829-H05|Malaise trap PL12-7B|653[0n]|BOLD:ACJ2417  
Aleiodes alessandrallae[438]BIOUG44761-E12|Malaise trap PL12-3B|654[0n]|BOLD:ACJ2417  
Aleiodes alessandrallae[439]BIOUG51525-A11|Malaise trap PL12-3C|652[0n]|BOLD:ACJ2417  
Aleiodes alessandrallae[440]BIOUG52309-D03|Malaise trap PL12-3C|654[0n]|BOLD:ACJ2417  
Aleiodes alessandrallae[441]BIOUG57205-F11|Malaise trap PL12-2D|654[0n]|BOLD:ACJ2417  
Aleiodes alessandrallae[442]BIOUG52931-G02|Malaise trap PL12-3C|651[0n]|BOLD:ACJ2417  
Aleiodes alessandrallae[443]BIOUG52992-D10|Malaise trap PL12-3C|651[0n]|BOLD:ACJ2417  
Aleiodes alessandrallae[444]BIOUG53264-D08|Malaise trap PL12-3C|652[0n]|BOLD:ACJ2417  
Aleiodes alessandrallae[445]BIOUG53600-C01|Malaise trap PL12-6C|654[0n]|BOLD:ACJ2417  
Aleiodes alessandrallae[446]BIOUG53616-E10|Malaise trap PL12-3C|653[0n]|BOLD:ACJ2417  
Aleiodes alessandrallae[447]BIOUG55508-E12|Malaise trap PL12-6D|653[0n]|BOLD:ACJ2417  
Aleiodes alessandrallae[448]BIOUG51829-G07|Malaise trap PL12-7B|652[0n]|BOLD:ACJ2417  
Aleiodes alessandrallae[449]BIOUG54606-C06|Malaise trap PL12-3D|651[0n]|BOLD:ACJ2417  
Aleiodes alessandrallae[450]BIOUG51525-F11|Malaise trap PL12-3C|652[0n]|BOLD:ACJ2417  
Aleiodes alessandrallae[451]BIOUG52292-H08|Malaise trap PL12-3C|653[0n]|BOLD:ACJ2417  
Aleiodes alessandrallae[452]BIOUG53616-H04|Malaise trap PL12-3C|652[0n]|BOLD:ACJ2417  
Aleiodes alessandrallae[453]BIOUG52406-D12|Malaise trap PL12-3C|652[0n]|BOLD:ACJ2417  
Aleiodes alessandrallae[454]BIOUG55809-H08|Malaise trap PL12-1D|672[0n]|BOLD:ACJ2417  
Aleiodes alessandrallae[455]BIOUG09740-D04|BSE Malaise Trap|658[0n]|BOLD:ACJ2417  
Aleiodes alessandrallae[456]BIOUG55653-A12|Malaise trap PL12-1D|663[0n]|BOLD:ACJ2417  
Aleiodes alessandrallae[457]BIOUG51631-H03|Malaise trap PL12-2B|643[0n]|BOLD:ACJ2417  
Aleiodes alessandrallae[458]BIOUG55013-G10|Malaise trap PL12-8C|655[0n]|BOLD:ACJ2417  
Aleiodes alessandrallae[459]BIOUG53265-C11|Malaise trap PL12-3C|641[0n]|BOLD:ACJ2417  
Aleiodes alessandrallae[460]BIOUG51523-H11|Malaise trap PL12-3C|640[0n]|BOLD:ACJ2417  
Aleiodes alessandrallae[461]BIOUG53264-D12|Malaise trap PL12-3C|654[0n]|BOLD:ACJ2417  
Aleiodes alessandrallae[462]BIOUG52602-G04|Malaise trap PL12-3C|655[0n]|BOLD:ACJ2417  
Aleiodes alessandrallae[463]BIOUG52337-C10|Malaise trap PL12-3C|655[0n]|BOLD:ACJ2417  
Aleiodes alessandrallae[464]BIOUG52066-H06|Malaise trap PL12-8B|654[0n]|BOLD:ACJ2417  
Aleiodes alessandrallae[465]BIOUG53435-D12|Malaise trap PL12-1C|652[0n]|BOLD:ACJ2417  
Aleiodes alessandrallae[466]BIOUG52457-C05|Malaise trap PL12-3C|653[0n]|BOLD:ACJ2417  
Aleiodes alessandrallae[467]BIOUG57205-B04|Malaise trap PL12-2D|654[0n]|BOLD:ACJ2417  
Aleiodes alessandrallae[468]BIOUG48852-E06|Malaise trap PL12-5A|652[0n]|BOLD:ACJ2417  
Aleiodes alessandrallae[469]BIOUG53029-C12|Malaise trap PL12-3C|652[0n]|BOLD:ACJ2417  
Aleiodes alessandrallae[470]BIOUG52368-A05|Malaise trap PL12-3C|654[0n]|BOLD:ACJ2417  
Aleiodes alessandrallae[471]BIOUG54960-C01|Malaise trap PL12-3D|657[0n]|BOLD:ACJ2417  
Aleiodes alessandrallae[472]BIOUG53435-A06|Malaise trap PL12-1C|650[0n]|BOLD:ACJ2417  
Aleiodes alessandrallae[473]BIOUG29883-H11|Malaise trap PL12-3A|534[0n]|BOLD:ACJ2417  
Aleiodes alessandrallae[474]BIOUG51524-G10|Malaise trap PL12-3C|640[0n]|BOLD:ACJ2417  
Aleiodes alessandrallae[475]BIOUG52536-H10|Malaise trap PL12-3C|645[0n]|BOLD:ACJ2417  
Aleiodes alessandrallae[476]BIOUG52367-C08|Malaise trap PL12-3C|655[0n]|BOLD:ACJ2417  
Aleiodes alessandrallae[477]BIOUG44872-E06|Malaise trap PL12-1B|654[0n]|BOLD:ACJ2417  
Aleiodes alessandrallae[478]BIOUG53811-A03|Malaise trap PL12-7C|652[0n]|BOLD:ACJ2417  
Aleiodes alessandrallae[479]BIOUG52308-G10|Malaise trap PL12-3C|654[0n]|BOLD:ACJ2417  
Aleiodes alessandrallae[480]BIOUG46562-B09|Malaise trap PL12-6B|654[0n]|BOLD:ACJ2417  
Aleiodes alessandrallae[481]BIOUG54387-C06|Malaise trap PL12-3D|653[0n]|BOLD:ACJ2417  
Aleiodes alessandrallae[482]BIOUG52597-E01|Malaise trap PL12-3C|657[0n]|BOLD:ACJ2417  
Aleiodes alessandrallae[483]BIOUG55084-G02|Malaise trap PL12-1D|658[0n]|BOLD:ACJ2417  
Aleiodes alessandrallae[484]BIOUG29862-A04|Malaise trap PL12-3A|576[0n]|BOLD:ACJ2417  
Aleiodes alessandrallae[485]BIOUG29863-G04|Malaise trap PL12-3A|585[0n]|BOLD:ACJ2417  
Aleiodes alessandrallae[486]BIOUG29836-H03|Malaise trap PL12-3A|588[0n]|BOLD:ACJ2417  
Aleiodes alessandrallae[487]BIOUG29879-F03|Malaise trap PL12-3A|585[0n]|BOLD:ACJ2417

Aleiodes alessandrallae[485]BIOUG29863-G04|Malaise trap PL12-3A|585[0n]|BOLD:ACJ2417  
 Aleiodes alessandrallae[486]BIOUG29836-H03|Malaise trap PL12-3A|588[0n]|BOLD:ACJ2417  
 Aleiodes alessandrallae[487]BIOUG29879-F03|Malaise trap PL12-3A|585[0n]|BOLD:ACJ2417  
 Aleiodes alessandrallae[488]BIOUG18397-D04|BSE Malaise Trap|629[0n]|BOLD:ACJ2417  
 Aleiodes alessandrallae[489]BIOUG53264-H01|Malaise trap PL12-3C|651[0n]|BOLD:ACJ2417  
 Aleiodes alessandrallae[490]BIOUG54582-B01|Malaise trap PL12-3D|652[0n]|BOLD:ACJ2417  
 Aleiodes alessandrallae[491]BIOUG29725-E09|Malaise trap PL12-3A|576[0n]|BOLD:ACJ2417  
 Aleiodes alvarougalei[492]BIOUG44435-B10|Malaise trap PL12-3B|652[0n]|BOLD:ABW3270  
 Aleiodes manuelzumbadoi[493]BIOUG46359-A03|Malaise trap PL12-6B|651[0n]|BOLD:ACL0293  
 Aleiodes manuelzumbadoi[494]BIOUG09827-B10|BSE Malaise Trap|645[0n]|BOLD:ACL0293  
 Aleiodes manuelzumbadoi[495]BIOUG09442-A12|BSE Malaise Trap|658[0n]|BOLD:ACL0293  
 Aleiodes manuelzumbadoi[496]BIOUG52690-E02|Malaise trap PL12-9C|657[0n]|BOLD:ACL0293  
 Aleiodes manuelzumbadoi[497]BIOUG44437-A02|Malaise trap PL12-3B|653[0n]|BOLD:ACL0293  
 Aleiodes manuelzumbadoi[498]BIOUG53624-E09|Malaise trap PL12-9C|651[0n]|BOLD:ACL0293  
 Aleiodes manuelzumbadoi[499]BIOUG44444-G10|Malaise trap PL12-1B|653[0n]|BOLD:ACL0293  
 Aleiodes manuelzumbadoi[500]BIOUG51645-H10|Malaise trap PL12-2B|651[0n]|BOLD:ACL0293  
 Aleiodes manuelzumbadoi[501]BIOUG53160-B10|Malaise trap PL12-9C|653[0n]|BOLD:ACL0293  
 Aleiodes manuelzumbadoi[502]BIOUG46363-H04|Malaise trap PL12-4B|653[0n]|BOLD:ACL0293  
 Aleiodes manuelzumbadoi[503]BIOUG44024-G12|Malaise trap PL12-3B|653[0n]|BOLD:ACL0293  
 Aleiodes manuelzumbadoi[504]BIOUG56070-A05|Malaise trap PL12-9D|653[0n]|BOLD:ACL0293  
 Aleiodes manuelzumbadoi[505]BIOUG52294-C03|Malaise trap PL12-3C|655[0n]|BOLD:ACL0293  
 Aleiodes manuelzumbadoi[506]BIOUG56122-D05|Malaise trap PL12-6D|653[0n]|BOLD:ACL0293  
 Aleiodes manuelzumbadoi[507]BIOUG09739-H01|BSE Malaise Trap|633[0n]|BOLD:ACL0293  
 Aleiodes manuelzumbadoi[508]BIOUG17575-B06|BSE Malaise Trap|603[0n]|BOLD:ACL0293  
 Aleiodes manuelzumbadoi[509]BIOUG17569-D12|BSE Malaise Trap|611[0n]|BOLD:ACL0293  
 Aleiodes manuelzumbadoi[510]BIOUG17575-B03|BSE Malaise Trap|588[0n]|BOLD:ACL0293  
 Aleiodes manuelzumbadoi[511]BIOUG17616-A02|BSE Malaise Trap|585[0n]|BOLD:ACL0293  
 Aleiodes manuelzumbadoi[512]BIOUG28821-H03|Malaise trap PL12-7A|588[0n]|BOLD:ACL0293  
 Aleiodes manuelzumbadoi[513]BIOUG53160-B09|Malaise trap PL12-9C|651[0n]|BOLD:ACL0293  
 Aleiodes manuelzumbadoi[514]BIOUG51841-E11|Malaise trap PL12-7B|652[0n]|BOLD:ACL0293  
 Aleiodes manuelzumbadoi[515]BIOUG46577-A11|Malaise trap PL12-4B|653[0n]|BOLD:ACL0293  
 Aleiodes Malaise8733[516]BIOUG32664-A02|Derrumbe Malaise Trap|510[1n]|BOLD:AAH8733  
 Aleiodes Malaise8733[517]BIOUG31504-G03|Derrumbe Malaise Trap|585[0n]|BOLD:AAH8733  
 Aleiodes alaneaglei[518]BIOUG17566-G02|BSE Malaise Trap|603[0n]|BOLD:AAM5650  
 Aleiodes alisundermieri[519]BIOUG56552-E11|Malaise trap PL12-7D|653[0n]|BOLD:ADB3278  
 Aleiodes alisundermieri[520]BIOUG29288-B08|Malaise trap PL12-3A|594[0n]|BOLD:ADB3278  
 Aleiodes alisundermieri[521]BIOUG51721-C06|Malaise trap PL12-3C|652[0n]|BOLD:ADB3278  
 Aleiodes alisundermieri[522]BIOUG29288-A10|Malaise trap PL12-3A|588[0n]|BOLD:ADB3278  
 Aleiodes alisundermieri[523]BIOUG29481-G05|Malaise trap PL12-3A|588[0n]|BOLD:ADB3278  
 Aleiodes normwoodleyi[524]DHJPAR0030719|Dyschema viuda|613[3n]|BOLD:AAJ4076  
 Aleiodes bobandersoni[525]DHJPAR0051160|Malocampa piratica|657[0n]|BOLD:AAA5372  
 Aleiodes bobandersoni[526]DHJPAR0062156|Malocampa piratica|618[0n]|BOLD:AAA5372  
 Aleiodes bobandersoni[527]DHJPAR0063998|Malocampa matralis|621[0n]|BOLD:AAA5372  
 Aleiodes bobandersoni[528]DHJPAR0062172|Malocampa 08-30689|619[0n]|BOLD:AAA5372  
 Aleiodes bobandersoni[529]DHJPAR0029043|Malocampa matralis|657[0n]|BOLD:AAA5372  
 Aleiodes bobandersoni[530]DHJPAR0052873|Malocampa matralis|658[0n]|BOLD:AAA5372  
 Aleiodes Janzen12[531]DHJPAR0045817|Elymiotis longara|274[0n]  
 Aleiodes stevashei[532]DHJPAR0021180|Lysana Janzen02|660[0n]|BOLD:AAJ4092  
 Aleiodes stevashei[533]DHJPAR0062073|Elymiotis plechelm|658[0n]|BOLD:AAJ4092  
 Aleiodes stevashei[534]DHJPAR0047201|Tachuda discreta|DHJ01|658[0n]|BOLD:AAJ4092  
 Aleiodes stevashei[535]DHJPAR0040461|Tachuda discreta|DHJ01|658[0n]|BOLD:AAJ4092  
 Aleiodes stevashei[536]DHJPAR0062081|Elymiotis plechelm|658[0n]|BOLD:AAJ4092  
 Aleiodes stevashei[537]DHJPAR0062112|Elymiotis plechelm|658[0n]|BOLD:AAJ4092  
 Aleiodes terreerwini[538]DHJPAR0061494|Paectes Poole10|658[0n]|BOLD:ADJ0647  
 Aleiodes Janzen3995[539]DHJPAR0063995|Anomis luridula|612[0n]|BOLD:AEF3944  
 Aleiodes sp. ALW-2011[540]DHJPAR0063970|Anomis luridula|658[0n]|BOLD:AEF3944  
 Aleiodes pauljohnsoni[541]DHJPAR0054923|Erosia veninotata|658[0n]|BOLD:ACM2562  
 Aleiodes pauljohnsoni[542]DHJPAR0054919|Erosia veninotata|658[0n]|BOLD:ACM2562  
 Aleiodes alvaroumanai[543]BIOUG53725-C02|Malaise trap PL12-3D|654[0n]|BOLD:AAM1443  
 Aleiodes alvaroumanai[544]BIOUG52707-C11|Malaise trap PL12-9C|655[0n]|BOLD:AAM1443  
 Aleiodes alvaroumanai[545]DHJPAR0038019|Syngamia florella|658[0n]|BOLD:AAM1443  
 Aleiodes alvaroumanai[546]BIOUG29092-H10|Malaise trap PL12-6A|600[0n]|BOLD:AAM1443  
 Aleiodes alvaroumanai[547]DHJPAR0038017|Syngamia florella|658[0n]|BOLD:AAM1443  
 Aleiodes johnkingsolveri[548]DHJPAR0040450|Chloropteryx BioLep266|658[0n]|BOLD:AAT8850  
 Aleiodes johnehmsaki[549]DHJPAR0045345|Nemoria anae|619[0n]|BOLD:ABX5740  
 Aleiodes adrianforsythi[550]DHJPAR0061499|Eupithecia Janzen774|658[0n]|BOLD:ADJ1086  
 Aleiodes frankhovori[551]DHJPAR0040077|Sabulodes arge|421[0n]  
 Aleiodes Janzen41[552]DHJPAR0040080|Sabulodes arge|421[0n]  
 Aleiodes frankhovorei[553]DHJPAR0040076|Sabulodes arge|616[0n]|BOLD:AAM5640  
 Aleiodes willsflowersi[554]DHJPAR0037966|Antaeotricha Janzen730|658[0n]|BOLD:AAM1704  
 Aleiodes carolinagodayae[555]DHJPAR0023697|Pleuroprucha rudimentaria|640[0n]|BOLD:AAW1567  
 Aleiodes rosewarnerae[556]DHJPAR0023524|Pleuroprucha rudimentaria|657[0n]|BOLD:AAW1573  
 Aleiodes rosewarnerae[557]DHJPAR0023522|Pleuroprucha rudimentaria|660[0n]|BOLD:AAW1573  
 Aleiodes Janzen4526[558]DHJPAR0064526|Semaopis illimitata|658[0n]|BOLD:AEB1336  
 Aleiodes michelldsouzae[559]DHJPAR0042782|Yidalpta auragalis|617[0n]|BOLD:ABA7287  
 Aleiodes Janzen3992[560]DHJPAR0063992|geoJanzen01 19-SRNP-20029|658[0n]|BOLD:AAH8707  
 Aleiodes Janzen3992[561]DHJPAR0064524|geoJanzen01 19-SRNP-20029|658[0n]|BOLD:AAH8707  
 Aleiodes Janzen3992[562]DHJPAR0063994|geoJanzen01 19-SRNP-20029|658[0n]|BOLD:AAH8707  
 Aleiodes Janzen3992[563]DHJPAR0064525|geoJanzen01 19-SRNP-20029|658[0n]|BOLD:AAH8707  
 Aleiodes Janzen3992[564]DHJPAR0064609|geoJanzen01 19-SRNP-20029|658[0n]|BOLD:AAH8707  
 Aleiodes shakirae[565]DHJPAR0063965|Isochromodes carbina|658[0n]|BOLD:AEF4695  
 Aleiodes davefurthi[566]DHJPAR0063445|Eubaphe conformis|658[0n]|BOLD:ACB2701  
 Aleiodes davefurthi[567]DHJPAR0049349|Herbita medona|DHJ02|658[0n]|BOLD:ACB2701  
 Aleiodes davefurthi[568]DHJPAR0064472|Herbita medona|DHJ02|658[0n]|BOLD:ACB2701  
 Aleiodes davefurthi[569]DHJPAR0061881|Simopteryx torquataria|DHJ02|658[0n]|BOLD:ACB2701  
 Aleiodes alejandromasisi[570]BIOUG05466-G08|BSE Malaise Trap|658[0n]|BOLD:ACG6844  
 Aleiodes Janzen4521[571]DHJPAR0064521|geoJanzen01 Janzen7158|658[0n]|BOLD:AAV7490  
 Aleiodes Janzen1913[572]DHJPAR0064517|Herbita medama|658[0n]|BOLD:AEB1913  
 Aleiodes Janzen1913[573]DHJPAR0064001|geoJanzen01 Janzen881|613[0n]|BOLD:AEB1913  
 Aleiodes alexsmithi[574]DHJPAR0062173|Holochroa ochra|658[0n]|BOLD:AAV7512  
 Aleiodes annhowdenae[575]DHJPAR0053665|Eutomepepla artema|655[0n]|BOLD:AAM5664  
 Aleiodes mikeiviei[576]DHJPAR0056334|arcJanzen01 Janzen71434|641[0n]|BOLD:ACS9594  
 Aleiodes agnespeelleae[577]BIOUG29423-E01|Malaise trap PL12-3A|585[0n]|BOLD:AAH8705  
 Aleiodes Janzen2985[578]DHJPAR0065341|Isogona natatrix|647[0n]|BOLD:AEB2985  
 Aleiodes Janzen2985[579]DHJPAR0064529|Isogona Poole07|658[0n]|BOLD:AEB2985  
 Aleiodes angelsolisii[580]DHJPAR0038456|Nicetas Poole11|658[0n]|BOLD:AAM1722  
 Aleiodes Malaise5673[581]BIOUG20202-G10|ESG Malaise Trap|576[0n]|BOLD:AAM5673  
 Aleiodes alanhalevii[582]BIOUG44437-G11|Malaise trap PL12-1B|652[0n]|BOLD:AAM5683  
 Aleiodes alanhalevii[583]BIOUG28817-F08|Malaise trap PL12-7A|564[0n]|BOLD:AAM5683  
 Aleiodes alanhalevii[584]BIOUG29646-B02|Malaise trap PL12-3A|471[1n]|BOLD:AAM5683

Aleiodes alanhalevii[583]BIOUG28817-F08|Malaise trap PL12-7A|564[0n]|BOLD:AAM5683  
 Aleiodes alanhalevii[584]BIOUG29646-B02|Malaise trap PL12-3A|471[1n]|BOLD:AAM5683  
 Aleiodes frostii[585]DHJP0065329|Helia argentipes|637[0n]|BOLD:AED3450  
 Aleiodes[586]BIOUG55307-H10|Malaise trap PL12-4D|653[0n]|BOLD:AAG1413  
 Aleiodes[587]BIOUG55253-G02|Malaise trap PL12-1D|654[0n]|BOLD:AAG1413  
 Aleiodes[588]BIOUG55305-A05|Malaise trap PL12-4D|654[0n]|BOLD:AAG1413  
 Aleiodes[589]BIOUG54676-A07|Malaise trap PL12-3D|653[0n]|BOLD:AAG1413  
 Aleiodes[590]BIOUG55362-H01|Malaise trap PL12-7D|655[0n]|BOLD:AAG1413  
 Aleiodes adrianaraduloviciae[591]BIOUG51276-H03|Malaise trap PL12-7B|654[0n]|BOLD:AAG1413  
 Aleiodes[592]BIOUG55558-D01|Malaise trap PL12-7D|653[0n]|BOLD:AAG1413  
 Aleiodes[593]BIOUG55899-E06|Malaise trap PL12-1D|640[0n]|BOLD:AAG1413  
 Aleiodes adrianaraduloviciae[594]BIOUG28817-F07|Malaise trap PL12-7A|585[5n]|BOLD:AAG1413  
 Aleiodes adrianaraduloviciae[595]BIOUG28804-F01|Malaise trap PL12-6A|337[0n]|BOLD:AAG1413  
 Aleiodes adrianaraduloviciae[596]BIOUG10014-B04|BSE Malaise Trap|619[0n]|BOLD:AAG1413  
 Aleiodes[597]BIOUG55308-F04|Malaise trap PL12-4D|655[0n]|BOLD:AAG1413  
 Aleiodes[598]BIOUG53751-C07|Malaise trap PL12-1D|652[0n]|BOLD:AAG1413  
 Aleiodes[599]BIOUG55306-E06|Malaise trap PL12-4D|654[0n]|BOLD:AAG1413  
 Aleiodes adrianaraduloviciae[600]BIOUG51267-B02|Malaise trap PL12-2B|652[0n]|BOLD:AAG1413  
 Aleiodes[601]BIOUG55320-D04|Malaise trap PL12-6D|653[0n]|BOLD:AAG1413  
 Aleiodes[602]BIOUG55312-D06|Malaise trap PL12-1D|654[0n]|BOLD:AAG1413  
 Aleiodes[603]BIOUG55249-H09|Malaise trap PL12-4D|654[0n]|BOLD:AAG1413  
 Aleiodes[604]BIOUG55237-A12|Malaise trap PL12-3D|653[0n]|BOLD:AAG1413  
 Aleiodes[605]BIOUG55898-C03|Malaise trap PL12-1D|651[0n]|BOLD:AAG1413  
 Aleiodes[606]BIOUG56554-C10|Malaise trap PL12-7D|654[0n]|BOLD:AAG1413  
 Aleiodes adrianaraduloviciae[607]BIOUG48403-B12|Malaise trap PL12-5A|653[0n]|BOLD:AAG1413  
 Aleiodes[608]BIOUG55229-F08|Malaise trap PL12-3D|654[0n]|BOLD:AAG1413  
 Aleiodes[609]BIOUG56436-D11|Malaise trap PL12-6D|652[0n]|BOLD:AAG1413  
 Aleiodes gonodontovor[610]DHJP0021131|Gonodonta fulvangular|655[0n]|BOLD:ACK7827  
 Aleiodes gonodontovor[611]DHJP0064412|Gonodonta incurva|604[0n]|BOLD:ACK7827  
 Aleiodes gonodontovor[612]DHJP0028034|Gonodonta fulvangular|657[0n]|BOLD:ACK7827  
 Aleiodes gonodontovor[613]DHJP0048709|Gonodonta nitidimacula|658[0n]|BOLD:ACK7827  
 Aleiodes gonodontovor[614]DHJP0042799|Gonodonta incurva|658[0n]|BOLD:ACK7827  
 Aleiodes gonodontovor[615]DHJP0029042|Gonodonta uxor|657[0n]|BOLD:ACK7827  
 Aleiodes gonodontovor[616]DHJP0045056|Gonodonta pyrgo|629[0n]|BOLD:ACK7827  
 Aleiodes gonodontovor[617]DHJP0016434|Gonodonta incurva|658[0n]|BOLD:ACK7827  
 Aleiodes gonodontovor[618]DHJP0016919|Gonodonta incurva|657[0n]|BOLD:ACK7827  
 Aleiodes gonodontovor[619]DHJP0016925|Gonodonta incurva|657[0n]|BOLD:ACK7827  
 Aleiodes gonodontovor[620]DHJP0048710|Gonodonta nitidimacula|658[0n]|BOLD:ACK7827  
 Aleiodes gonodontovor[621]DHJP0048708|Gonodonta incurva|658[0n]|BOLD:ACK7827  
 Aleiodes gonodontovor[622]DHJP0028029|Gonodonta fulvangular|657[0n]|BOLD:ACK7827  
 Aleiodes gonodontovor[623]DHJP0048702|Gonodonta nitidimacula|658[0n]|BOLD:ACK7827  
 Aleiodes gonodontovor[624]DHJP0056300|Gonodonta incurva|661[0n]|BOLD:ACK7827  
 Aleiodes gonodontovor[625]DHJP0028025|Gonodonta fulvangular|660[0n]|BOLD:ACK7827  
 Aleiodes gonodontovor[626]DHJP0021155|Gonodonta correcta|657[0n]|BOLD:ACK7827  
 Aleiodes gonodontovor[627]DHJP0021181|Gonodonta immacula|657[0n]|BOLD:ACK7827  
 Aleiodes gonodontovor[628]DHJP0030593|Gonodonta fulvangular|658[0n]|BOLD:ACK7827  
 Aleiodes gonodontovor[629]DHJP0052874|Gonodonta incurva|658[0n]|BOLD:ACK7827  
 Aleiodes gonodontovor[630]DHJP0049948|Gonodonta incurva|658[0n]|BOLD:ACK7827  
 Aleiodes gonodontovor[631]DHJP0029065|Gonodonta fulvangular|657[0n]|BOLD:ACK7827  
 Aleiodes gonodontovor[632]DHJP0021154|Gonodonta fulvangular|657[0n]|BOLD:ACK7827  
 Aleiodes gonodontovor[633]DHJP0021153|Gonodonta incurva|657[0n]|BOLD:ACK7827  
 Aleiodes gonodontovor[634]DHJP0030599|Gonodonta fulvangular|658[0n]|BOLD:ACK7827  
 Aleiodes gonodontovor[635]DHJP0056301|Gonodonta bidens|622[0n]|BOLD:ACK7827  
 Aleiodes gonodontovor[636]DHJP0009352|Gonodonta correcta|657[3n]|BOLD:ACK7827  
 Aleiodes gonodontovor[637]DHJP0049664|Gonodonta incurva|658[0n]|BOLD:ACK7827  
 Aleiodes gonodontovor[638]DHJP0028026|Gonodonta incurva|657[0n]|BOLD:ACK7827  
 Aleiodes gonodontovor[639]DHJP0029068|Gonodonta fulvangular|657[0n]|BOLD:ACK7827  
 Aleiodes gonodontovor[640]DHJP0049663|Gonodonta incurva|658[0n]|BOLD:ACK7827  
 Aleiodes gonodontovor[641]DHJP0028035|Gonodonta fulvangular|657[0n]|BOLD:ACK7827  
 Aleiodes gonodontovor[642]DHJP0029062|Gonodonta bidens|657[0n]|BOLD:ACK7827  
 Aleiodes gonodontovor[643]DHJP0051310|Gonodonta nitidimacula|658[0n]|BOLD:ACK7827  
 Aleiodes gonodontovor[644]DHJP0028027|Gonodonta incurva|657[0n]|BOLD:ACK7827  
 Aleiodes gonodontovor[645]DHJP0040241|Gonodonta bidens|407[0n]|BOLD:ACK7827  
 Aleiodes gonodontovor[646]DHJP0048706|Gonodonta incurva|658[0n]|BOLD:ACK7827  
 Aleiodes gonodontovor[647]DHJP0021156|Gonodonta fulvangular|657[0n]|BOLD:ACK7827  
 Aleiodes gonodontovor[648]DHJP0029041|Gonodonta incurva|657[0n]|BOLD:ACK7827  
 Aleiodes gonodontovor[649]DHJP0029063|Gonodonta bidens|657[0n]|BOLD:ACK7827  
 Aleiodes gonodontovor[650]DHJP0048707|Gonodonta incurva|658[0n]|BOLD:ACK7827  
 Aleiodes gonodontovor[651]DHJP0056302|Gonodonta bidens|661[0n]|BOLD:ACK7827  
 Aleiodes gonodontovor[652]DHJP0045387|Gonodonta incurva|658[1n]|BOLD:ACK7827  
 Aleiodes gonodontovor[653]DHJP0049662|Gonodonta fulvangular|658[1n]|BOLD:ACK7827  
 Aleiodes gonodontovor[654]DHJP0028028|Gonodonta fulvangular|657[0n]|BOLD:ACK7827  
 Aleiodes gonodontovor[655]DHJP0009351|Gonodonta incurva|618[1n]|BOLD:ACK7827  
 Aleiodes gonodontovor[656]DHJP0029049|Gonodonta uxor|657[0n]|BOLD:ACK7827  
 Aleiodes donwhiteheadii[657]DHJP0029061|unknowable|657[0n]|BOLD:AAA5378  
 Aleiodes donwhiteheadii[658]DHJP0042076|Calodesma maculifrons|658[0n]|BOLD:AAA5378  
 Aleiodes henryhowdenii[659]BIOUG30149-A08|Malaise trap PL12-3A|564[0n]|BOLD:ABX5209  
 Aleiodes henryhowdenii[660]DHJP0045467|Anticarsia gemmatalis|658[0n]|BOLD:ABX5209  
 Aleiodes henryhowdenii[661]DHJP0052871|Anticarsia gemmatalis|658[0n]|BOLD:ABX5209  
 Aleiodes henryhowdenii[662]DHJP0065122|Bendisodes aeolia|658[0n]|BOLD:ABX5209  
 Aleiodes henryhowdenii[663]DHJP0063146|Bendisodes Poole02|658[0n]|BOLD:ABX5209  
 Aleiodes henryhowdenii[664]DHJP0063449|Bendisodes Poole02|629[0n]|BOLD:ABX5209  
 Aleiodes inga[665]DHJP0023529|Rosema deolis|633[1n]|BOLD:AAA5377  
 Aleiodes inga[666]DHJP0041207|Letis mycerina|624[0n]|BOLD:AAA5377  
 Aleiodes inga[667]DHJP0029057|Epitaua dilina|657[0n]|BOLD:AAA5377  
 Aleiodes inga[668]DHJP0029050|Helia argentipes|657[0n]|BOLD:AAA5377  
 Aleiodes inga[669]DHJP0029055|Helia argentipes|657[0n]|BOLD:AAA5377  
 Aleiodes charlieobrieni[670]DHJP0051316|Acrotomia mucia|658[0n]|BOLD:ACJ4200  
 Aleiodes charlieobrieni[671]DHJP0063993|Leptostales angulata|595[0n]|BOLD:ACJ4200  
 Aleiodes almosalissae[672]BIOUG31583-C08|Derrumbe Malaise Trap|594[0n]|BOLD:ADF6889  
 Aleiodes alfonsopescadori[673]BIOUG18398-F08|BSE Malaise Trap|632[0n]|BOLD:ACR4858  
 Aleiodes alfonsopescadori[674]BIOUG18499-F03|BSE Malaise Trap|600[4n]|BOLD:ACR4858  
 Aleiodes alfonsopescadori[675]BIOUG44022-F01|Malaise trap PL12-3B|655[0n]|BOLD:ACR4858  
 Aleiodes alfonsopescadori[676]BIOUG46725-E05|Malaise trap PL12-4B|653[0n]|BOLD:ACR4858  
 Aleiodes alfonsopescadori[677]BIOUG17569-F04|BSE Malaise Trap|567[0n]|BOLD:ACR4858  
 Aleiodes alfonsopescadori[678]BIOUG18290-A11|BSE Malaise Trap|594[0n]|BOLD:ACR4858  
 Aleiodes alanflemingi[679]BIOUG27868-C03|ESG Malaise Trap|594[0n]|BOLD:AAM5670  
 Aleiodes[680]DHJP0065344|Letis buteo|626[0n]|BOLD:AED6727
